# Supplementary material for: Transport to the Slaughterhouse Affects the Salmonella Shedding and Modifies the Fecal Microbiota of Finishing Pigs
Source: MDPI journal article supplement (doi:10.3390/ani10040676), 2020-04-13
Supplement: s1 [file s1]

# Color Key and Histogram

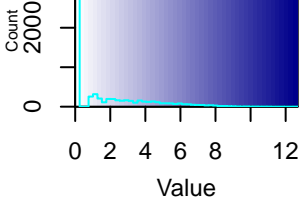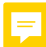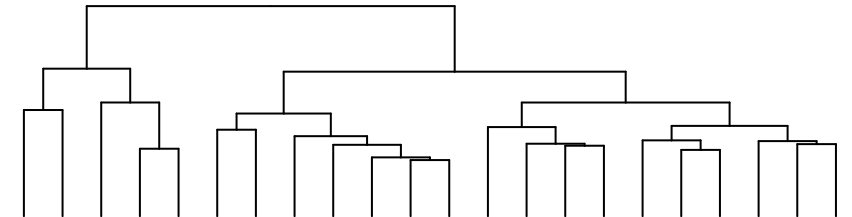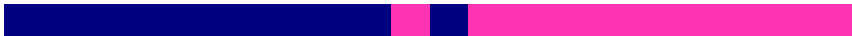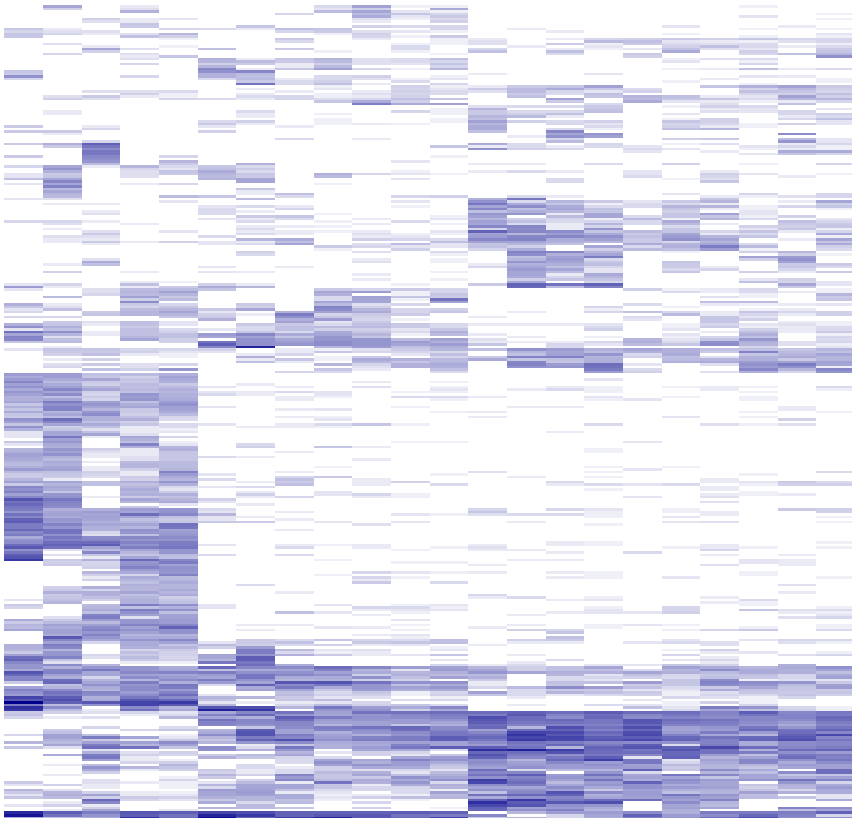

New.Reference.OTU1279  
New.Reference.OTU1788  
New.Reference.OTU831  
New.Reference.OTU1140  
349609  
165623  
301604  
106258  
New.CleanUp.Reference.OTU28413  
52312  
New.Reference.OTU2140  
New.Reference.OTU1490  
New.CleanUp.Reference.OTU55422  
576588  
561003  
344284  
343831  
288106  
802841  
334328  
565327  
New.Reference.OTU2368  
New.Reference.OTU1523  
4116785  
New.Reference.OTU1677  
235109  
New.Reference.OTU85  
152548  
New.Reference.OTU124  
302501  
525988  
571111  
New.Reference.OTU728  
458020  
New.CleanUp.Reference.OTU36456  
25562  
46522  
New.Reference.OTU1717  
New.Reference.OTU2386  
919128  
28056  
22050  
New.CleanUp.Reference.OTU23907  
461467  
New.Reference.OTU2468  
353085  
New.Reference.OTU364  
New.Reference.OTU1987  
New.Reference.OTU2301  
560122  
113248  
220504  
New.Reference.OTU2268  
72454  
522586  
174153  
97263  
24175  
364622  
351417  
541662  
22071  
515445  
554871  
514621  
288719  
36855  
36855  
521200  
353075  
292458  
661758  
4373909  
New.Reference.OTU354  
516576  
544734  
287635  
New.Reference.OTU2243  
4450025  
318828  
New.Reference.OTU2081  
New.Reference.OTU1650  
548071  
11225  
15625  
New.Reference.OTU1136  
721659  
286325  
897681  
351927  
335207  
998205  
641763  
New.Reference.OTU2575  
350071  
580934  
New.Reference.OTU1884  
819191  
584734  
New.Reference.OTU703  
96794  
New.Reference.OTU710  
45921  
644244
