# Supplementary material for: Transport to the Slaughterhouse Affects the Salmonella Shedding and Modifies the Fecal Microbiota of Finishing Pigs
Source: Animals (Basel). 2020 Apr 13;10(4):676. doi: 10.3390/ani10040676 (PMC7222783; doi:10.3390/ani10040676)
Supplement: Supplementary file 1 [file animals-10-00676-s001.zip]

Archive with 8 entries (8 files):
- Figure_S1.pdf
- Figure_S2.pdf
- Table_S1.xlsx
- Table_S2.xlsx
- Table_S3.xlsx
- Table_S4.xlsx
- Table_S5.xlsx
- Table_S6.xlsx
