# Supplementary material for: Transport to the Slaughterhouse Affects the Salmonella Shedding and Modifies the Fecal Microbiota of Finishing Pigs
Source: Animals (Basel). 2020 Apr 13;10(4):676. doi: 10.3390/ani10040676 (PMC7222783; doi:10.3390/ani10040676)
Supplement: Supplementary file 1 [file animals-10-00676-s001.zip › Table_S1.xlsx]

## Sheet: Foglio1
Table S1. The OTU taxonomical assignments and OTU counts in each individual of the whole dataset are showed.
OTU	HERD55	SLAUGHTER16	HERD14	HERD43	SLAUGHTER36	HERD11	HERD12	HERD13	HERD16	HERD15	HERD20	HERD21	HERD28	HERD27	HERD23	HERD24	HERD38	HERD4	HERD49	HERD36	HERD30	HERD53	SLAUGHTER11	HERD57	SLAUGHTER13	SLAUGHTER1	SLAUGHTER14	SLAUGHTER32	SLAUGHTER46	SLAUGHTER55	SLAUGHTER57	SLAUGHTER48	HERD1	HERD19	HERD2	HERD25	HERD40	HERD48	HERD32	HERD46	SLAUGHTER12	HERD6	SLAUGHTER20	SLAUGHTER15	SLAUGHTER18	SLAUGHTER23	SLAUGHTER24	SLAUGHTER25	SLAUGHTER26
New.ReferenceOTU1146	2	4	3	0	4	12	0	7	1	6	0	0	0	1	6	2	5	1	2	0	2	0	11	0	0	9	9	5	2	1	0	11	5	1	1	10	14	6	5	7	6	0	1	8	15	4	0	5	0
New.ReferenceOTU1172	0	14	0	2	7	10	5	0	10	6	0	1	1	0	0	0	10	2	9	1	2	2	12	0	0	3	0	3	0	3	4	8	5	1	0	3	11	7	3	0	14	3	15	8	7	14	7	6	16
581014	8	4	0	2	19	4	0	0	0	0	0	0	0	3	0	2	3	0	0	0	0	0	0	2	0	3	2	11	0	0	4	2	1	0	0	0	2	1	0	1	16	0	1	2	10	0	0	0	0
New.ReferenceOTU1095	0	1	2	0	3	0	3	1	0	1	0	0	0	0	0	2	1	0	0	0	1	1	0	0	0	1	0	0	0	0	1	2	0	0	0	7	0	0	1	1	0	0	2	0	2	3	5	32	4
584765	0	1	0	0	14	8	0	0	3	3	0	0	0	0	6	3	5	0	0	0	4	4	3	0	2	7	1	11	10	1	0	4	1	0	5	5	3	12	2	0	0	0	0	1	10	0	0	5	0
1110135	10	27	6	4	44	46	1	19	2	21	5	0	7	0	8	17	45	4	4	2	12	0	4	0	12	15	12	22	8	12	9	25	14	11	8	33	9	33	9	20	9	0	13	10	20	0	3	14	7
New.ReferenceOTU515	75	0	0	79	1	0	110	0	0	0	248	36	134	36	0	0	0	227	1	80	0	100	0	31	83	0	0	2	40	0	7	0	3	420	0	0	11	0	0	20	0	0	3	0	0	1	0	0	2
347189	4	3	0	5	0	1	4	0	0	0	0	8	0	5	0	0	0	0	4	0	0	0	0	0	3	0	0	0	0	1	0	4	0	0	0	0	1	0	0	0	2	2	0	0	0	0	0	0	0
New.CleanUp.ReferenceOTU254	10	0	0	0	0	0	0	0	0	0	1	2	0	0	0	0	0	2	0	3	0	3	0	0	1	0	0	0	4	0	0	2	0	6	0	0	0	0	0	0	0	0	0	0	0	0	0	1	3
350447	16	5	0	0	2	2	4	3	10	0	0	0	0	2	0	1	1	2	2	0	3	13	10	0	3	0	2	0	2	4	5	3	5	9	6	0	0	7	3	6	30	0	0	10	3	0	0	0	0
106258	0	0	0	0	4	2	0	0	0	0	0	0	0	0	0	0	0	0	0	0	0	4	0	1	0	1	5	0	0	2	5	3	0	0	0	0	0	1	0	0	2	0	0	0	0	0	0	0	0
578649	6	0	0	1	4	0	0	0	2	1	0	0	1	0	0	2	6	2	0	0	0	0	0	5	3	1	0	1	0	0	0	0	21	4	0	1	0	0	0	0	0	2	0	0	5	0	0	1	0
113126	0	0	0	0	0	0	0	0	0	0	0	0	0	0	0	0	0	0	0	0	0	0	0	0	0	0	0	0	0	0	0	0	0	0	0	0	0	0	0	0	0	0	17	0	0	7	2	6	1
New.ReferenceOTU85	8	0	2	1	0	0	1	0	0	0	0	2	6	0	0	0	0	0	0	6	1	0	2	0	0	1	0	0	1	1	2	0	0	3	1	0	0	0	0	0	2	0	0	0	1	0	0	0	0
574038	0	0	1	0	1	3	0	5	0	0	0	0	0	0	0	0	0	0	0	0	0	0	0	0	0	0	0	1	0	0	0	0	0	0	0	3	0	0	0	0	0	0	15	0	0	13	1	3	28
649107	11	3	8	6	4	9	18	2	2	6	1	2	22	3	7	1	1	2	5	26	1	29	2	2	5	3	4	1	3	3	3	4	9	1	3	6	2	9	4	9	1	0	3	3	6	10	23	10	4
New.ReferenceOTU253	16	0	9	4	5	2	5	0	0	3	9	6	24	5	0	3	4	1	3	23	5	24	1	4	9	2	6	0	8	3	5	1	1	10	0	11	3	0	0	9	0	2	10	4	0	0	5	0	14
New.CleanUp.ReferenceOTU5741	0	0	1	1	0	0	2	0	0	0	1	6	7	0	2	0	0	2	0	6	0	11	0	1	0	0	0	0	0	0	1	0	0	0	1	0	0	0	0	0	2	0	0	0	0	0	0	0	0
4483585	12	0	0	6	1	1	3	4	0	1	10	5	11	1	8	1	0	7	7	9	6	6	0	14	2	0	4	0	12	2	2	0	2	6	2	1	3	2	0	3	0	1	152	0	2	116	65	61	132
335267	76	14	68	45	10	60	60	30	8	31	62	63	133	46	20	13	7	31	55	169	53	65	42	90	37	17	27	22	46	18	44	21	41	44	58	45	47	22	19	100	34	30	0	35	16	0	0	0	0
331117	43	3	54	35	6	57	55	28	3	23	50	42	92	30	8	11	7	22	34	117	52	23	31	59	14	10	17	11	47	12	39	24	35	36	19	28	22	5	10	62	20	15	0	13	6	0	0	0	0
354957	107	13	83	75	15	83	89	48	4	46	90	89	185	80	38	28	15	29	80	252	112	72	51	141	47	34	25	45	81	28	108	21	62	70	45	86	84	35	16	100	65	49	0	46	10	0	0	0	0
277265	1	0	5	1	0	3	1	0	0	1	11	3	5	0	1	2	0	2	4	5	0	3	1	8	0	1	0	0	1	2	2	1	0	1	1	0	3	0	0	1	4	4	0	1	0	0	0	0	0
New.ReferenceOTU686	0	7	0	0	0	7	0	0	0	3	0	2	1	0	9	0	1	0	4	0	0	0	4	6	0	2	0	0	2	1	0	3	1	2	0	3	0	0	0	0	0	0	0	0	0	0	0	0	0
1106614	8	16	2	6	3	9	1	2	4	7	4	6	7	10	7	4	0	2	7	15	7	2	15	4	10	3	0	0	11	5	4	0	0	6	1	14	6	0	4	5	1	6	0	0	3	0	0	0	0
532235	0	0	0	0	1	4	3	2	0	3	0	0	0	0	0	2	5	0	2	1	0	0	1	0	1	0	0	2	1	2	0	2	4	4	2	2	0	1	0	0	2	0	0	0	1	0	0	0	0
New.ReferenceOTU703	9	8	5	4	2	10	3	2	0	4	7	8	28	4	5	8	3	11	5	17	4	4	4	9	5	3	6	6	9	0	6	4	1	14	3	7	9	1	4	8	12	6	0	3	3	0	0	0	0
New.CleanUp.ReferenceOTU20710	1	0	0	0	0	2	0	0	0	2	0	0	0	0	0	0	0	1	1	0	1	1	2	0	1	0	1	0	0	0	3	4	0	0	0	2	0	0	0	1	2	0	6	0	0	9	1	14	4
337580	12	14	5	0	8	7	0	1	3	6	3	2	0	0	11	10	5	0	3	1	6	0	7	1	5	3	4	2	0	2	1	15	14	0	7	5	3	5	1	13	26	0	0	4	2	0	1	2	0
297677	0	12	1	3	3	11	0	0	0	8	0	18	0	0	0	11	9	0	2	0	2	0	9	0	0	2	6	0	0	1	1	2	3	0	4	0	6	1	0	11	0	15	0	8	2	0	0	0	0
25842	9	13	1	2	7	3	0	9	3	1	0	6	2	0	5	3	1	0	5	6	2	0	2	14	1	3	3	1	1	2	3	18	9	0	1	6	1	7	13	0	16	6	0	2	8	0	0	0	0
336501	0	5	0	0	2	4	0	1	0	0	0	0	0	0	1	0	2	0	0	0	0	0	0	0	0	0	1	0	0	0	1	0	0	0	0	0	0	0	0	0	0	0	11	0	0	16	2	36	2
845291	3	5	0	4	1	0	8	0	0	0	2	4	1	0	4	0	4	1	2	0	0	0	1	6	2	0	0	0	0	0	0	0	0	2	2	0	7	1	4	5	0	0	9	1	2	30	7	4	4
New.CleanUp.ReferenceOTU16707	0	0	0	0	0	0	0	0	0	0	0	0	0	0	0	0	0	0	0	0	0	0	0	0	0	0	0	0	37	0	0	0	0	0	0	0	0	0	9	14	0	0	13	0	0	0	0	0	0
New.ReferenceOTU1746	0	0	5	3	0	2	0	1	0	1	0	0	0	0	2	0	2	0	1	0	4	0	4	2	0	4	1	0	0	3	0	2	1	0	0	0	0	1	2	3	0	0	5	1	9	0	0	3	2
New.ReferenceOTU1791	2	0	1	0	0	5	4	0	0	0	0	21	2	0	2	0	0	1	0	0	1	0	0	19	0	0	0	0	6	3	3	0	0	2	1	5	0	0	0	2	2	0	3	0	0	0	3	0	0
New.ReferenceOTU2153	0	0	0	0	0	0	0	0	0	0	1	1	1	1	0	0	3	0	0	6	0	0	0	0	0	0	0	0	8	0	0	0	0	3	4	0	2	0	0	8	0	0	4	0	0	1	1	0	0
New.ReferenceOTU146	0	0	0	0	0	5	0	3	0	4	2	0	3	2	10	0	5	0	0	0	0	0	2	0	8	2	6	2	2	4	1	0	0	7	0	1	0	0	0	3	0	8	0	2	1	0	0	5	3
295861	1	8	6	0	7	0	0	1	3	3	2	0	0	0	0	10	1	1	1	2	0	2	2	6	0	0	0	12	0	2	9	9	4	0	2	0	4	5	2	4	34	7	9	0	4	4	1	8	15
358594	0	0	1	0	2	3	2	4	0	0	0	0	0	0	0	0	1	0	2	0	7	0	0	3	0	0	2	2	0	1	0	2	0	0	2	2	3	4	1	1	1	0	4	0	6	0	0	1	0
4404459	5	1	4	5	3	5	0	0	0	1	1	1	0	0	1	3	5	1	0	3	10	2	2	10	2	2	3	5	13	3	3	2	1	5	0	0	0	7	7	3	1	0	5	3	1	2	9	0	2
299376	0	2	2	0	1	1	0	0	2	5	0	0	0	0	0	0	4	0	0	0	0	0	0	2	0	4	2	0	0	0	10	0	1	0	0	2	0	0	0	3	2	0	3	0	1	2	1	0	0
New.ReferenceOTU1509	0	0	0	2	0	0	0	0	0	5	0	0	1	0	0	1	0	0	0	0	0	0	0	2	0	0	2	0	1	0	0	0	0	0	1	10	0	0	0	1	0	0	0	0	2	3	0	5	0
New.ReferenceOTU1956	2	0	0	0	0	0	0	5	2	0	0	2	0	0	0	4	0	0	2	1	4	0	0	11	0	0	2	0	0	2	0	0	4	0	0	6	0	2	0	0	2	0	1	0	1	0	1	1	0
291710	0	4	0	0	4	3	0	6	0	1	0	0	0	0	0	2	0	0	1	0	0	0	1	2	0	0	0	0	0	0	0	3	1	0	3	10	0	0	0	0	3	0	7	1	3	0	0	2	0
289290	3	7	0	0	3	0	0	3	0	0	0	0	0	0	0	0	0	0	0	0	0	0	0	6	0	0	1	0	0	0	0	0	0	0	1	1	0	0	0	0	1	0	0	0	0	2	0	3	0
1146798	4	0	0	0	0	8	0	1	0	1	0	2	0	0	0	0	15	0	0	0	1	0	0	3	0	1	3	1	0	0	1	3	2	0	0	11	0	2	1	0	2	2	0	0	0	0	0	0	0
544734	0	5	5	0	0	0	1	2	3	0	0	0	0	0	2	0	1	0	0	0	1	0	6	3	0	5	5	9	1	3	0	0	0	0	4	1	1	4	3	3	0	0	15	0	1	23	10	24	75
New.ReferenceOTU740	0	36	9	3	0	14	4	9	20	19	1	0	0	4	27	19	6	0	9	2	28	4	51	45	5	43	48	33	4	18	11	6	12	0	27	11	3	4	35	11	0	15	0	13	25	0	0	0	0
333352	0	0	0	0	3	0	0	0	6	0	0	0	0	0	0	3	0	0	1	0	0	0	2	0	0	0	0	0	0	1	0	1	0	0	3	0	2	8	4	0	0	0	0	0	0	0	0	8	4
590209	0	0	2	0	0	0	0	14	3	0	7	0	0	7	0	4	0	0	0	0	21	0	0	0	0	14	1	13	2	7	0	0	0	1	10	7	0	0	6	9	0	1	1	0	13	0	2	0	9
632932	0	0	7	11	0	0	3	0	0	0	7	0	0	13	1	1	0	8	2	0	0	0	1	0	0	0	2	3	5	0	0	0	0	9	13	1	0	0	0	8	0	3	1	0	3	0	3	3	0
New.ReferenceOTU334	0	0	0	0	0	0	0	12	0	0	0	0	0	0	0	0	0	9	0	0	33	0	0	0	0	14	0	0	3	0	0	0	0	0	6	0	0	0	4	8	0	0	0	0	0	0	0	0	0
111202	0	0	0	0	0	0	16	0	13	0	0	0	0	0	0	0	0	0	0	0	0	0	0	0	0	0	0	0	0	0	0	0	0	0	13	0	0	0	0	0	0	0	0	0	0	0	0	0	0
583838	0	13	0	1	3	0	4	3	3	0	1	0	0	0	12	1	1	3	8	1	6	0	2	0	2	4	7	0	0	0	0	4	0	0	13	0	3	7	1	0	0	0	0	0	0	1	2	0	1
344284	0	0	0	0	0	0	19	0	0	0	0	18	0	0	0	0	0	0	0	0	0	0	0	0	0	0	0	0	9	0	0	0	0	1	0	0	0	0	0	20	0	0	0	0	0	0	0	0	0
854151	0	0	0	0	0	0	6	17	0	0	9	34	0	0	11	4	0	3	0	0	0	0	0	0	8	5	7	0	0	1	0	2	2	39	4	4	6	0	4	0	0	0	0	0	1	0	0	0	0
356180	0	2	0	0	0	0	2	7	5	0	6	16	0	0	46	6	0	3	1	0	38	0	0	0	11	13	0	11	0	2	0	0	0	9	0	0	44	0	73	0	0	0	0	0	0	0	2	0	0
New.ReferenceOTU779	0	3	0	1	0	0	1	0	3	0	0	0	0	0	0	0	0	0	0	0	0	0	0	0	0	0	7	0	0	4	0	0	0	0	1	0	1	6	0	1	0	0	2	0	0	0	10	0	0
309873	4	0	15	0	0	0	12	8	2	1	8	5	2	4	18	0	2	7	3	0	12	0	2	0	3	4	12	0	0	0	0	0	8	3	16	4	1	3	2	0	0	4	0	7	0	0	0	0	0
584263	3	5	0	8	15	0	9	0	13	0	1	0	2	16	1	3	0	7	9	0	0	0	0	0	0	6	4	7	2	4	0	3	7	4	4	4	2	10	16	4	0	5	0	0	9	1	1	2	0
249776	1	0	6	3	0	4	2	0	0	7	12	0	1	18	0	0	0	8	9	12	2	0	4	5	0	2	2	0	0	5	2	11	57	20	1	11	1	2	0	3	0	34	1	5	0	0	6	14	0
New.ReferenceOTU435	0	0	0	0	0	0	4	0	0	3	23	3	0	9	8	13	0	9	11	3	4	0	3	0	0	0	7	7	8	9	0	3	0	0	8	0	2	6	3	2	0	0	0	3	0	0	0	0	0
New.ReferenceOTU2334	0	0	0	0	0	0	0	1	0	0	4	0	0	0	2	3	0	0	5	0	0	0	0	2	2	0	0	0	0	1	0	10	0	1	0	4	0	2	0	4	0	0	1	0	3	0	0	4	0
1110312	13	16	5	6	24	1	37	3	18	0	24	20	14	7	24	4	10	11	14	13	13	20	10	7	26	5	15	0	9	8	0	27	5	16	11	12	18	29	5	17	0	14	2	1	41	9	11	20	0
303269	1	6	0	1	3	0	0	0	8	0	8	3	0	2	1	1	7	1	1	8	0	1	0	4	1	0	0	0	0	0	0	11	0	0	1	0	2	5	0	0	0	0	0	0	0	0	0	0	0
362450	7	0	79	45	0	0	85	28	0	11	110	36	9	38	87	86	0	66	0	18	130	205	1	0	93	42	88	0	15	39	0	4	0	96	17	0	54	32	8	29	0	4	27	12	0	0	73	0	18
333387	1	5	5	8	0	0	0	1	1	0	24	0	1	5	4	2	0	18	7	0	16	2	3	0	4	2	13	15	10	1	0	4	10	47	9	0	5	4	10	3	0	0	0	5	0	0	3	0	0
345434	0	0	0	0	1	0	0	1	3	0	2	0	0	0	0	0	0	2	0	0	26	0	0	0	0	0	3	3	3	0	0	0	0	2	0	0	0	0	0	0	0	0	0	0	0	0	0	0	0
348897	0	0	15	0	0	0	67	9	0	58	23	23	0	20	31	41	1	1	3	0	44	0	34	0	24	4	64	13	7	12	0	0	0	26	25	0	16	7	10	6	0	0	0	27	11	0	1	0	1
592649	0	0	1	0	0	0	3	0	0	2	4	3	0	0	7	0	0	2	3	0	1	0	4	0	0	0	3	1	0	0	0	0	0	0	0	0	1	0	0	0	0	0	0	12	0	0	10	3	4
772972	0	0	25	0	6	1	98	7	3	54	90	19	0	22	60	20	0	15	34	0	39	12	4	0	63	11	69	15	61	15	0	3	0	42	28	3	23	12	15	35	0	0	5	124	4	1	5	0	1
231752	0	0	3	0	0	0	3	1	0	0	5	0	0	0	0	0	0	3	2	0	1	0	0	0	0	0	0	4	2	0	0	0	0	3	3	0	0	0	0	1	0	0	2	0	0	0	40	0	4
New.CleanUp.ReferenceOTU21859	0	0	1	0	0	0	2	0	0	0	10	3	0	0	3	3	0	2	3	0	1	0	1	0	0	0	1	0	3	0	0	0	0	3	2	0	2	0	3	3	0	0	0	8	0	0	0	0	0
323818	2	1	0	0	1	0	4	0	1	0	0	1	1	0	0	0	6	1	0	0	7	2	0	0	0	0	0	0	1	1	0	0	0	1	4	0	2	0	2	2	0	2	3	0	2	1	0	3	5
327282	2	6	0	0	0	0	2	4	4	0	2	0	0	0	0	0	0	7	5	0	1	0	0	0	3	0	1	0	3	1	0	5	0	8	0	0	4	8	0	2	0	0	0	0	7	0	0	0	0
461487	18	13	18	7	0	0	8	10	14	0	15	1	0	0	16	5	0	23	10	0	6	1	0	16	16	18	14	2	0	4	0	2	2	32	22	13	134	7	2	17	0	0	0	0	12	0	3	0	0
577512	0	4	0	1	0	0	1	0	9	0	2	1	2	3	2	0	0	4	1	0	1	1	0	0	2	0	2	0	0	1	0	1	1	0	0	0	0	2	3	2	0	0	0	0	3	0	2	5	0
215918	0	0	0	0	4	0	0	1	0	0	3	0	0	11	0	0	1	0	0	0	2	1	3	0	0	8	1	3	0	0	0	0	0	0	1	0	2	0	0	1	0	0	1	0	8	2	0	0	0
290338	0	7	0	0	0	0	15	0	5	0	0	0	0	0	0	0	0	0	12	0	0	0	0	0	0	0	0	0	0	0	0	0	0	0	0	10	1	0	0	0	0	0	0	0	4	0	0	0	0
New.ReferenceOTU1329	0	0	1	5	0	0	0	0	0	0	1	1	1	3	0	1	0	0	0	4	0	0	0	0	14	0	0	0	2	0	0	0	0	7	0	0	1	4	0	2	0	0	0	0	0	0	2	0	0
New.ReferenceOTU1977	0	0	0	4	0	0	2	2	0	0	5	8	2	0	3	0	0	6	0	12	0	1	0	0	8	1	0	2	14	0	0	0	0	13	7	0	11	0	5	9	0	0	23	0	0	2	3	0	0
4451049	87	51	137	1012	13	2	111	57	45	62	945	482	166	519	392	372	23	623	289	523	115	439	19	53	735	92	211	24	1510	78	53	37	59	1293	380	5	991	133	346	464	16	229	1102	48	6	151	139	0	105
New.ReferenceOTU140	0	0	0	0	0	0	0	0	0	0	2	0	0	7	0	1	0	2	6	2	0	6	0	0	6	0	0	0	12	4	0	0	0	3	1	0	7	0	0	0	0	2	7	2	0	1	2	0	0
New.ReferenceOTU1359	5	0	4	2	0	0	1	0	1	1	16	17	7	22	6	10	0	0	5	11	6	1	4	5	29	0	3	0	10	5	0	0	1	9	6	1	9	5	2	7	0	0	3	4	2	0	1	0	0
644244	207	17	129	176	30	47	316	56	31	102	563	861	276	874	946	210	13	65	344	330	229	56	148	234	869	38	153	57	281	80	59	47	168	476	175	51	272	190	78	182	9	75	230	162	22	47	152	72	67
349123	0	0	0	2	0	0	0	2	0	0	4	8	1	3	8	1	0	0	0	0	2	3	0	3	8	0	0	0	0	0	0	0	0	2	2	0	2	1	2	2	0	0	0	2	0	0	2	0	0
578754	1	2	0	0	0	0	0	0	0	0	2	1	3	5	4	0	0	0	4	0	1	2	1	0	2	0	4	0	3	0	0	0	0	5	0	0	3	1	0	0	0	0	0	0	0	0	0	0	0
191738	9	0	1	0	0	0	0	0	0	0	5	4	7	10	0	0	0	0	11	5	0	0	0	1	2	1	1	0	6	0	0	0	0	1	3	0	1	0	0	2	0	0	1	4	0	0	0	2	0
370217	2	0	0	0	1	0	5	2	0	0	16	37	113	107	1	0	0	37	4	1	3	0	0	3	3	0	1	0	0	1	0	0	4	37	4	1	0	0	0	1	0	0	1	2	0	1	0	0	0
335884	0	0	3	6	0	0	14	0	0	0	19	7	0	8	2	0	0	1	0	0	7	0	0	0	11	4	0	0	4	0	0	0	0	22	0	0	47	0	4	0	0	0	0	0	0	0	0	0	0
337057	0	0	1	6	0	0	23	0	0	0	20	0	2	7	4	0	3	25	0	0	10	0	0	5	3	0	0	0	0	0	0	0	5	32	2	0	3	0	1	0	0	0	10	0	0	0	1	0	0
570052	5	3	9	29	2	10	7	6	25	2	23	11	10	6	9	10	1	36	2	30	14	44	2	7	24	0	2	9	17	13	9	2	2	43	0	4	5	2	1	7	0	4	19	2	4	10	11	5	0
856191	0	2	15	9	1	13	10	0	2	2	11	3	0	7	8	0	2	5	0	4	4	6	4	3	1	4	6	3	4	11	13	3	1	2	18	4	1	0	3	4	0	3	2	7	0	2	9	4	2
New.ReferenceOTU2372	13	66	33	115	17	21	87	10	89	53	212	173	63	424	176	47	21	498	58	302	31	191	11	83	152	10	12	1	223	78	44	15	19	583	9	34	52	32	23	64	32	13	6	41	9	0	0	0	0
325254	3	2	6	1	2	1	6	0	10	0	22	17	2	11	14	1	0	34	3	9	5	14	1	0	18	5	2	0	25	18	0	0	3	72	1	3	4	1	6	5	0	6	342	5	0	14	28	0	29
New.ReferenceOTU369	0	0	0	1	0	0	0	0	0	0	8	0	2	7	2	0	0	0	1	0	0	0	0	0	4	0	0	0	9	0	0	0	0	1	3	0	3	0	6	2	0	0	8	0	0	0	0	0	0
New.ReferenceOTU1720	0	0	0	3	0	0	0	0	1	83	3	3	0	1	97	137	1	3	0	3	28	0	3	1	25	0	47	40	757	0	1	2	1	0	1	0	123	0	251	83	0	0	2	151	0	0	10	0	9
138197	0	0	1	1	1	0	10	0	0	0	3	0	5	2	0	3	0	4	0	7	0	0	2	0	2	0	3	1	2	0	3	0	1	11	0	0	6	5	0	0	0	0	1	0	0	0	0	0	0
351823	0	0	6	2	0	0	0	0	0	7	11	15	7	4	2	4	0	10	9	1	0	7	0	0	14	0	4	1	37	0	0	0	0	39	3	0	13	1	8	1	0	0	5	0	0	15	7	0	0
366391	2	0	15	17	3	3	15	0	0	5	43	72	32	33	19	3	0	21	14	5	25	16	8	12	9	0	7	14	16	2	2	3	0	70	4	0	23	0	3	8	3	8	11	2	8	4	8	7	7
224786	0	0	0	0	0	0	0	0	0	0	0	0	0	0	0	0	0	0	0	0	0	0	0	0	0	0	0	0	0	0	0	0	0	0	0	0	0	0	0	0	0	0	19	0	0	18	8	11	2
308912	20	6	15	30	10	6	21	12	6	5	15	9	27	34	5	12	6	70	14	18	11	30	2	14	20	18	9	8	18	10	9	1	20	46	5	7	11	12	2	4	5	5	0	3	19	0	0	1	0
187492	35	0	10	32	0	3	13	0	0	4	39	124	70	12	0	3	16	24	13	13	21	26	10	109	12	1	3	4	29	8	10	1	44	95	11	26	34	3	2	8	15	87	16	1	9	0	5	7	0
792407	1	4	0	0	0	0	5	0	0	0	7	1	0	0	0	0	0	10	0	3	0	0	0	0	0	0	0	0	4	0	0	0	0	7	0	0	10	0	0	3	0	0	4	0	0	1	0	8	0
888914	93	26	69	85	11	8	133	6	21	21	354	288	32	138	103	48	10	302	23	238	75	54	38	37	104	6	44	46	278	88	16	27	13	327	20	29	333	46	58	124	12	36	0	12	22	0	0	0	0
3512153	1	0	0	12	0	2	10	2	1	0	20	12	0	7	1	2	1	19	0	6	5	1	4	6	2	0	2	0	8	9	0	1	1	20	2	0	18	3	5	1	0	1	300	0	0	35	56	14	35
59913	1	0	0	1	0	0	7	0	4	0	8	7	0	3	1	0	0	4	0	7	3	0	0	0	2	1	0	2	9	0	0	0	0	9	1	0	11	0	1	2	0	0	5	1	0	0	0	4	1
410242	21	5	9	4	2	6	18	4	1	3	4	7	0	11	7	8	5	3	8	26	10	2	2	6	8	6	7	1	6	8	3	1	5	3	0	1	5	10	13	12	5	12	21	9	3	13	4	0	11
New.ReferenceOTU1749	1	0	5	3	10	0	14	0	3	0	4	0	1	34	3	21	0	10	17	3	0	0	0	0	5	0	10	6	3	2	3	0	2	1	2	0	2	5	6	8	2	2	0	0	4	1	0	0	0
552988	2	0	1	0	0	0	2	0	0	0	1	2	0	8	2	0	3	2	2	0	0	3	0	0	9	0	0	2	1	0	1	0	0	6	0	0	2	0	7	0	0	0	0	2	2	0	0	0	0
345834	3	0	4	3	1	7	18	5	9	6	28	20	26	25	2	4	7	22	2	5	9	4	7	8	5	2	5	2	32	5	10	0	8	7	1	3	4	1	21	17	10	4	0	10	0	1	0	0	0
295427	0	0	0	4	0	0	2	0	0	0	2	1	1	0	4	1	2	4	0	3	0	3	1	2	5	0	0	0	2	2	0	0	0	0	6	0	0	0	1	1	0	0	0	2	0	0	0	0	0
301464	0	2	5	0	0	0	0	0	2	1	2	3	0	0	3	26	0	0	0	0	8	0	0	0	4	0	8	4	18	1	0	0	0	0	3	0	76	0	22	3	0	0	14	10	0	0	5	0	1
305261	9	1	2	4	0	4	13	1	2	0	14	8	16	14	0	6	2	27	9	4	5	5	8	2	0	4	2	0	9	7	4	0	0	6	0	0	2	0	7	5	0	6	3	3	0	5	1	1	1
577562	0	0	1	4	0	1	14	0	0	3	1	9	3	4	13	6	3	9	1	1	0	0	4	1	5	0	4	0	0	0	0	1	0	4	0	0	8	1	2	5	0	7	4	3	0	4	5	0	0
621649	8	7	4	7	1	11	8	0	12	9	11	4	37	27	3	13	10	22	17	9	23	12	12	2	15	4	6	2	48	1	29	4	10	2	1	3	25	2	8	22	8	17	17	9	4	41	6	4	4
348839	2	3	0	7	2	10	4	0	2	0	5	3	4	10	4	1	7	10	3	0	0	6	0	5	2	2	0	0	7	1	10	0	0	1	0	0	4	2	5	4	7	2	0	0	2	2	0	0	0
New.ReferenceOTU2599	1	0	0	4	0	3	6	0	1	1	9	0	15	7	6	1	1	5	3	3	1	4	0	14	4	0	0	0	1	3	0	3	1	1	0	0	0	0	0	2	0	2	1	0	0	0	0	0	1
305187	22	3	14	56	0	2	75	1	1	8	232	22	259	217	75	44	15	60	258	36	9	74	9	153	35	8	14	7	47	6	15	2	11	61	2	7	36	4	5	12	1	20	5	12	1	1	38	1	1
New.ReferenceOTU1074	0	1	4	0	2	0	0	0	0	2	0	0	1	0	3	4	0	0	0	2	3	0	4	0	4	3	1	4	0	3	1	0	2	0	5	0	7	0	2	0	0	0	0	6	3	0	0	0	0
325213	3	0	0	0	0	0	0	0	0	0	1	0	0	0	0	0	0	0	0	0	0	0	0	0	0	0	0	0	0	0	0	0	2	0	0	0	1	0	0	0	1	2	13	0	0	1	10	14	4
572130	23	7	10	3	0	3	19	2	5	11	58	7	28	22	0	4	10	19	15	3	26	0	0	38	3	12	6	8	13	3	9	4	16	36	0	8	30	2	3	4	0	54	0	13	2	0	0	0	0
301715	3	0	0	3	0	0	1	0	0	0	1	8	0	0	2	2	0	0	1	0	0	0	0	1	0	0	0	0	0	0	0	0	0	16	0	2	9	0	5	0	0	4	0	0	0	0	0	0	0
New.ReferenceOTU274	0	0	5	10	0	0	4	6	3	5	16	10	0	6	8	3	0	7	14	15	7	13	6	4	10	5	18	12	0	10	3	3	4	8	3	1	14	2	1	1	0	20	1	11	0	2	9	0	2
360890	0	0	0	3	0	0	0	0	0	0	6	0	5	12	2	0	0	18	0	0	0	0	0	0	1	0	2	0	3	0	0	0	0	3	0	0	3	0	0	4	0	0	0	0	0	0	0	0	0
562900	0	0	5	1	0	0	0	0	0	0	0	0	1	0	2	0	0	0	0	0	2	0	0	0	0	0	0	0	0	0	0	0	0	0	0	0	2	0	1	0	0	0	0	0	0	0	0	0	0
700540	0	0	0	0	0	0	0	0	0	0	0	0	0	0	1	0	0	0	1	0	0	0	0	0	0	0	0	0	0	0	0	0	0	0	0	0	0	0	0	0	0	0	9	1	0	7	0	0	20
827702	5	3	8	13	0	1	7	3	4	10	10	21	16	42	21	2	0	22	10	8	4	27	2	2	11	9	18	4	20	5	16	3	12	18	7	0	9	3	21	17	0	3	0	32	7	0	0	0	0
349752	6	32	71	23	1	6	5	30	14	11	9	4	9	35	8	42	1	14	9	16	20	14	8	10	8	50	117	34	21	19	24	1	5	1	10	4	27	0	24	15	1	0	15	45	27	7	1	0	10
4466705	0	0	0	0	0	0	0	0	0	0	0	0	0	0	0	0	0	0	0	0	0	0	0	0	0	0	0	0	0	0	0	0	0	0	0	0	0	0	0	0	0	0	12	0	0	35	6	8	21
New.ReferenceOTU2468	0	5	0	57	7	0	74	0	5	7	15	0	0	45	8	9	0	0	15	4	8	8	5	0	22	1	7	4	8	3	0	1	0	0	48	0	14	0	21	2	0	2	10	74	6	24	8	0	3
607825	2	1	29	20	4	0	21	37	2	5	5	0	0	24	4	27	0	0	11	2	12	2	6	0	3	61	15	6	11	0	1	0	1	0	9	1	5	0	21	2	0	1	0	48	43	0	0	0	0
512398	6	2	8	15	16	16	5	2	25	5	1	1	3	14	2	8	28	19	15	6	12	10	36	12	6	2	12	18	45	1	57	9	29	12	6	3	4	15	37	59	0	21	35	29	14	18	5	13	10
353214	0	3	0	2	0	2	6	0	0	2	0	16	35	1	0	1	0	6	0	0	2	4	4	6	0	0	0	1	0	0	0	0	2	8	1	4	4	0	1	2	3	1	0	0	0	0	0	0	0
168625	0	0	0	3	0	1	7	0	1	0	0	0	0	0	0	0	0	2	2	3	2	0	0	10	3	0	0	0	0	0	4	0	0	1	0	0	3	0	0	0	0	6	2	2	2	2	0	2	2
619919	35	26	14	52	6	7	32	10	13	12	36	38	64	78	39	18	4	35	54	23	25	6	12	20	29	9	14	5	27	10	67	9	12	21	0	6	29	10	26	32	2	31	35	24	10	76	7	13	19
295935	1	0	0	0	0	0	1	0	0	0	0	0	0	0	4	1	0	0	6	0	1	0	0	4	1	1	1	0	0	0	2	1	2	0	0	0	0	1	3	2	0	0	1	0	0	0	0	1	0
317515	8	5	6	7	2	16	7	6	10	8	3	1	9	6	5	15	0	7	14	19	1	4	9	7	8	5	8	2	18	13	21	5	4	0	3	6	8	2	4	13	3	7	7	2	5	8	10	6	1
295100	0	0	0	2	0	0	2	0	0	0	8	8	9	0	0	0	0	0	0	0	6	0	0	5	0	0	1	2	0	0	0	0	0	6	3	0	0	0	2	0	2	2	0	0	0	0	0	0	0
353336	3	0	0	1	0	0	10	0	3	0	0	8	7	0	2	0	3	1	4	0	0	0	3	7	6	0	0	0	0	2	7	0	0	0	1	2	0	0	0	0	0	11	0	0	0	0	0	0	0
New.ReferenceOTU1092	0	0	2	3	0	3	0	0	1	0	1	1	3	5	1	1	2	1	3	0	0	1	1	2	2	0	0	0	0	0	5	1	0	0	0	2	0	2	0	0	0	0	0	5	3	0	0	0	0
799443	5	10	8	13	10	10	31	3	12	22	18	10	13	21	17	4	13	7	28	8	3	8	13	17	7	2	8	7	6	11	63	5	14	10	26	0	17	9	6	3	10	12	0	23	3	0	0	0	0
373928	0	1	3	6	0	0	2	1	0	0	0	3	2	19	8	8	0	7	1	0	1	1	0	0	2	1	8	10	3	0	0	0	0	0	0	0	1	0	7	1	3	0	14	4	2	33	8	5	27
529258	21	58	15	36	16	58	33	17	11	51	43	38	112	87	51	52	35	59	34	19	64	47	83	38	33	16	57	47	25	31	155	25	36	14	15	56	25	18	23	23	28	59	48	67	41	78	39	42	29
513706	3	0	0	0	0	0	0	0	0	5	0	2	4	3	1	1	1	4	2	0	3	0	6	1	1	0	2	0	0	1	1	3	1	0	0	1	0	3	0	0	0	0	0	0	2	3	0	0	0
New.CleanUp.ReferenceOTU24182	3	2	2	1	1	1	2	0	0	0	0	0	3	5	0	3	0	11	5	0	2	1	0	0	4	0	3	2	0	1	9	5	1	1	1	4	1	0	1	0	2	8	0	4	3	0	0	0	0
798164	8	20	23	41	31	33	54	32	6	18	89	31	29	87	23	30	8	64	41	25	38	65	18	26	33	27	42	47	38	20	100	7	58	18	14	17	46	20	32	16	23	24	31	41	45	32	11	16	26
343353	0	0	0	0	0	0	0	0	0	0	0	0	0	0	0	0	0	0	0	0	0	0	0	0	0	0	0	0	0	0	0	0	0	0	0	0	0	0	0	0	0	0	18	0	0	31	21	27	15
New.ReferenceOTU697	4	1	13	1	2	8	7	5	0	4	10	13	8	4	6	11	2	9	8	2	9	8	15	17	1	2	13	7	25	4	21	6	3	5	2	6	9	0	4	6	5	9	3	5	7	1	0	0	0
313089	4	0	3	0	0	0	0	0	0	0	7	0	1	7	0	3	1	7	3	0	3	0	0	4	0	0	7	2	6	1	0	0	1	5	8	1	5	0	0	0	1	7	1	0	0	3	0	2	1
New.ReferenceOTU1873	2	1	0	0	0	1	7	0	0	0	3	0	1	3	1	13	4	0	8	6	3	1	0	2	5	0	4	0	2	0	1	0	0	0	1	0	2	0	2	0	0	0	0	0	2	0	0	0	0
796871	3	0	1	2	0	0	8	1	0	0	1	4	13	26	1	9	0	9	0	0	1	1	0	6	1	2	2	3	8	3	1	0	0	0	0	0	0	0	3	0	0	0	0	1	1	4	0	0	0
New.ReferenceOTU2228	0	2	0	0	0	0	0	0	1	0	1	0	0	3	0	3	0	3	4	0	2	0	2	0	0	0	0	0	2	1	1	0	0	2	0	0	0	0	0	0	0	0	0	3	0	0	0	0	5
New.ReferenceOTU2359	0	5	0	0	10	0	0	0	1	0	8	0	4	0	1	14	10	4	3	0	0	4	0	4	2	0	1	9	1	0	2	2	2	0	0	0	2	0	1	0	2	3	3	0	4	0	5	1	4
New.ReferenceOTU2256	0	1	0	0	0	3	0	0	0	1	0	0	1	6	0	0	5	1	0	2	6	3	3	7	5	8	3	0	2	0	6	6	4	4	0	2	1	3	3	4	0	1	3	7	5	6	0	7	2
4296764	5	2	0	3	3	8	9	10	5	3	3	3	5	10	1	2	8	7	1	0	14	12	8	12	6	2	3	9	4	0	12	6	9	17	6	11	1	1	5	6	4	6	0	15	9	0	0	0	0
New.ReferenceOTU1085	0	0	0	0	0	0	0	0	0	0	3	0	0	8	14	3	0	0	2	0	0	0	0	0	7	0	0	1	0	3	0	0	0	1	2	0	7	0	3	0	0	1	0	3	0	0	5	0	0
New.ReferenceOTU797	0	1	0	2	0	2	3	0	4	0	1	0	0	1	0	0	0	4	1	0	1	0	5	1	0	0	0	0	0	3	4	0	1	1	0	1	0	0	0	0	0	0	0	0	3	0	0	2	0
New.ReferenceOTU1087	0	0	1	0	0	0	0	0	0	0	0	0	1	1	1	0	0	0	2	0	0	0	0	2	0	0	1	0	4	0	0	0	0	3	1	0	0	7	1	4	0	0	1	0	0	2	0	0	6
34789	0	0	1	1	0	0	0	0	0	4	0	0	2	2	2	6	0	0	0	0	0	0	1	0	0	4	2	3	1	0	0	0	0	2	2	0	1	0	4	1	2	0	0	0	2	2	0	0	2
2256425	1	0	0	0	0	6	3	0	0	0	1	3	0	1	0	0	0	6	2	0	0	0	2	0	0	0	0	4	0	2	0	0	0	0	5	2	1	0	0	3	4	0	0	0	0	0	0	0	0
New.ReferenceOTU1642	0	0	0	2	1	0	0	0	0	1	0	3	0	11	4	2	0	0	1	1	0	0	0	5	0	0	0	0	3	4	0	2	0	0	0	0	1	0	6	1	0	0	1	1	0	2	2	6	1
552235	3	0	0	0	0	0	0	0	0	0	0	1	0	38	1	0	0	6	0	0	0	3	0	1	0	0	0	0	0	0	0	0	0	0	0	0	0	0	0	0	2	0	0	0	0	2	2	0	0
New.ReferenceOTU117	1	2	0	0	0	3	0	0	1	1	4	4	0	0	0	0	0	2	7	0	0	4	0	1	1	1	0	2	0	3	0	0	0	0	0	0	4	0	2	4	0	1	1	0	0	1	0	0	0
New.ReferenceOTU728	0	0	2	3	0	0	5	0	0	2	1	3	0	2	5	3	2	5	5	0	2	0	1	6	0	4	1	0	20	0	0	0	0	7	0	2	3	0	3	4	0	0	3	0	0	0	0	0	0
New.ReferenceOTU1510	4	0	0	0	0	0	1	0	0	2	4	3	0	8	0	0	0	1	1	0	0	0	5	0	0	2	4	0	0	2	0	0	0	3	0	0	0	0	1	4	0	0	2	0	1	0	0	0	0
New.ReferenceOTU81	0	0	0	0	0	0	0	0	1	1	1	0	0	0	10	15	0	0	3	0	0	0	0	0	4	0	2	0	0	6	0	0	0	0	0	0	1	6	0	0	0	0	0	0	0	0	0	0	0
New.ReferenceOTU1916	0	0	0	0	0	3	0	0	1	0	0	0	0	0	1	5	0	0	3	0	0	0	0	2	0	0	5	0	7	3	0	0	0	0	0	1	0	0	0	10	0	0	0	0	0	1	0	3	1
New.ReferenceOTU2332	0	0	0	0	0	0	0	0	0	0	6	0	0	0	1	15	0	0	1	0	0	0	0	0	4	0	0	0	4	0	0	0	0	0	2	0	0	0	0	4	0	0	14	0	0	0	0	0	0
New.ReferenceOTU1455	0	0	0	0	0	2	0	0	0	0	3	0	0	0	6	6	1	1	1	0	0	0	3	0	0	0	0	0	1	0	0	0	1	0	0	1	0	0	0	0	0	0	0	0	0	0	0	4	0
New.ReferenceOTU91	0	0	1	0	0	0	8	2	1	0	0	2	13	2	0	6	6	11	1	0	4	0	2	17	0	10	9	0	6	4	3	0	1	0	0	4	0	0	0	2	0	2	2	0	5	2	0	0	0
New.ReferenceOTU273	0	0	0	0	0	10	4	0	0	0	10	0	0	5	0	4	0	5	0	0	0	1	0	3	2	4	2	0	0	0	0	0	0	0	0	0	0	0	2	2	0	0	0	0	1	0	4	0	0
New.ReferenceOTU1301	3	0	3	0	0	3	1	1	0	2	3	1	4	0	2	4	13	1	2	0	4	6	1	8	0	0	1	1	6	2	0	0	0	0	2	0	0	1	0	3	0	4	0	0	0	0	0	0	0
New.ReferenceOTU1621	1	0	1	0	0	0	7	0	5	0	39	11	8	5	7	9	10	7	4	1	5	0	0	22	1	2	18	0	0	4	4	0	0	4	1	0	3	0	2	21	0	0	0	0	4	0	6	0	0
New.ReferenceOTU2135	5	0	0	2	2	0	0	0	7	0	0	0	0	0	2	3	13	0	1	0	0	0	4	2	1	1	12	0	2	0	2	0	0	0	1	0	2	0	0	0	0	0	0	0	8	0	2	0	0
New.ReferenceOTU866	1	0	0	0	0	0	0	0	0	0	0	0	0	1	0	1	7	0	0	0	0	0	2	0	0	8	0	0	0	1	0	0	0	0	0	0	0	0	0	0	0	0	2	0	2	0	0	0	0
New.ReferenceOTU2205	14	0	4	0	0	0	0	0	0	0	0	0	0	0	12	7	4	0	2	0	0	0	0	0	5	2	18	4	6	0	0	0	0	0	0	0	0	8	1	7	0	0	7	0	2	0	0	0	0
New.ReferenceOTU2596	0	0	0	0	0	0	0	0	0	0	8	0	0	0	0	64	0	0	0	0	20	0	0	0	2	0	0	2	9	0	0	0	0	0	0	0	10	0	2	17	0	0	4	0	0	0	1	0	2
New.ReferenceOTU1742	0	1	0	0	0	0	0	0	0	0	0	2	0	0	1	0	9	0	0	0	0	0	5	7	0	3	0	0	2	2	0	0	0	4	2	0	0	0	3	3	0	3	0	0	0	0	0	0	0
343740	0	0	0	0	0	0	0	0	0	0	0	0	0	6	10	6	0	2	0	0	1	0	4	0	4	1	0	0	0	0	0	2	0	0	0	0	0	0	0	0	0	0	5	4	0	0	0	0	0
New.ReferenceOTU2091	5	5	0	1	0	3	0	0	0	0	3	2	0	0	5	7	2	0	0	0	0	0	0	6	4	1	0	0	1	0	2	1	0	0	0	0	0	0	0	2	0	0	1	0	0	0	1	1	0
593156	0	0	2	0	0	9	5	0	1	1	2	1	6	0	9	5	3	1	0	2	1	0	3	11	2	0	1	0	4	0	1	0	1	3	0	0	0	0	0	1	0	2	6	1	2	0	5	0	5
New.ReferenceOTU2732	6	4	0	0	0	0	4	0	0	4	14	0	144	17	12	4	0	0	3	0	1	0	5	16	1	0	6	2	6	8	3	8	3	7	2	1	9	0	0	3	0	4	13	0	1	0	0	0	4
110842	23	0	0	5	0	18	3	0	0	3	37	15	135	78	52	27	5	27	29	0	4	6	0	20	10	2	7	1	58	0	3	4	1	15	0	0	19	0	8	34	8	0	0	0	0	0	0	0	0
343831	0	0	0	0	0	1	1	0	0	0	1	0	9	0	1	0	2	1	2	0	0	0	0	1	0	0	0	0	2	0	0	0	0	2	0	0	4	0	0	0	0	0	38	0	0	0	3	2	0
New.ReferenceOTU690	0	0	2	0	1	2	0	0	1	0	3	1	0	0	13	2	2	0	0	0	2	0	2	5	4	1	6	0	21	0	0	0	0	3	2	0	6	0	0	14	4	0	6	0	0	0	0	0	0
292621	0	0	3	0	0	0	5	0	0	0	1	0	0	1	4	0	0	7	13	0	2	0	0	0	1	0	1	0	13	1	0	0	0	0	0	0	0	0	9	1	0	0	1	6	0	1	0	0	0
172163	8	2	0	0	1	8	3	0	4	0	10	2	24	4	3	0	6	1	2	2	2	0	0	32	0	0	0	0	8	3	8	1	1	2	0	5	0	0	2	3	3	2	8	0	0	1	2	0	0
4402042	1	0	0	0	0	0	0	1	0	0	4	1	0	2	0	1	0	0	0	0	0	0	4	5	0	3	1	0	0	1	0	0	0	2	0	0	0	0	2	9	0	0	0	0	1	0	0	0	0
New.ReferenceOTU124	0	1	1	2	0	2	19	3	0	0	12	26	18	4	0	7	0	8	7	2	5	2	6	22	1	0	13	0	34	0	1	2	2	9	3	4	0	1	0	27	0	4	2	0	0	0	0	0	0
187767	13	5	8	25	0	6	39	0	5	2	40	99	65	54	10	99	8	43	55	23	29	9	9	69	2	1	48	0	106	7	5	0	7	37	12	2	1	9	0	101	0	7	29	1	8	0	9	0	0
New.ReferenceOTU1240	0	0	1	1	0	1	13	0	0	0	12	11	14	22	0	15	0	3	8	6	4	0	3	12	0	0	13	0	25	1	1	0	2	5	1	1	0	0	0	24	0	4	22	0	0	0	22	2	1
591464	0	0	0	0	0	0	0	3	4	0	1	0	0	0	6	0	0	4	2	0	2	0	0	0	4	2	3	3	6	0	0	1	0	0	1	0	0	5	3	0	0	0	0	3	0	0	2	0	0
197539	0	1	0	1	4	0	1	0	13	4	0	4	9	16	3	15	3	2	3	0	5	2	3	13	8	0	5	0	4	0	0	2	3	0	4	1	5	1	0	6	0	4	1	1	0	0	8	0	0
4334844	1	0	0	2	0	4	3	0	2	0	0	0	1	1	0	5	3	0	6	0	4	0	7	0	5	2	0	0	3	3	2	2	4	0	0	0	3	0	0	3	1	2	0	0	1	0	1	0	0
New.ReferenceOTU2143	0	2	2	0	0	12	0	5	0	1	0	2	11	0	0	3	5	0	1	0	0	2	5	22	0	1	0	2	0	0	0	1	2	0	0	0	0	4	0	2	0	2	0	0	0	1	2	0	0
3060611	1	0	2	0	1	6	4	0	0	0	0	0	3	1	2	13	6	3	3	0	3	0	3	4	3	2	0	1	0	5	2	3	7	0	1	1	5	0	0	9	1	4	0	0	2	1	5	0	0
288683	6	16	6	3	8	15	14	16	8	36	22	24	1	20	6	16	12	13	27	5	5	18	14	4	19	19	18	35	11	26	74	20	34	3	21	7	10	20	6	15	0	17	7	35	64	71	43	69	48
290804	3	0	0	4	0	1	2	2	0	0	0	0	2	3	0	0	2	6	0	0	4	4	0	0	0	4	6	3	2	1	9	0	0	2	0	1	2	1	0	2	0	3	5	3	3	27	5	2	6
New.ReferenceOTU1940	0	2	3	5	0	1	0	6	0	0	3	1	8	20	0	1	0	8	2	0	0	0	0	4	3	1	1	1	7	0	0	2	0	2	1	0	2	0	0	0	0	0	1	2	0	7	1	0	1
301137	2	1	0	4	0	0	11	1	4	3	11	2	3	7	4	4	0	5	8	5	1	5	0	2	5	2	3	3	10	4	0	2	4	3	2	4	6	1	1	11	1	8	0	10	0	3	4	0	4
368175	3	0	0	0	0	0	6	0	0	3	2	3	1	0	0	0	0	8	0	0	0	0	5	0	0	0	0	0	0	0	2	3	0	0	0	0	0	0	0	0	7	0	0	0	0	4	0	0	0
New.ReferenceOTU1648	2	0	0	0	0	4	0	0	0	3	4	2	5	1	0	3	0	6	1	0	0	4	1	6	0	0	0	0	0	0	17	0	0	4	0	0	0	3	0	0	0	3	0	0	1	1	5	0	0
241290	0	12	0	0	0	0	4	3	3	4	2	0	0	5	1	3	2	0	2	0	5	2	2	0	2	0	1	0	2	2	2	0	0	0	3	2	0	0	1	2	0	0	0	2	1	17	4	0	3
1060029	0	1	0	0	0	7	3	1	0	0	9	1	0	0	3	3	0	0	0	0	1	0	6	3	0	0	2	3	0	2	7	1	4	0	0	0	0	0	5	0	0	0	2	4	0	7	0	0	5
106764	16	0	0	1	2	0	8	2	0	1	0	0	1	0	0	5	0	0	2	0	0	0	5	3	0	0	0	0	0	8	0	0	12	0	1	0	1	0	0	1	0	0	0	1	0	0	10	0	0
New.ReferenceOTU1934	5	2	0	1	0	0	0	0	8	0	0	0	6	0	0	3	2	0	1	2	0	0	4	0	0	6	0	0	0	1	0	0	1	0	0	0	0	3	1	0	0	3	0	0	0	0	16	13	0
23625	226	82	12	5	12	15	4	3	28	6	5	3	3	0	86	33	21	0	51	0	108	8	12	122	80	33	41	0	30	45	4	1	26	9	4	18	40	3	50	32	12	69	31	79	11	21	25	6	20
New.ReferenceOTU717	16	6	0	2	0	6	0	0	16	0	0	0	1	0	0	0	3	0	0	2	0	0	0	1	2	4	4	0	0	9	0	0	22	0	0	0	0	0	5	0	0	0	0	5	2	0	5	15	1
25453	0	3	5	0	2	0	4	0	0	0	0	0	0	0	0	4	0	0	0	0	0	6	0	1	0	3	19	0	1	0	3	3	0	0	0	2	0	2	0	10	0	0	0	0	0	0	0	1	0
New.ReferenceOTU2211	3	5	6	6	2	9	7	0	4	15	1	2	0	1	0	0	0	0	5	7	0	3	19	15	0	4	12	0	8	4	6	8	13	0	0	9	5	2	9	7	0	22	1	0	10	2	9	7	13
4453773	127	61	81	79	33	61	42	31	78	61	106	74	94	104	73	43	43	77	73	53	69	89	58	74	80	32	64	37	125	66	132	92	54	130	40	38	62	89	60	113	123	36	104	38	138	67	34	41	41
New.ReferenceOTU1585	1	4	6	0	1	2	0	6	1	1	2	0	3	3	1	0	0	0	0	0	0	0	0	0	4	5	4	0	3	1	0	1	2	0	3	0	2	0	2	2	1	0	3	2	2	0	2	1	0
30569	0	0	0	0	0	0	0	6	0	0	0	0	0	0	0	0	2	0	0	0	0	0	0	0	0	5	0	0	0	0	0	0	18	0	0	5	0	0	0	1	1	0	0	0	4	0	0	2	0
510683	0	0	0	5	0	0	13	1	0	1	0	0	0	0	3	1	0	1	0	2	0	4	3	0	0	3	0	0	1	0	0	0	4	3	0	0	3	0	0	0	8	0	2	0	0	1	0	1	1
295094	1	7	0	2	2	9	6	0	2	3	0	4	5	1	0	2	1	6	0	0	7	0	2	16	2	1	4	0	2	0	2	0	1	2	1	3	3	2	0	2	11	0	4	0	4	4	0	2	0
New.ReferenceOTU1937	6	0	2	2	0	5	1	2	0	2	2	1	0	1	8	18	13	0	7	0	8	10	6	3	3	0	7	5	5	3	3	3	0	0	11	4	4	10	8	22	0	7	5	4	1	2	4	0	0
1108599	0	0	0	0	0	0	7	0	0	0	0	0	0	0	0	0	0	0	0	0	0	0	0	0	0	0	1	0	0	0	0	0	4	0	0	0	0	0	0	0	1	0	0	0	0	0	0	0	0
86812	352	36	3	0	19	2	23	0	14	10	0	2	0	0	5	8	50	0	6	0	17	2	19	3	4	2	19	10	6	23	4	6	21	0	12	3	8	2	36	11	0	0	1	20	21	0	11	5	3
New.ReferenceOTU1986	5	3	0	0	3	2	0	0	3	0	0	0	0	0	0	2	0	2	0	1	0	0	0	5	0	0	2	1	0	1	0	0	8	0	3	0	0	0	1	0	0	0	0	4	2	0	0	1	0
11235	40	34	19	0	43	6	7	3	17	12	0	5	10	2	14	33	22	4	9	2	28	3	33	14	12	10	29	11	1	23	6	14	4	2	13	1	14	4	8	5	7	10	4	6	51	8	252	70	27
302158	17	45	13	2	63	0	2	4	18	13	1	0	27	5	9	25	17	0	5	0	54	5	20	5	11	18	28	8	0	11	5	5	13	11	15	5	12	1	8	0	1	0	0	10	14	0	0	0	0
113756	148	95	44	3	163	11	18	30	45	28	4	7	11	8	22	50	40	8	27	7	65	8	57	16	28	35	52	16	3	66	16	15	14	8	55	6	22	5	44	4	1	17	0	20	22	0	0	1	0
833609	2	0	0	0	1	0	0	0	4	0	0	0	0	2	0	0	2	0	0	0	0	0	1	0	0	0	2	0	0	3	1	1	0	0	6	0	0	0	0	0	0	0	2	0	0	0	19	70	1
311173	5	7	4	6	6	0	8	0	0	1	1	0	0	6	64	6	3	1	1	4	7	1	18	16	2	2	9	0	1	3	1	1	1	4	0	0	0	0	11	2	0	0	0	1	19	3	1	1	0
548699	4	2	3	0	0	1	3	2	1	1	0	0	1	0	10	0	3	0	0	1	26	0	2	7	3	11	0	3	0	3	8	0	42	4	0	1	0	0	0	1	0	3	2	1	13	0	0	3	0
74305	1	0	3	0	1	1	0	1	2	0	3	0	14	5	1	0	0	2	12	0	2	0	1	0	1	0	3	0	1	6	8	11	0	0	3	0	0	1	0	0	0	1	0	2	4	3	3	0	4
New.ReferenceOTU2090	0	0	0	0	0	0	0	0	0	0	0	0	0	0	589	0	0	0	0	0	38	1	0	0	120	0	0	4	10	0	0	0	0	0	0	0	115	0	26	95	0	0	0	0	0	0	0	0	0
New.ReferenceOTU1846	5	0	0	3	1	0	4	2	0	0	3	1	4	3	6	2	1	1	4	3	3	5	0	6	0	2	1	0	0	0	2	3	0	0	2	0	6	0	7	0	4	4	1	2	0	0	2	4	0
New.ReferenceOTU1130	6	0	1	0	4	0	0	2	0	0	8	0	0	8	0	1	2	14	0	0	5	0	0	1	0	10	0	0	48	0	5	3	0	5	1	0	0	0	4	2	14	0	8	0	1	2	0	0	36
365496	0	0	0	0	0	0	59	0	0	1	2	5	0	37	4	0	0	670	0	0	0	54	0	0	0	1	30	0	1	0	0	0	0	105	0	0	0	0	3	10	8	0	0	0	1	4	0	0	2
208949	0	0	0	0	0	0	0	0	0	0	43	47	4	55	0	0	0	23	0	0	0	49	0	0	0	0	4	0	8	0	0	0	0	0	0	0	0	0	1	0	2	0	0	0	0	0	0	0	0
2612863	0	0	0	3	0	0	0	0	0	0	5	1	17	1	0	0	0	10	0	2	0	15	0	4	0	0	0	0	8	0	0	0	0	2	0	0	0	0	0	1	0	0	6	0	0	0	0	0	0
158908	0	0	0	2	0	0	5	1	0	0	0	3	2	0	0	0	0	2	2	0	0	7	0	7	0	0	0	0	1	0	0	0	0	9	0	2	0	0	0	2	0	0	138	0	0	6	11	19	15
New.ReferenceOTU807	0	0	0	1	0	0	5	0	2	0	9	2	2	0	2	0	0	4	2	0	0	7	0	7	5	0	0	0	1	0	0	0	0	6	0	1	0	0	0	2	2	0	0	0	0	0	0	0	0
New.ReferenceOTU1677	0	0	0	4	0	0	0	0	0	0	10	4	65	4	0	1	0	10	0	1	0	15	0	1	2	1	0	0	1	0	0	0	0	11	0	2	0	0	0	0	0	0	9	0	2	0	0	0	0
233549	106	26	30	320	0	6	127	9	34	21	774	377	800	104	102	11	8	472	113	59	69	917	39	329	191	14	27	3	249	2	23	17	79	1156	13	41	50	20	3	179	22	29	1	2	51	0	0	0	0
New.ReferenceOTU131	6	0	0	16	0	0	3	0	3	0	22	7	15	3	3	0	0	10	8	2	3	23	1	16	3	0	1	0	14	0	0	0	2	26	0	3	0	1	0	2	4	0	1	0	0	0	0	0	0
New.ReferenceOTU666	0	2	6	0	3	0	0	4	4	5	0	0	0	0	1	3	0	0	3	0	1	0	3	0	2	0	16	0	1	0	0	19	0	0	0	0	0	16	11	0	9	2	14	4	0	9	5	0	7
New.ReferenceOTU1463	1	5	8	0	2	0	0	4	2	2	3	0	0	2	0	4	0	0	0	0	0	0	1	0	0	3	3	13	0	2	0	16	0	0	0	0	6	6	22	0	0	0	0	0	0	7	9	0	17
New.ReferenceOTU2128	25	28	6	3	0	1	3	7	11	10	0	0	0	3	7	0	1	6	11	0	7	0	19	10	5	15	20	0	0	6	2	24	11	0	4	0	0	13	0	2	0	11	10	6	1	0	1	0	15
New.ReferenceOTU2200	7	14	13	5	19	4	0	1	23	25	0	2	0	0	3	7	12	0	2	0	0	1	6	0	0	3	7	5	22	9	3	21	9	0	9	8	11	12	30	3	1	0	7	1	13	5	3	1	2
New.ReferenceOTU2333	3	3	0	0	5	0	0	0	5	0	0	0	0	0	0	1	0	0	3	0	0	0	1	0	0	0	0	1	3	1	0	4	0	0	0	0	2	2	9	0	0	0	6	0	0	2	3	0	8
4426266	0	0	0	0	0	0	0	0	0	0	0	0	0	0	0	0	0	0	0	0	0	0	0	0	0	0	0	0	0	1	0	0	0	0	0	0	0	1	1	0	0	0	8	0	2	3	0	0	8
New.ReferenceOTU119	4	4	4	1	3	2	2	1	1	4	0	0	0	0	0	2	1	0	4	3	4	1	8	0	0	2	1	4	2	4	0	3	0	0	0	0	1	5	8	3	5	0	0	4	1	1	0	0	0
45921	60	195	119	74	149	150	22	32	189	64	6	13	0	5	58	129	271	8	148	28	65	36	199	21	63	21	188	126	63	173	140	118	52	7	84	24	133	251	431	106	251	126	321	145	200	204	46	64	238
1105615	0	0	22	2	3	7	7	6	8	19	0	2	0	0	0	6	1	0	1	4	3	2	2	13	0	10	4	9	2	12	3	9	40	0	4	2	0	10	4	1	5	0	2	3	23	2	5	17	0
49461	12	9	53	38	19	75	31	27	56	38	8	14	7	5	20	24	39	17	48	26	72	18	43	46	23	44	30	3	51	63	63	35	48	12	27	35	22	25	20	48	106	105	23	75	38	15	40	43	5
New.ReferenceOTU2057	0	0	0	0	0	0	6	0	0	0	18	1	0	24	0	0	0	5	0	0	0	5	0	0	0	0	0	0	4	0	0	0	0	9	0	0	0	0	1	4	0	0	0	0	0	0	0	0	0
351231	0	0	0	0	0	0	163	3	0	0	241	66	1	403	21	0	0	102	0	0	0	84	0	0	0	0	1	0	31	0	0	0	0	115	0	0	0	1	15	10	0	2	0	0	0	0	0	0	9
513445	0	0	0	0	0	0	0	0	0	0	0	0	0	0	0	0	0	0	0	0	0	0	0	0	0	0	0	3	0	0	0	0	0	0	0	0	0	0	0	0	0	0	2	0	0	0	0	0	0
589277	7	0	0	0	1	0	0	0	0	2	8	0	6	82	0	0	0	34	0	0	1	36	0	0	0	1	2	0	1	0	2	0	0	0	0	0	0	0	2	0	141	0	0	0	0	0	0	0	0
589071	1	0	7	0	0	0	0	0	0	1	0	0	0	3	0	0	0	0	0	0	0	0	0	0	0	0	5	0	0	0	0	0	0	1	0	0	0	0	2	0	50	0	2	0	0	0	0	0	0
New.ReferenceOTU544	19	4	11	0	11	5	0	10	9	2	0	4	4	1	3	2	4	0	1	0	0	0	12	1	1	8	11	5	1	23	13	14	6	0	20	5	4	6	3	3	0	3	2	1	17	0	4	9	11
522595	0	0	0	3	0	0	0	0	0	0	0	0	0	1	0	0	0	1	0	0	0	7	0	0	0	1	2	0	1	0	0	0	1	0	0	1	0	0	0	0	0	0	0	0	0	1	0	0	62
158215	0	0	2	6	0	0	0	4	0	0	0	0	0	15	0	0	0	31	3	0	0	74	10	3	0	5	2	0	48	0	0	0	16	5	0	4	1	0	3	0	1	1	0	0	0	0	0	0	0
28056	3	11	2	0	19	1	0	2	7	0	0	0	0	0	0	2	9	0	0	0	0	0	14	0	0	11	9	9	0	7	2	6	1	0	9	0	20	3	12	5	0	0	24	3	36	2	13	2	4
New.ReferenceOTU1608	12	8	2	0	4	1	0	3	1	2	0	0	0	0	0	0	21	0	2	0	0	0	5	0	0	3	1	7	9	2	26	7	2	0	5	0	0	2	19	0	34	4	16	0	18	11	6	3	7
New.ReferenceOTU2386	4	3	0	0	6	1	0	0	0	0	0	0	0	0	0	0	5	0	0	1	0	0	1	0	0	0	0	0	0	0	32	3	0	0	1	0	0	0	0	0	2	4	2	0	0	7	2	0	0
New.ReferenceOTU474	0	0	0	0	0	0	0	0	1	0	0	0	0	0	0	0	2	0	0	0	0	0	0	0	0	0	0	0	0	0	7	0	0	0	0	0	0	0	1	0	2	0	1	0	3	10	5	4	4
198866	0	0	0	0	0	0	0	0	0	1	0	0	0	4	0	0	0	5	0	0	0	0	0	0	0	0	0	0	0	0	0	0	0	0	0	0	0	0	0	0	15	0	0	0	0	0	0	0	0
New.ReferenceOTU1150	3	2	5	0	6	2	1	3	3	4	1	1	0	0	1	0	3	0	2	0	2	1	6	3	0	1	1	2	0	3	7	3	2	1	0	0	2	3	1	4	0	0	3	1	2	0	0	0	0
New.ReferenceOTU1155	1	5	1	0	0	2	2	0	9	4	0	0	0	2	5	5	2	0	1	1	2	0	7	0	1	0	3	6	0	2	4	5	0	3	0	0	2	3	3	0	0	0	1	2	2	0	0	0	2
513985	4	7	5	1	1	2	3	0	2	2	1	1	1	0	1	2	0	2	0	3	3	3	3	1	3	0	2	5	0	8	5	1	2	1	5	0	3	9	2	1	0	0	0	1	6	0	0	0	1
520075	28	26	43	80	24	22	13	40	19	16	17	32	6	19	34	30	10	4	36	67	27	61	12	12	24	43	51	15	26	18	50	15	29	7	42	13	33	39	24	16	1	68	20	12	33	32	61	30	21
New.ReferenceOTU763	8	5	0	0	11	6	5	0	3	5	0	0	0	0	0	2	10	1	3	0	0	2	9	0	0	0	2	3	0	1	3	5	2	0	0	0	2	2	2	0	0	2	4	2	3	0	2	0	5
918187	2	3	6	0	4	3	2	0	0	12	0	1	0	0	0	1	6	0	0	0	5	1	0	2	2	3	3	0	0	1	3	4	2	0	2	1	0	4	0	4	0	4	4	0	3	0	8	0	7
510205	14	18	19	11	14	50	19	9	25	35	6	11	4	6	20	7	30	13	13	6	19	3	17	17	17	9	22	18	15	14	37	30	15	2	18	4	4	59	9	12	3	48	13	3	27	11	14	21	10
921813	16	28	3	0	4	4	5	1	14	22	0	2	0	0	3	8	8	0	2	2	8	1	12	1	3	7	8	14	2	11	8	18	5	3	8	7	2	6	13	1	0	3	17	2	11	35	16	11	42
New.ReferenceOTU1244	70	100	120	2	68	88	23	27	105	196	6	13	9	17	38	46	89	8	29	16	95	54	80	76	33	40	118	112	14	85	83	96	66	5	80	50	34	138	71	45	3	41	51	45	117	41	76	60	102
New.ReferenceOTU2101	28	1	0	0	3	13	1	2	0	2	0	3	0	2	9	20	22	1	4	0	7	2	2	20	8	0	5	0	10	3	0	1	0	0	8	1	5	2	5	21	0	8	3	10	1	1	1	0	3
New.ReferenceOTU545	9	0	6	2	4	3	9	0	7	0	3	13	0	0	11	1	4	2	8	0	0	0	6	0	12	1	3	0	29	3	7	0	0	0	0	1	2	6	1	72	0	0	14	0	0	0	1	0	0
New.ReferenceOTU2278	0	0	0	0	0	2	0	0	0	0	0	0	0	0	0	1	0	0	0	0	0	0	0	2	0	0	0	0	0	0	0	0	4	0	0	0	0	0	0	0	2	0	29	1	0	8	7	0	20
New.ReferenceOTU372	25	58	21	13	74	36	12	16	13	9	21	6	23	23	44	66	57	18	28	9	50	12	23	60	8	11	27	38	31	12	39	15	40	12	34	34	24	12	13	66	26	16	28	6	45	2	12	2	12
325388	0	2	4	4	0	4	3	4	19	2	1	0	0	0	4	3	0	2	10	0	0	0	1	0	0	3	8	0	11	2	0	4	0	0	0	0	4	3	1	7	2	0	1	4	8	11	4	0	2
100852	1	1	0	0	0	0	0	0	0	0	0	0	0	0	0	0	1	0	0	0	0	0	1	0	2	1	0	2	0	0	0	0	1	0	1	0	0	0	1	0	0	1	2	0	1	0	15	4	2
529173	29	21	4	0	30	0	1	12	8	8	4	2	0	7	7	19	21	0	8	0	6	0	11	7	1	30	5	1	0	22	2	6	14	0	3	24	5	9	0	10	0	2	6	11	6	3	28	6	5
New.ReferenceOTU318	0	6	0	0	6	0	4	4	11	4	0	0	0	0	2	1	0	0	13	0	4	0	0	0	0	1	0	0	0	2	0	4	3	0	1	2	0	4	0	0	0	3	0	3	3	0	0	0	0
102513	4	90	54	16	65	17	2	6	88	42	7	0	0	35	14	18	28	13	27	22	21	13	55	30	7	60	43	32	8	56	19	48	179	1	22	35	43	116	44	50	0	4	45	76	28	49	34	19	36
New.ReferenceOTU2331	35	1	2	1	8	3	12	10	1	7	5	7	115	34	0	4	16	30	71	117	8	42	1	7	0	11	2	0	0	1	1	0	12	1	19	430	9	4	0	18	2	7	4	4	0	4	4	128	0
New.ReferenceOTU1008	18	110	21	89	25	137	34	46	102	40	55	62	199	9	35	82	228	13	84	20	148	10	345	291	9	277	76	14	40	61	80	39	77	33	45	96	28	42	53	80	76	195	80	49	57	90	44	40	10
355246	4	0	0	1	0	0	0	0	0	0	14	0	11	10	0	0	0	22	0	0	0	16	0	0	0	0	0	0	19	0	0	0	0	48	0	0	2	0	0	25	0	0	0	0	0	0	0	0	0
157805	0	0	0	14	0	0	7	0	0	0	31	52	105	1	9	0	0	61	5	0	21	27	1	16	13	0	4	1	17	0	0	0	0	16	0	0	9	0	0	14	0	0	5	0	0	1	0	0	0
New.ReferenceOTU1022	0	0	0	0	0	0	0	0	0	0	0	0	0	0	0	0	0	0	1	0	0	0	0	0	0	0	2	0	0	2	0	1	1	0	0	0	0	0	0	0	0	0	1	0	0	14	4	1	4
New.ReferenceOTU1617	6	4	34	2	39	16	4	13	17	19	0	0	1	11	13	1	8	2	6	1	6	12	13	14	14	4	49	137	7	12	2	23	48	0	58	26	20	17	3	3	3	15	0	0	1	9	13	5	1
844589	0	0	3	0	0	0	2	11	0	4	1	0	15	0	0	0	0	0	0	0	0	1	0	6	0	3	0	0	0	0	2	0	6	0	1	12	0	0	0	0	0	1	0	0	2	0	0	10	0
New.ReferenceOTU1975	32	12	138	0	0	195	24	44	1	167	2	0	6	8	1	20	6	3	4	2	49	2	46	145	4	11	77	10	5	22	166	10	52	0	38	107	3	17	1	25	0	0	0	22	15	11	21	40	52
New.ReferenceOTU454	6	4	16	3	7	8	3	11	14	8	5	3	4	3	5	2	2	1	4	7	30	7	6	8	6	15	16	18	0	4	0	5	22	0	0	15	2	20	8	1	0	4	2	7	19	3	6	26	10
New.ReferenceOTU2095	5	0	0	0	0	0	0	8	2	3	0	0	0	2	0	6	0	0	3	0	0	0	1	9	0	5	0	9	0	8	5	6	3	0	4	22	0	1	4	0	4	0	9	0	7	1	6	29	23
New.ReferenceOTU832	0	0	3	1	5	1	0	4	5	1	0	0	0	0	0	4	1	0	0	1	0	1	0	9	1	3	1	4	0	0	0	0	0	0	5	3	2	3	0	0	13	0	0	0	3	1	2	0	1
New.ReferenceOTU2227	2	1	0	0	0	15	0	0	1	2	3	1	0	0	0	9	12	5	0	0	1	0	10	0	0	3	4	4	0	7	2	13	0	0	6	0	7	10	0	0	0	5	2	0	7	3	3	6	1
New.ReferenceOTU1680	3	0	0	12	11	0	0	0	2	0	0	0	0	0	1	0	0	0	0	2	0	0	0	0	0	0	2	2	0	2	0	5	0	0	0	0	0	4	0	0	0	0	0	0	0	0	0	0	0
New.ReferenceOTU1369	1	0	1	6	6	0	0	2	0	0	0	0	0	3	1	4	0	0	0	3	0	0	0	0	0	4	2	6	0	0	0	1	0	0	1	0	1	5	0	2	0	0	0	0	0	1	1	0	2
New.ReferenceOTU2094	0	1	0	0	6	0	0	0	8	0	0	0	0	0	3	0	0	0	0	0	0	0	0	0	0	0	0	9	0	7	0	4	0	0	0	0	0	4	0	1	0	0	0	0	0	1	0	0	0
New.ReferenceOTU723	22	55	17	20	17	64	10	57	35	176	0	5	5	2	40	63	82	0	45	4	29	16	17	43	8	16	17	34	11	57	167	41	70	3	37	65	7	47	18	15	30	19	3	55	51	27	47	133	36
577228	411	90	293	27	15	52	132	74	113	190	39	7	156	115	27	17	49	14	101	213	158	144	47	203	26	90	226	14	5	207	59	25	186	65	121	261	5	100	16	34	21	95	2	129	123	5	9	541	82
940433	0	5	1	0	0	0	0	0	0	0	0	0	0	0	0	0	1	0	4	0	0	2	0	0	0	0	0	2	0	3	0	2	4	0	2	0	1	0	2	0	0	0	0	0	1	4	9	10	12
New.ReferenceOTU2017	78	75	43	27	106	60	0	54	60	200	0	1	8	0	21	36	20	0	99	117	26	8	97	17	0	51	65	230	0	189	21	141	105	0	114	17	32	91	48	8	0	53	9	301	109	29	75	121	71
New.CleanUp.ReferenceOTU6807	1	0	0	5	0	2	2	0	0	0	1	2	1	0	0	0	0	0	0	0	2	0	5	0	0	0	1	0	0	0	0	0	8	3	1	5	0	0	0	0	0	1	0	0	0	0	0	0	0
New.ReferenceOTU669	15	27	32	58	10	5	2	25	22	4	1	0	1	1	12	27	26	0	0	31	16	35	17	3	10	28	38	30	3	26	39	29	48	8	15	25	20	33	14	21	2	47	31	5	47	19	22	105	100
New.ReferenceOTU1041	0	44	1	17	8	40	82	28	92	17	0	5	1	2	2	15	80	0	34	40	3	10	60	12	1	14	7	6	2	56	59	59	62	8	22	26	2	33	5	13	0	97	7	26	111	7	54	53	28
293013	45	41	68	142	56	208	13	177	60	9	18	4	56	24	49	84	142	2	25	88	118	143	260	26	40	114	95	150	55	71	276	93	103	57	121	233	37	45	45	61	1	172	108	24	129	183	65	195	119
1067655	0	9	1	3	3	0	0	16	16	0	6	0	0	1	0	18	0	2	25	6	2	17	2	0	2	25	6	12	13	40	2	60	0	0	1	0	22	52	8	1	0	0	31	0	13	28	14	1	21
New.ReferenceOTU1789	10	3	22	0	9	5	4	2	1	9	0	0	2	2	0	1	20	0	0	0	25	5	6	12	0	0	21	8	3	0	5	2	2	0	5	11	0	2	0	2	77	4	6	0	31	0	12	25	38
New.ReferenceOTU2612	9	6	0	0	14	0	0	0	1	24	0	0	0	0	1	0	0	0	9	1	0	0	0	0	1	0	0	0	0	14	0	8	0	0	0	0	3	30	0	0	0	0	0	17	0	3	24	0	0
New.ReferenceOTU2587	1	2	0	0	0	0	0	0	0	7	0	0	0	0	0	0	3	0	0	0	0	0	0	0	0	5	0	17	0	4	0	0	2	0	8	6	0	1	2	2	0	0	0	0	0	0	0	0	6
522591	20	40	2	1	21	2	21	18	16	113	3	2	8	2	3	4	6	0	12	3	13	0	11	79	1	15	2	10	6	9	2	8	28	0	5	12	1	32	23	1	3	42	17	42	15	5	6	33	34
New.ReferenceOTU1573	0	0	5	0	0	0	0	0	1	0	1	0	0	0	0	2	0	0	0	0	0	1	2	0	0	0	2	0	0	1	0	0	0	0	2	3	0	2	0	0	0	0	0	0	0	0	0	0	0
New.ReferenceOTU2369	0	0	0	108	0	0	0	0	0	0	0	0	0	0	0	0	0	0	0	2	20	5	0	0	0	0	0	0	0	0	0	0	0	0	0	0	0	0	0	0	0	0	0	0	0	4	0	0	1
16915	262	156	571	319	102	319	54	446	308	233	95	213	303	60	69	317	40	42	129	476	464	466	103	343	83	338	437	236	327	207	101	100	148	84	144	92	86	353	118	326	22	178	154	356	127	64	588	73	158
911254	61	63	144	76	72	265	132	211	185	100	23	14	38	21	109	99	80	10	145	87	46	129	125	46	133	245	127	197	50	85	112	192	161	7	100	122	67	180	68	72	14	123	11	155	122	49	96	271	91
332527	0	0	3	11	0	0	4	1	0	1	1	2	12	0	0	4	0	6	0	4	1	1	7	6	2	1	3	0	0	0	4	0	2	4	2	0	4	0	0	6	0	5	81	1	0	5	113	9	2
350071	83	3	70	77	1	48	85	3	13	36	77	186	107	25	38	96	19	122	21	97	43	40	79	149	29	12	92	16	67	0	2	3	63	90	60	19	83	4	26	53	0	162	31	27	31	3	4	4	2
908071	9	153	66	74	55	33	5	157	164	62	4	7	45	33	90	38	145	3	82	51	66	62	257	13	132	71	65	99	54	84	29	177	105	2	66	15	41	128	84	56	0	115	13	150	25	78	89	47	100
New.ReferenceOTU197	1	2	1	2	3	2	0	2	5	0	0	0	6	2	4	0	1	0	1	2	4	1	2	1	6	5	0	0	1	2	0	4	0	0	0	0	0	1	1	6	0	4	0	6	4	7	0	0	0
298358	68	337	340	631	57	239	124	183	317	601	75	301	9	83	309	500	112	69	239	82	261	366	208	21	691	109	418	106	442	187	39	183	40	122	571	285	304	88	479	553	0	573	181	876	204	247	207	133	146
New.ReferenceOTU1536	0	14	6	13	2	2	3	5	7	20	2	7	0	0	8	9	2	1	9	0	5	4	4	0	11	2	11	2	9	3	1	8	0	3	3	2	8	3	13	14	0	17	0	19	5	0	0	0	0
New.ReferenceOTU2311	12	17	16	22	4	16	6	8	27	54	0	8	18	1	14	12	11	0	10	32	20	24	3	5	35	7	7	1	5	19	16	16	22	0	6	4	10	24	2	2	6	5	4	6	2	3	5	24	1
New.ReferenceOTU2604	0	0	0	0	0	0	0	0	2	0	0	7	0	0	0	0	0	0	0	0	0	0	0	0	0	0	0	0	0	0	0	0	0	0	0	0	0	1	0	0	0	0	189	0	0	17	4	2	13
New.ReferenceOTU853	30	102	32	98	47	39	27	5	96	129	25	1052	18	35	66	13	8	25	89	192	32	57	52	23	155	13	40	11	137	62	31	76	47	362	47	8	80	98	12	209	9	84	48	222	13	11	4	0	1
New.ReferenceOTU96	0	0	0	0	0	0	0	0	0	0	0	0	11	0	0	0	0	0	0	0	0	0	0	0	0	0	0	0	0	0	0	0	0	0	0	0	0	0	0	0	0	1	4	0	0	0	0	9	0
733799	12	0	0	0	0	43	270	2	4	4	31	188	791	0	0	0	18	31	1	0	17	0	37	47	0	0	0	0	0	0	7	1	158	111	0	52	1	0	0	0	11	82	7	5	7	0	0	10	0
New.ReferenceOTU727	3	17	11	0	7	19	1	4	17	26	0	1	1	3	19	2	5	0	0	12	9	7	1	6	5	7	8	7	2	3	8	20	9	0	8	7	1	23	3	7	0	9	3	14	3	0	15	3	18
New.ReferenceOTU1896	8	39	28	12	15	5	5	41	51	2	0	4	1	0	9	10	2	5	9	9	19	17	24	0	33	27	40	20	2	37	0	20	18	0	52	24	13	24	17	11	0	42	3	12	14	17	15	86	25
552031	5	3	1	1	13	3	27	6	17	4	0	4	18	13	12	5	6	19	28	8	7	8	3	2	9	2	10	2	2	1	0	35	3	4	1	13	3	18	3	0	2	3	0	3	3	0	0	4	0
New.ReferenceOTU127	30	123	13	28	78	15	26	18	188	95	2	11	18	18	48	14	25	3	31	81	24	59	19	38	51	12	23	37	6	65	1	26	55	17	24	26	22	96	17	14	0	6	5	42	33	14	21	23	14
New.ReferenceOTU1081	3	26	0	17	13	0	6	0	39	1	0	8	0	0	24	4	0	0	17	20	4	14	17	0	61	0	0	3	0	39	0	40	0	0	1	0	28	14	12	0	0	9	0	1	0	12	3	0	15
3510697	83	133	101	44	132	34	27	27	161	74	3	23	28	12	54	168	33	11	148	101	104	43	86	93	149	44	107	26	34	138	14	46	25	10	44	93	94	131	59	50	391	51	121	69	72	100	67	60	89
907916	3	23	0	1	12	1	0	0	17	5	0	0	0	0	8	1	0	0	2	13	12	1	1	0	21	2	0	0	7	5	1	1	0	0	0	0	6	5	0	0	9	0	11	0	0	25	10	10	11
515590	26	0	0	0	0	1	15	0	0	9	0	1	21	0	0	0	4	0	0	0	16	0	3	3	0	1	3	0	0	0	0	0	0	13	2	5	0	0	2	0	0	0	0	3	3	0	0	3	0
New.ReferenceOTU597	4	0	1	0	1	0	0	0	2	5	1	0	0	0	0	0	1	0	0	2	1	0	0	0	0	1	0	0	0	0	1	0	3	0	4	1	0	0	0	0	0	8	0	1	6	0	0	0	0
516366	52	22	59	7	10	26	117	23	52	34	25	10	17	17	4	3	11	16	33	28	39	7	19	28	7	24	21	5	0	13	17	1	82	0	39	102	18	10	2	11	8	75	0	2	47	1	2	87	0
New.ReferenceOTU2268	0	0	0	0	0	0	0	0	0	0	0	0	0	0	0	0	0	0	0	0	0	0	0	0	0	0	0	0	0	0	0	0	0	0	0	0	0	0	0	0	0	0	13	0	0	1	8	5	1
New.ReferenceOTU288	83	18	8	5	24	10	8	5	10	2	3	5	15	6	1	9	31	4	12	4	24	7	10	70	3	16	5	8	4	29	16	15	14	8	4	31	12	5	9	20	21	12	25	3	27	3	9	2	8
New.ReferenceOTU1063	2	0	0	0	0	0	0	0	0	0	0	0	0	2	2	2	5	0	0	0	0	5	0	0	2	0	0	0	0	0	0	0	0	0	0	0	0	0	5	0	0	0	0	0	0	1	6	0	5
New.ReferenceOTU1919	2	0	1	5	5	13	18	4	13	7	5	7	0	4	6	26	16	1	6	0	11	2	8	8	2	11	9	26	5	7	0	18	9	0	5	10	8	14	11	4	2	4	2	2	15	2	12	3	2
52441	14	105	88	64	114	127	51	41	62	63	8	3	11	13	37	110	162	3	77	20	100	50	146	30	62	70	94	72	44	50	191	118	49	10	122	56	62	143	132	91	0	164	70	122	153	59	90	69	105
New.ReferenceOTU2704	5	9	27	16	34	6	1	24	8	2	3	6	2	1	0	7	7	0	5	4	42	7	62	2	7	11	55	16	24	10	39	6	35	0	6	55	13	14	24	24	18	0	89	2	23	15	16	6	22
New.ReferenceOTU1269	5	8	2	10	7	11	7	4	9	13	0	0	2	0	4	3	5	0	17	0	6	8	3	8	1	6	6	14	4	9	4	5	4	0	6	23	4	17	8	0	3	12	2	19	6	7	5	5	5
651458	52	300	118	235	228	280	46	230	256	222	6	25	63	15	113	119	157	18	271	64	205	257	207	289	135	221	126	152	35	383	60	270	360	12	176	327	204	389	102	62	101	274	72	341	303	115	82	192	81
New.ReferenceOTU1029	0	9	1	5	2	5	1	4	10	2	1	0	0	0	0	3	3	0	1	0	3	11	0	5	0	5	8	2	0	9	4	3	8	0	1	3	7	12	1	2	2	6	0	4	4	0	1	0	0
New.ReferenceOTU168	0	2	0	2	3	0	0	0	0	2	0	0	1	0	0	5	2	0	1	3	1	0	4	4	0	2	2	2	2	4	0	0	0	0	1	1	1	5	0	0	1	7	0	0	0	3	1	0	5
New.ReferenceOTU1484	3	1	0	1	1	0	0	0	2	0	0	0	2	0	0	0	2	0	3	0	0	0	0	0	0	4	2	0	0	3	0	2	2	0	0	0	2	1	1	0	0	2	2	6	0	3	3	1	0
352943	2	0	17	3	0	2	2	9	5	27	28	20	39	20	0	49	27	3	5	0	7	17	4	27	0	2	7	0	0	0	25	5	5	50	32	11	2	2	1	8	0	12	10	11	0	0	8	1	0
1092802	72	162	168	145	93	206	56	253	210	223	5	38	15	17	115	150	104	14	264	146	219	116	189	124	113	188	235	65	138	173	112	87	150	17	171	152	117	423	139	159	78	160	32	297	168	21	124	105	50
New.ReferenceOTU735	15	30	45	99	45	9	61	6	8	0	92	112	276	29	18	11	6	42	42	3	52	513	6	115	112	26	48	5	44	5	7	0	95	10	16	28	56	36	79	201	25	10	46	18	70	4	30	21	5
New.ReferenceOTU1131	1	0	0	10	0	0	0	0	0	0	26	0	4	1	0	1	0	19	3	0	3	3	0	9	0	0	10	0	0	0	4	0	0	0	4	0	1	5	0	0	3	13	25	0	0	0	0	0	1
40523	0	8	6	1	9	0	0	0	0	0	0	0	0	3	0	6	0	0	3	0	0	0	0	0	0	29	5	50	4	2	0	0	0	0	1	0	0	0	26	3	0	0	4	0	10	7	20	5	9
1027100	0	2	0	1	0	0	0	0	2	0	0	0	1	2	0	14	0	0	8	0	0	0	0	3	1	2	2	3	0	0	0	0	5	0	0	1	0	2	2	8	0	0	1	1	2	0	0	0	4
New.ReferenceOTU1939	1	10	10	3	2	7	0	6	7	3	5	2	2	0	8	15	8	0	1	9	2	0	9	3	12	8	3	0	7	18	1	0	0	0	8	6	11	3	2	35	0	2	10	2	0	1	6	0	20
322732	0	0	0	0	0	0	0	0	0	0	0	0	0	0	103	0	0	0	0	0	0	0	0	0	89	0	0	54	0	0	0	0	0	0	0	0	105	0	130	0	0	0	0	0	0	0	0	0	0
New.ReferenceOTU1124	1	4	3	0	9	0	0	1	0	0	0	0	0	1	0	2	2	0	0	0	0	1	1	0	0	4	5	1	1	1	0	4	0	0	11	1	0	0	3	0	0	0	6	0	8	0	3	1	0
299713	3	11	0	1	12	0	0	2	41	1	0	0	0	0	4	15	1	0	33	6	0	0	1	0	2	8	4	6	0	17	0	39	0	0	9	5	7	27	11	1	0	0	0	0	2	9	5	1	2
16733	2	61	55	44	26	2	2	42	145	0	0	0	0	10	38	88	14	0	140	36	16	6	29	0	45	89	89	32	4	109	3	182	14	5	63	18	39	99	98	39	0	0	20	6	40	146	26	29	11
45529	0	7	0	2	7	17	0	0	9	3	1	0	0	0	10	2	4	0	3	0	4	0	4	8	3	15	2	6	5	4	5	4	6	0	1	7	1	2	2	1	0	0	0	1	10	3	5	0	3
New.ReferenceOTU1619	98	181	152	286	197	423	151	53	183	127	26	144	8	22	68	157	153	63	68	205	145	412	97	179	174	42	415	52	205	226	89	84	172	70	39	82	319	305	219	329	1	291	96	91	56	246	149	25	209
New.ReferenceOTU319	8	0	0	0	0	0	0	0	0	11	0	0	0	0	0	2	0	0	4	0	0	1	0	0	0	0	1	1	0	2	1	1	0	0	0	5	0	0	0	3	0	0	15	0	0	3	0	0	1
New.ReferenceOTU940	4	0	1	9	1	0	0	1	1	0	0	0	0	0	0	0	0	0	0	1	2	2	0	0	0	5	0	0	0	0	0	0	1	0	7	0	0	0	0	2	3	0	0	0	1	0	3	0	0
New.ReferenceOTU1471	8	5	2	0	0	0	0	0	0	7	0	1	0	0	0	0	0	0	7	8	0	0	1	0	6	1	2	0	0	5	0	5	0	0	5	0	6	13	2	0	0	4	0	9	0	0	0	0	0
560746	1	1	2	2	0	0	6	0	2	6	0	3	0	0	2	0	0	0	7	1	2	0	1	0	15	0	1	0	0	1	0	10	0	0	1	0	4	5	1	2	0	2	0	6	0	0	0	0	0
289468	0	3	1	0	0	0	2	0	8	17	1	12	0	0	9	2	0	0	27	16	4	0	1	0	9	0	2	0	7	2	0	4	0	0	5	0	18	5	3	7	0	4	49	20	0	3	24	0	9
315271	12	129	78	75	30	2	170	9	239	661	2	483	1	0	562	85	0	0	616	378	39	13	26	1	464	0	179	13	105	136	1	285	4	2	220	0	321	297	74	105	1	182	19	427	0	22	6	0	1
4435235	10	4	12	40	11	3	11	37	9	3	0	22	0	0	4	32	2	1	2	20	10	28	0	1	2	38	21	19	14	15	0	2	43	2	32	14	4	10	13	49	126	9	19	7	6	19	18	5	11
319810	1	0	0	0	1	3	2	1	0	0	0	2	1	0	1	1	4	0	2	0	3	0	0	3	0	8	1	2	0	1	0	0	1	0	0	0	0	1	0	0	1	0	0	0	3	2	4	0	0
68838	0	57	0	0	0	0	0	0	7	0	0	0	0	0	0	60	0	0	3	0	0	0	0	0	0	0	0	23	0	107	0	15	0	0	0	0	0	0	20	0	0	0	0	0	0	16	36	0	4
303112	7	0	0	0	5	1	1	2	0	0	1	0	1	2	0	0	4	2	2	2	2	2	0	1	1	2	1	3	0	1	5	0	4	1	0	11	0	0	1	2	0	1	1	0	0	0	1	1	2
346868	205	86	94	82	209	191	318	195	26	57	30	57	62	30	13	164	398	23	49	143	146	70	107	123	11	336	65	173	1	95	101	97	253	66	181	499	13	43	45	98	87	105	17	40	210	76	215	235	86
New.ReferenceOTU638	12	0	0	0	1	0	1	2	0	3	0	0	2	0	0	5	5	0	0	0	2	0	0	0	0	7	0	7	0	4	0	3	4	0	3	2	0	0	0	1	4	0	0	2	5	4	12	9	6
New.ReferenceOTU1429	4	0	1	2	0	0	5	6	0	2	0	2	0	0	0	1	6	0	0	0	2	1	0	4	0	8	3	5	0	1	2	3	3	0	0	5	0	0	1	3	0	4	0	0	0	0	5	1	0
New.ReferenceOTU1134	4	1	2	0	0	0	0	0	0	0	0	0	3	0	0	0	4	0	0	2	0	0	0	0	0	0	3	0	0	0	1	0	10	0	5	2	0	0	0	0	3	1	1	0	0	1	5	0	0
248447	2	35	2	24	50	0	0	13	28	19	0	25	1	3	6	12	9	1	29	17	4	16	5	0	7	19	22	4	2	24	5	28	32	8	17	16	9	28	40	5	0	7	11	7	29	71	22	30	14
589329	1075	98	3	3	242	46	36	22	45	55	88	13	43	37	0	6	41	57	17	14	56	8	14	42	0	29	2	40	3	35	3	9	128	12	69	141	8	15	20	4	53	8	0	2	108	1	3	7	0
New.ReferenceOTU1778	23	0	0	0	0	0	2	3	1	0	0	0	0	0	0	0	1	0	0	1	0	0	0	7	0	0	0	0	0	4	0	0	3	0	3	1	1	1	0	0	0	0	0	0	1	0	0	0	0
New.CleanUp.ReferenceOTU20521	10	3	0	0	0	1	0	2	1	0	0	0	1	2	0	0	10	1	0	0	3	0	1	0	0	3	0	0	0	1	1	3	1	0	3	3	1	0	0	1	0	0	0	0	1	0	0	27	0
568118	344	41	11	0	8	76	43	21	30	9	5	2	10	8	0	1	44	13	8	6	24	6	11	44	0	140	4	37	0	37	1	10	34	5	44	112	9	16	1	0	2	3	3	1	114	5	29	237	1
New.ReferenceOTU2019	41	5	3	0	0	9	1	3	6	1	0	0	2	0	0	0	10	0	3	0	5	1	2	5	1	3	0	6	0	8	0	0	2	3	6	6	1	1	0	1	0	0	0	0	15	0	0	2	0
588929	174	36	1	0	4	15	5	11	14	5	2	3	10	6	0	4	15	6	1	0	7	1	4	19	0	73	0	13	2	8	4	3	17	4	7	41	1	3	1	0	5	2	0	1	17	0	0	0	0
324283	38	6	0	0	23	53	14	0	5	26	0	3	43	0	4	0	104	0	0	29	0	0	16	244	0	0	0	0	0	65	13	5	6	0	0	2	0	7	0	0	0	30	0	8	0	0	0	1	0
288250	27	13	33	7	53	33	3	18	4	29	4	11	0	3	0	16	88	0	7	0	7	5	18	11	0	17	34	5	0	4	26	5	4	7	13	49	2	16	54	6	13	4	133	18	5	2	10	0	28
New.ReferenceOTU1367	3	37	10	4	1	0	3	12	4	13	0	3	1	0	0	3	1	0	2	0	0	5	8	0	0	18	17	30	3	0	5	6	0	1	5	0	0	5	318	4	12	0	13	3	18	2	0	0	3
547854	50	41	27	104	23	34	77	83	103	56	170	51	63	171	3	2	21	61	49	89	28	55	43	73	12	86	11	32	9	95	17	88	78	52	82	235	24	36	43	38	2	78	6	12	90	9	5	237	12
567226	82	5	11	0	5	22	0	59	25	0	0	0	0	0	0	7	4	0	9	0	7	1	2	67	0	150	3	42	0	45	1	15	130	1	36	149	1	12	2	0	22	10	1	0	63	12	4	63	6
New.ReferenceOTU280	0	0	0	0	0	0	0	0	0	0	0	0	0	0	0	0	0	0	0	0	0	0	0	0	0	0	0	0	0	0	0	0	0	0	0	0	0	0	2	0	0	0	6	0	0	0	7	45	4
New.CleanUp.ReferenceOTU3136	15	4	2	1	38	2	5	3	2	21	0	0	0	0	0	4	45	1	1	0	6	7	18	1	0	7	4	31	0	10	7	10	17	0	20	9	4	0	33	0	1	6	0	3	21	0	0	0	0
New.ReferenceOTU2428	0	0	0	0	0	0	0	0	0	0	0	0	0	0	0	0	0	0	0	0	0	0	0	0	0	0	0	0	0	1	0	1	0	0	0	0	0	1	9	0	0	0	39	0	0	1	6	0	37
New.CleanUp.ReferenceOTU22295	0	13	5	2	46	0	0	0	8	1	0	0	0	0	4	0	0	0	1	0	0	0	0	0	0	1	3	41	0	26	0	37	0	0	26	0	3	11	101	0	0	0	0	5	14	0	0	0	0
47554	19	10	20	1	22	29	0	19	7	4	1	2	2	1	1	0	81	0	8	0	26	9	29	2	0	6	28	19	1	28	8	11	37	0	41	47	0	2	4	9	0	2	95	40	50	0	2	6	48
New.ReferenceOTU1165	0	0	0	0	9	0	0	0	31	0	0	0	0	0	0	0	0	0	0	0	0	0	0	0	1	0	0	15	0	2	0	9	0	0	0	0	2	0	8	0	0	0	0	0	0	0	0	0	14
New.ReferenceOTU642	18	48	31	25	54	41	2	35	16	70	0	29	0	8	33	25	190	0	6	0	47	6	47	17	18	39	25	180	10	31	72	33	63	15	60	115	47	8	237	98	2	41	0	49	11	0	0	1	1
New.ReferenceOTU1045	0	1	0	0	0	0	0	0	0	1	0	1	0	0	0	0	1	0	0	0	1	0	0	0	1	0	1	1	0	0	0	0	2	0	0	4	1	0	5	0	0	0	102	0	0	36	23	100	114
925131	34	0	0	0	0	0	0	0	0	0	0	0	0	0	0	0	0	0	0	0	0	0	0	10	0	0	2	0	0	0	2	0	4	0	2	7	0	0	0	0	0	0	0	0	0	0	0	8	0
300859	8	0	0	0	0	0	0	0	0	0	4	0	0	0	0	0	0	0	1	0	2	0	0	0	0	4	0	0	0	0	0	1	1	0	0	0	0	0	0	0	0	0	0	0	0	0	6	11	12
530854	65	2	1	0	3	3	15	0	10	4	3	0	3	11	0	3	2	0	4	0	0	3	1	11	0	4	4	3	0	1	0	4	7	3	7	34	0	0	0	0	0	7	0	1	7	0	0	0	0
956050	17	27	5	6	19	6	0	2	11	27	2	0	0	0	2	0	3	0	4	0	1	0	0	3	0	19	1	10	0	20	0	34	5	0	2	5	5	1	0	2	1128	0	10	5	19	17	4	2	94
New.ReferenceOTU1098	6	5	3	0	1	0	0	0	0	3	0	0	0	0	0	0	4	0	0	0	0	0	2	0	0	2	5	0	0	0	21	2	2	0	0	1	0	0	1	2	0	1	9	4	2	1	20	22	4
New.ReferenceOTU394	5	5	3	3	5	0	1	2	0	1	0	0	0	0	0	0	3	0	0	0	3	1	0	0	1	3	0	0	0	2	0	4	2	0	0	0	1	3	5	0	30	0	0	3	0	0	1	0	7
New.ReferenceOTU1990	21	35	4	1	155	0	3	6	10	0	0	0	0	0	28	2	5	0	0	3	1	5	0	0	3	9	7	4	0	11	1	53	2	0	3	2	17	18	68	4	102	0	8	4	5	6	1	0	23
New.ReferenceOTU1149	62	113	70	51	209	53	48	92	73	153	35	14	30	16	3	47	122	13	46	133	87	49	75	64	6	86	62	58	1	78	164	118	174	9	123	76	26	76	60	33	114	67	13	60	126	25	56	44	30
New.ReferenceOTU1186	52	125	61	39	151	11	23	96	125	112	19	3	20	0	6	46	78	19	63	121	59	41	50	27	2	71	42	58	5	67	60	113	95	14	59	48	22	106	71	48	46	36	0	42	55	0	1	0	2
1013234	84	175	66	34	331	88	30	93	99	303	43	19	42	7	3	50	148	6	53	153	78	34	73	50	1	85	54	57	0	122	142	137	255	14	119	99	19	59	80	14	81	126	20	66	183	44	88	135	91
New.ReferenceOTU1845	0	0	1	0	11	0	0	0	0	0	2	0	1	0	0	1	0	0	0	0	3	1	0	0	0	2	0	4	0	0	5	1	2	1	0	3	0	0	0	0	0	1	0	0	6	0	0	0	0
New.CleanUp.ReferenceOTU9106	5	9	0	1	10	0	1	4	2	2	3	0	0	0	3	0	0	0	0	9	2	6	0	0	0	2	3	7	0	2	2	6	6	0	1	0	34	10	39	0	1	0	0	2	2	0	0	0	0
938672	1	0	1	0	0	0	0	4	0	2	0	3	1	0	0	0	0	1	2	0	5	0	1	0	0	0	3	5	0	1	0	0	0	0	0	3	0	0	3	0	2	0	17	0	2	55	52	21	103
New.ReferenceOTU1160	24	38	84	43	63	9	29	115	36	54	41	29	6	3	3	32	63	20	8	16	42	10	24	10	2	77	38	34	0	51	53	77	35	10	38	55	4	24	19	15	288	31	0	7	31	1	12	6	5
43544	80	27	42	0	263	52	5	31	37	188	7	2	1	0	20	27	74	0	13	15	23	2	163	8	22	36	59	55	15	39	186	82	93	0	42	13	31	29	77	35	11	47	84	27	38	18	157	42	72
New.ReferenceOTU1140	0	0	0	0	3	1	0	1	2	5	0	0	0	0	0	2	1	0	0	0	0	0	2	0	0	0	1	0	0	0	1	1	0	0	0	2	0	2	0	0	0	4	0	0	0	0	0	0	0
New.CleanUp.ReferenceOTU10220	107	179	171	93	222	60	68	158	230	157	33	13	15	13	15	97	99	14	135	71	112	70	120	70	21	157	179	118	7	145	118	197	154	13	199	110	70	180	92	82	156	49	0	56	134	0	0	1	0
22466	0	3	5	7	3	0	1	3	4	10	0	0	0	0	0	0	6	0	1	2	12	11	2	3	0	1	1	0	0	3	1	1	3	1	2	0	2	5	5	7	8	1	52	5	3	224	341	268	473
New.ReferenceOTU1936	0	0	0	0	0	0	0	0	1	0	0	0	0	0	0	0	0	0	0	0	1	0	0	0	0	0	0	0	0	2	0	0	0	0	0	0	0	1	0	0	0	0	15	0	0	36	55	64	66
New.CleanUp.ReferenceOTU16311	4	1	4	0	6	0	0	2	2	0	0	0	0	0	0	0	3	0	0	0	0	0	1	0	0	2	0	0	0	6	2	2	1	0	5	0	0	1	3	0	4	0	0	1	3	0	4	7	1
New.ReferenceOTU2115	0	0	0	0	4	0	0	0	0	0	0	0	0	0	0	0	0	0	2	0	0	0	0	0	0	0	0	8	0	2	0	18	0	0	1	0	0	0	4	0	0	0	9	0	4	0	2	0	1
993934	0	0	2	0	0	0	0	0	0	0	4	0	0	0	0	5	0	0	2	0	2	0	0	3	0	2	0	0	0	8	0	0	7	5	3	9	0	0	0	0	0	0	1	0	1	0	0	0	0
929493	0	1	0	0	42	0	0	0	9	11	0	0	4	0	4	0	24	0	10	27	0	1	0	11	4	0	3	0	0	49	6	32	10	0	15	0	1	22	0	0	0	11	0	4	14	1	13	25	0
288265	8	9	0	0	1	0	0	0	15	0	0	0	0	0	1	0	0	0	2	0	0	0	0	0	1	0	0	0	0	31	0	0	0	0	0	0	0	2	0	0	252	0	0	0	0	0	0	0	0
222930	5	0	0	0	24	0	0	7	15	40	0	0	0	1	0	7	1	0	13	5	2	0	6	0	1	4	6	39	0	19	12	18	15	0	32	9	3	7	18	1	0	2	24	5	12	6	24	24	19
New.ReferenceOTU58	0	7	0	0	2	0	0	0	11	3	0	0	0	0	2	0	21	0	0	0	0	1	13	0	2	0	4	0	0	2	0	0	0	0	1	0	0	0	8	0	0	4	0	9	14	3	1	2	2
519836	59	0	0	0	0	3	1	0	0	9	1	0	2	0	0	0	6	2	0	0	1	0	0	1	0	0	0	0	0	1	0	0	5	0	6	2	0	0	0	0	0	0	0	0	2	0	0	0	0
1061134	4	2	0	0	4	2	3	1	2	9	1	0	2	0	0	3	2	0	3	8	2	2	10	0	0	1	4	1	0	0	0	5	0	0	0	7	0	1	0	0	4	0	0	0	4	2	2	16	2
301251	46	110	50	6	129	94	29	51	118	89	4	10	15	0	0	46	59	4	42	118	58	32	100	21	1	86	71	31	3	75	22	29	28	15	31	193	2	105	12	11	178	101	7	51	164	41	51	120	28
987581	74	16	22	0	81	48	0	14	28	98	0	0	0	0	3	26	61	0	6	4	3	0	22	2	1	13	19	10	1	53	6	15	41	0	34	13	9	10	23	1	156	3	129	21	54	8	10	19	27
New.ReferenceOTU297	35	0	0	0	2	0	1	4	0	0	0	8	2	0	0	0	2	0	1	0	1	2	0	0	0	5	0	0	0	0	0	0	5	0	15	7	0	0	0	0	0	0	0	0	2	0	0	0	0
196800	10	30	10	9	79	1	12	5	15	184	4	10	2	0	34	19	21	2	33	15	26	8	40	9	3	18	9	30	5	38	122	37	87	0	18	33	12	10	66	5	0	37	12	4	40	66	37	55	18
591785	250	5	4	0	8	23	0	31	4	4	8	2	14	3	0	0	4	0	0	2	34	2	5	17	2	135	0	2	0	38	5	0	29	0	40	111	0	12	0	1	2	0	0	2	67	8	0	49	9
New.CleanUp.ReferenceOTU2316	3	0	0	0	2	0	0	0	0	0	0	0	0	0	0	0	0	0	2	0	0	0	0	0	0	0	0	0	0	2	0	0	0	0	1	0	3	4	0	0	0	0	1	0	0	2	7	0	1
676082	28	69	42	14	123	74	41	1	85	85	3	4	0	0	27	26	188	3	95	29	35	59	190	8	11	0	51	87	0	110	74	72	37	0	137	6	22	105	110	0	9	9	15	38	150	25	45	7	169
New.ReferenceOTU1206	0	2	1	0	1	8	3	0	3	20	0	0	0	0	0	0	2	0	0	0	2	2	18	0	0	0	3	0	0	4	5	8	0	0	17	0	0	5	3	0	1	0	0	7	0	0	0	0	0
New.ReferenceOTU216	3	0	0	2	3	0	0	1	0	0	0	0	1	0	3	0	0	0	0	2	1	0	2	1	0	0	0	1	0	4	0	0	3	0	2	1	1	0	0	0	2	1	0	1	0	3	1	0	0
New.CleanUp.ReferenceOTU6858	2	1	0	2	0	0	0	0	0	0	0	0	0	0	0	0	0	0	0	2	0	0	0	0	0	0	3	0	0	0	0	0	0	0	4	0	0	0	0	2	0	0	0	0	0	6	0	0	0
New.ReferenceOTU1261	0	3	0	0	1	0	0	0	1	1	0	0	0	0	0	0	6	0	0	0	0	0	0	0	0	0	1	0	0	8	1	0	1	0	4	0	0	1	0	0	1	1	0	0	5	0	4	0	3
New.ReferenceOTU1034	3	2	0	1	1	0	0	0	1	2	1	0	0	1	0	0	4	0	0	0	0	1	0	2	0	1	1	0	0	0	0	1	0	0	3	0	0	0	0	2	0	3	981	0	0	676	540	192	432
New.ReferenceOTU2498	2	0	2	1	2	0	2	1	0	0	0	0	1	0	0	1	2	3	0	2	2	0	3	0	0	0	0	1	0	0	0	0	3	0	4	0	0	4	0	2	1	4	3	0	0	0	4	1	1
New.CleanUp.ReferenceOTU6293	477	213	206	638	326	146	140	145	84	408	56	86	158	39	46	305	413	49	70	638	122	186	410	153	47	151	167	99	43	92	240	152	659	114	397	78	84	177	174	150	187	783	0	330	251	0	11	0	1
New.ReferenceOTU455	0	0	0	0	0	0	0	0	0	0	2	0	0	0	1	0	0	0	0	0	0	0	0	0	0	0	0	0	0	0	0	0	0	0	0	0	0	0	0	0	0	0	2	0	0	7	14	3	5
New.ReferenceOTU1588	5	2	5	12	5	1	3	1	0	9	0	0	2	0	0	0	7	0	0	8	1	1	0	0	1	0	3	0	0	0	2	0	7	3	0	2	3	0	3	2	5	2	0	4	3	0	0	0	0
New.ReferenceOTU2081	0	0	0	0	0	0	0	0	0	0	0	0	0	0	0	0	0	0	0	0	0	0	0	0	0	0	0	0	0	0	0	0	0	0	0	0	0	0	0	0	0	0	0	0	0	9	1	10	11
New.CleanUp.ReferenceOTU15288	0	6	1	0	5	3	0	0	2	5	0	0	0	0	0	1	1	0	0	0	0	0	0	0	0	0	1	1	0	5	0	12	0	0	2	0	0	10	4	0	32	0	0	0	3	0	0	0	0
New.ReferenceOTU1962	19	9	7	0	16	0	2	0	5	7	0	1	0	0	0	5	9	0	4	2	3	0	2	0	3	0	5	11	0	4	2	9	8	0	17	0	2	3	14	0	4	0	3	1	10	10	16	0	20
New.ReferenceOTU889	0	0	0	0	0	0	0	0	0	0	0	0	0	0	0	0	1	0	0	0	0	0	0	0	0	0	0	0	0	0	0	0	0	0	0	0	0	0	0	0	0	0	3	0	0	3	5	1	6
New.CleanUp.ReferenceOTU22112	2	4	0	2	7	0	0	0	3	0	0	0	0	0	0	0	5	0	0	2	0	0	0	0	1	0	0	2	0	0	3	0	0	0	1	0	0	3	0	0	7	0	0	3	1	0	0	0	0
28970	46	247	23	27	212	110	14	18	82	170	1	6	25	0	47	20	109	6	92	98	51	59	205	31	18	39	17	49	2	79	157	222	46	0	149	26	64	129	73	5	901	107	161	203	83	98	115	90	143
New.ReferenceOTU1881	0	4	0	0	0	1	0	0	2	0	0	0	0	0	0	2	1	0	4	0	2	0	0	2	0	0	0	0	0	0	1	1	0	0	4	0	3	0	0	0	14	3	0	3	0	0	0	0	0
28413	0	4	0	0	0	0	0	0	2	0	0	0	0	0	1	0	7	2	1	0	0	2	1	0	0	0	0	0	0	0	0	3	0	0	3	0	0	0	0	0	6	0	1	2	0	0	0	0	2
1068116	0	12	0	1	6	0	0	0	14	0	0	0	0	0	3	0	0	0	3	3	0	3	0	0	0	0	0	0	0	5	0	43	0	0	6	0	2	16	3	0	0	0	5	0	0	0	2	0	6
46566	15	11	0	0	19	0	0	0	5	0	0	0	0	0	2	5	0	0	4	0	0	0	0	0	0	0	0	1	0	5	0	16	0	0	0	0	6	0	5	0	0	0	2	0	0	0	14	0	7
New.CleanUp.ReferenceOTU8796	9	223	103	9	363	59	0	166	101	25	0	1	0	0	0	48	452	1	13	19	32	2	189	1	1	78	153	90	1	63	129	163	81	0	63	3	42	133	54	4	254	9	2	99	92	0	0	1	0
296325	0	5	6	1	3	1	0	1	7	1	0	0	0	0	0	2	11	0	0	1	0	0	4	0	0	0	3	3	0	2	5	0	0	0	0	0	1	0	1	0	5	0	219	0	1	109	314	92	250
New.CleanUp.ReferenceOTU11931	0	3	0	0	8	1	0	1	0	0	0	0	0	0	0	0	5	0	0	0	6	0	4	0	0	1	0	0	0	3	0	0	0	0	0	0	1	0	1	0	6	0	0	0	1	0	0	1	0
343443	99	343	225	78	1125	250	13	263	319	112	2	3	6	1	44	207	849	0	36	44	140	40	584	28	32	303	168	419	2	504	471	179	282	5	352	270	81	118	497	137	1717	160	67	278	484	128	337	1007	763
New.CleanUp.ReferenceOTU2592	0	4	9	3	13	5	0	0	4	1	0	0	0	0	1	5	13	0	0	0	2	3	16	2	1	1	6	9	0	7	3	2	2	0	7	3	0	1	7	2	23	2	0	0	12	0	0	0	0
New.ReferenceOTU1821	3	4	7	0	24	0	0	0	2	0	0	0	0	0	0	0	2	0	0	1	2	0	0	0	0	1	0	2	0	0	13	1	3	0	4	3	0	1	0	0	8	4	0	1	6	0	0	0	0
New.ReferenceOTU2392	0	0	0	0	0	0	0	0	0	0	0	0	0	0	0	0	0	0	0	0	0	0	0	0	0	0	0	0	0	0	0	0	0	0	0	0	0	0	2	0	0	0	22	0	0	27	3	2	55
New.CleanUp.ReferenceOTU1641	8	8	42	83	66	0	0	118	1	0	2	0	0	0	3	17	8	1	0	3	16	5	0	3	1	314	26	302	2	14	0	95	4	8	33	0	20	14	350	14	0	0	0	0	115	1	0	0	6
49682	0	0	0	1	0	0	0	2	0	0	0	0	0	0	0	0	0	0	0	0	0	0	0	0	0	1	0	6	0	2	0	2	0	1	1	0	0	0	4	5	0	0	26	0	0	83	58	0	82
527437	3	0	0	0	11	1	0	7	0	5	0	0	0	1	0	1	0	0	0	0	14	2	1	1	0	9	0	0	0	1	0	3	1	0	10	0	0	0	0	5	10	0	0	0	7	0	1	0	0
New.ReferenceOTU623	25	8	9	0	0	7	2	0	3	12	0	4	0	0	0	1	23	4	3	1	10	4	5	12	2	2	10	1	2	11	15	0	4	1	7	18	6	4	0	14	2	0	14	7	1	4	11	0	2
527408	14	2	4	16	2	19	0	2	77	32	0	47	119	2	15	0	3	1	2	3	40	135	23	12	37	0	7	9	4	12	1	10	41	2	2	9	33	5	0	24	2	24	6	2	5	3	10	0	5
New.ReferenceOTU1061	108	27	18	11	16	19	0	7	20	0	0	1	0	0	69	81	12	0	16	25	0	3	38	0	18	9	32	20	0	76	1	29	42	0	103	50	25	9	42	5	2	1	29	12	9	57	17	6	7
New.ReferenceOTU1279	0	0	0	0	0	0	0	0	0	2	0	0	0	0	0	0	48	0	0	0	0	0	0	0	0	0	0	6	0	7	0	1	0	0	0	0	0	0	0	0	0	0	0	1	0	0	0	0	3
New.ReferenceOTU326	0	9	0	0	56	0	0	0	0	0	0	0	0	0	0	0	0	0	0	0	0	0	0	0	0	0	0	0	0	0	0	0	0	0	0	0	31	0	3	0	0	0	0	0	0	1	0	0	0
New.ReferenceOTU879	14	10	7	0	52	0	3	0	3	1	1	0	1	0	5	1	10	0	10	0	0	0	3	1	2	0	0	6	0	0	0	5	0	0	0	0	12	0	2	0	0	0	17	4	0	13	9	1	1
20534	185	41	27	1	91	12	5	17	83	0	0	0	6	3	8	8	2	1	1	0	2	0	22	9	4	49	4	60	2	33	1	13	67	1	57	89	18	6	6	4	0	3	0	7	49	3	7	5	29
New.ReferenceOTU2213	37	23	1	0	22	0	0	0	1	10	0	1	2	4	0	0	6	0	1	0	0	0	0	0	0	0	0	74	0	1	2	0	4	0	3	14	6	0	11	0	30	2	0	1	15	7	0	4	0
1033345	18	7	7	0	7	0	3	0	0	8	0	0	0	0	2	7	22	0	10	0	4	0	4	0	0	0	0	5	0	13	1	1	8	0	7	8	0	1	2	0	23	0	3	5	23	8	15	6	5
514521	0	0	0	0	0	0	0	0	1	0	0	0	0	0	0	0	0	0	1	0	0	0	0	0	0	0	0	0	0	0	0	0	4	0	0	0	0	0	0	0	1	0	9	0	4	6	9	30	6
531596	67	23	39	1	17	14	1	0	29	26	2	0	0	0	0	4	7	1	67	0	70	4	53	3	0	2	64	3	14	134	3	3	190	0	107	35	17	23	2	2	140	5	1	20	41	9	0	4	0
515074	7	0	0	0	8	12	2	9	1	5	0	0	0	0	0	0	0	0	0	2	3	0	6	0	0	5	3	28	0	2	10	9	2	0	2	2	1	1	2	0	0	0	5	3	13	0	3	0	3
New.ReferenceOTU1161	2	2	0	0	4	3	0	0	1	3	0	0	0	0	0	8	0	0	2	0	1	3	1	2	0	0	1	8	1	6	1	17	2	0	6	2	0	1	3	2	0	0	2	0	30	1	19	0	4
New.ReferenceOTU1047	7	5	0	0	2	0	0	0	1	2	0	0	0	0	0	3	0	0	7	0	0	0	1	0	0	0	4	4	2	0	0	2	0	0	2	0	0	4	0	0	0	0	0	12	6	0	0	0	0
531477	3	0	0	0	0	0	0	3	1	0	0	0	0	0	0	0	0	0	0	0	0	0	1	0	0	1	0	0	0	0	0	0	2	0	3	3	0	0	0	0	0	0	9	0	1	0	3	0	10
524213	37	17	2	0	29	20	0	20	13	32	0	0	0	0	0	6	0	0	0	0	12	0	29	5	0	52	13	29	2	6	2	16	17	0	19	33	4	3	2	0	3	0	0	5	82	0	0	0	0
New.CleanUp.ReferenceOTU18377	0	0	0	0	2	0	0	2	0	9	0	0	0	0	0	1	3	0	0	0	1	0	3	0	0	2	3	1	0	0	0	0	5	0	0	0	0	0	1	0	0	0	0	0	2	10	10	0	11
52212	0	0	0	0	7	0	0	0	0	10	0	0	0	0	0	1	2	0	0	0	7	0	0	0	0	6	1	6	1	5	3	0	4	0	2	0	0	0	0	0	0	0	0	0	11	0	0	0	0
New.ReferenceOTU2440	14	30	6	0	27	21	1	9	61	35	0	0	0	2	6	2	17	0	17	1	9	2	12	2	12	29	6	7	0	20	15	21	20	0	30	5	7	37	3	6	5	14	2	6	6	2	1	18	6
New.ReferenceOTU1609	16	9	0	1	12	0	0	7	2	2	0	0	0	4	1	0	43	0	1	2	14	4	0	0	0	9	0	6	0	16	10	7	5	0	2	0	1	13	2	6	0	3	15	16	24	11	26	17	3
New.ReferenceOTU2672	3	11	0	0	0	0	4	0	22	0	0	0	0	0	6	0	0	0	4	0	0	0	0	0	4	0	0	0	0	16	0	49	0	0	0	0	24	8	0	0	0	0	0	0	0	0	0	0	0
875643	10	72	9	6	77	19	1	1	34	78	0	3	0	0	3	7	86	3	11	11	17	0	23	1	3	2	2	66	0	34	72	92	0	0	10	8	22	85	41	5	0	26	32	29	30	9	80	21	128
300853	105	152	141	37	194	142	1	93	238	72	0	9	10	10	89	120	108	0	39	90	115	13	114	46	63	360	114	275	5	198	11	153	132	1	198	196	29	70	75	25	174	112	111	108	59	121	133	116	75
4369901	24	0	6	0	0	20	21	11	7	6	11	4	14	1	0	0	15	1	3	0	15	8	8	14	0	34	2	2	0	6	0	1	23	2	6	45	0	2	0	6	22	37	0	4	12	0	0	0	0
New.ReferenceOTU1168	0	5	0	0	9	0	0	1	0	0	0	0	0	0	1	0	0	0	0	0	0	0	0	0	0	11	0	2	0	0	0	8	0	0	0	0	8	0	1	0	0	0	0	0	0	2	0	0	1
New.ReferenceOTU1136	33	41	16	6	79	3	0	2	3	6	0	5	2	0	5	4	50	0	2	4	12	7	10	2	2	7	29	14	4	11	40	27	17	0	25	25	26	2	125	9	1	0	11	5	46	81	51	53	18
New.ReferenceOTU1272	0	12	0	0	3	0	0	0	3	0	0	0	0	0	0	0	0	0	0	0	0	0	0	0	0	0	0	0	0	0	0	0	0	0	0	0	0	2	1	0	0	0	0	0	6	0	4	30	0
New.ReferenceOTU2416	143	32	0	0	36	0	0	4	3	1	0	0	0	0	0	4	1	0	0	0	0	0	2	1	0	20	0	30	2	21	0	59	0	0	0	4	1	9	17	1	0	0	3	0	67	9	2	54	2
New.ReferenceOTU617	0	4	0	0	7	3	0	13	0	2	0	1	0	0	1	0	11	4	0	0	4	1	16	0	3	7	0	0	0	8	0	0	1	9	2	4	0	0	0	0	0	0	8	0	2	0	2	5	0
294146	0	3	4	0	21	3	2	0	0	2	0	1	0	0	4	12	2	6	1	5	2	16	2	14	0	0	5	0	1	0	0	0	0	0	0	0	2	2	1	0	0	0	0	3	0	0	2	0	1
New.CleanUp.ReferenceOTU20789	1	0	0	0	0	1	1	2	0	0	0	0	0	0	5	2	3	0	1	0	2	0	0	4	0	0	4	0	1	0	2	0	1	0	3	4	0	0	0	0	0	0	1	0	0	5	0	1	0
New.ReferenceOTU831	0	0	1	0	0	0	0	0	0	0	0	0	0	0	0	2	0	0	0	0	0	0	0	0	0	0	1	0	0	0	0	0	0	0	0	0	0	0	0	4	0	0	6	0	0	0	0	0	2
New.ReferenceOTU838	0	9	0	0	0	0	5	8	14	0	0	0	5	0	0	3	2	0	0	0	2	0	0	0	0	2	1	0	0	2	0	0	0	0	3	2	0	0	0	1	0	7	0	0	2	1	1	9	2
New.ReferenceOTU1788	0	0	0	0	0	0	0	1	3	0	0	0	0	0	0	3	5	0	0	0	0	0	2	0	0	7	0	0	0	4	0	7	0	0	0	4	0	2	0	0	0	0	0	2	0	0	0	2	0
298592	0	0	0	0	0	0	4	0	0	0	0	0	0	2	3	0	0	1	0	0	0	0	0	0	0	0	1	0	22	1	6	0	0	0	0	0	0	1	0	0	7	0	0	0	1	0	0	0	0
1654477	1	0	0	0	0	0	0	0	0	0	0	3	0	9	0	0	0	8	0	0	0	0	2	2	0	0	2	0	10	2	0	0	0	0	0	0	0	0	3	4	5	0	24	0	0	5	0	0	3
518933	1	5	0	3	0	2	5	2	4	0	1	0	0	4	0	0	2	0	3	0	0	6	0	12	0	0	0	0	0	1	1	0	6	3	6	4	0	4	0	0	0	1	0	0	0	0	0	0	0
312916	0	6	0	0	4	0	1	0	1	2	0	1	0	0	0	5	2	0	3	0	0	1	1	7	0	0	0	0	0	0	5	0	0	0	0	1	2	2	4	1	0	0	0	0	0	6	27	28	30
533298	4	16	6	2	21	9	2	2	29	11	3	7	0	0	5	64	44	0	3	3	2	11	12	38	6	0	2	2	4	6	30	6	0	0	3	22	11	15	27	15	1	2	0	4	0	0	0	0	0
New.ReferenceOTU165	0	8	0	0	5	0	0	0	5	1	0	0	0	0	5	8	1	0	5	0	0	3	1	3	0	0	3	0	0	1	0	0	0	0	0	0	0	1	4	2	0	0	0	0	0	0	1	0	0
527058	25	36	49	0	70	33	14	9	19	22	18	9	10	3	4	68	22	2	23	20	17	3	14	211	12	3	19	9	3	12	88	7	17	14	41	101	5	4	11	2	177	0	0	5	11	35	23	67	50
New.ReferenceOTU2622	0	0	5	0	1	0	0	0	1	1	0	0	0	0	0	3	0	0	2	0	0	2	1	3	0	0	0	0	0	0	6	0	0	0	0	1	0	0	2	0	0	0	0	1	0	0	1	0	2
516159	67	3	0	0	3	8	5	4	0	4	0	116	3	0	0	0	3	4	5	1	0	0	6	61	0	0	1	0	0	0	3	0	29	2	6	5	0	0	0	0	219	0	0	1	0	4	0	0	0
524117	1	0	0	0	0	0	0	0	0	0	0	6	2	0	0	0	0	0	0	0	0	0	0	0	0	0	0	0	0	0	0	0	0	0	0	0	0	0	0	0	3	0	0	0	0	14	0	0	0
588216	0	0	0	0	0	0	0	8	0	0	1	0	0	1	0	0	3	0	0	0	1	0	0	2	0	0	0	1	0	0	1	0	0	0	0	0	0	0	2	0	0	0	0	0	1	0	0	0	0
1111294	22	2	0	0	0	1	0	46	0	0	4	0	0	4	1	6	0	2	0	0	1	0	2	3	2	0	0	0	6	5	6	5	0	5	0	0	1	0	2	0	4	0	3	5	0	1	1	2	0
173654	0	0	0	0	0	0	0	0	0	0	0	0	0	0	0	0	0	0	0	0	0	0	0	0	0	0	0	0	0	0	2	0	0	0	0	0	0	0	0	0	0	0	55	0	0	20	18	71	40
797229	268	93	26	10	10	64	29	3536	66	29	96	57	22	229	134	62	42	119	76	0	73	34	93	103	18	44	76	74	236	116	230	185	34	251	17	18	9	54	89	81	73	2	64	55	30	21	16	49	10
New.ReferenceOTU655	6	0	0	0	1	5	0	75	0	0	0	0	1	5	2	1	2	4	4	0	0	0	2	4	1	1	0	1	10	1	9	1	1	6	0	0	0	3	4	5	0	1	0	0	0	0	0	0	0
782953	0	0	0	0	0	0	0	10	0	0	0	0	0	2	0	0	0	0	0	0	0	0	0	4	0	0	3	0	3	0	1	0	0	0	0	0	0	2	1	0	0	0	0	0	0	0	0	0	0
25562	3	17	0	0	14	0	0	11	10	2	0	0	0	0	0	0	59	0	0	0	0	0	0	0	1	36	0	7	0	16	0	13	9	0	8	0	3	0	6	0	0	0	3	2	3	0	5	2	51
New.ReferenceOTU1786	1	3	0	1	1	1	8	0	0	0	11	0	8	16	2	14	2	4	14	0	12	0	1	17	3	0	4	0	0	2	0	0	1	1	1	1	2	0	4	5	0	4	0	0	0	0	0	0	2
New.ReferenceOTU2434	0	0	8	0	0	2	0	2	0	3	0	0	0	0	2	0	7	0	0	0	0	0	32	7	0	7	4	0	3	3	4	11	0	0	0	1	0	3	1	2	14	0	0	0	2	0	0	4	2
529652	4	1	1	0	1	2	2	2	0	0	0	0	1	13	0	0	1	1	2	0	2	1	3	17	1	1	1	5	4	0	6	1	3	0	3	5	0	2	3	0	11	3	0	0	7	0	0	4	0
194360	1	0	0	0	0	1	0	0	0	0	0	0	0	0	0	0	0	0	1	0	0	0	0	0	0	0	0	0	0	0	0	0	0	0	0	0	0	0	1	0	0	0	1	0	0	5	0	4	11
636296	5	0	4	2	2	2	2	1	0	4	0	0	0	4	1	7	10	7	7	0	17	0	9	24	0	7	2	12	3	10	5	6	7	0	3	7	0	2	7	2	9	4	0	0	12	1	1	3	0
333380	0	0	0	0	2	0	0	0	0	0	0	0	0	0	0	0	0	0	0	0	0	0	0	0	0	0	1	0	0	0	0	0	1	0	0	0	1	0	0	0	0	0	3	0	0	0	3	1	2
New.ReferenceOTU381	0	0	3	0	0	2	0	0	1	0	6	0	0	0	2	0	0	0	0	0	0	0	18	0	0	0	9	0	2	0	5	0	0	0	0	0	0	0	0	5	9	0	11	0	0	0	0	0	3
355745	0	4	0	0	0	1	0	1	0	1	2	0	0	0	2	0	3	4	0	0	2	0	1	6	1	0	0	0	10	1	4	0	0	0	1	0	1	0	1	7	2	0	7	0	2	0	0	0	2
1832447	0	1	0	3	1	5	5	2	2	4	1	0	0	1	14	12	8	0	11	7	0	0	0	5	6	1	0	0	3	0	0	2	1	6	1	11	1	3	1	18	0	0	0	2	5	1	0	0	1
1134576	1	0	0	0	0	4	3	0	0	2	0	0	0	0	5	4	20	4	6	0	0	0	0	3	0	0	1	0	0	4	3	0	0	0	0	1	6	2	5	5	0	0	5	0	0	1	1	0	0
99294	0	4	0	0	3	0	0	0	3	0	0	0	0	0	1	9	2	0	3	0	8	0	2	3	2	1	0	0	1	0	0	2	0	1	0	0	2	0	3	2	0	7	4	2	0	1	0	0	0
New.CleanUp.ReferenceOTU7632	0	0	1	0	5	5	0	0	0	0	0	0	2	2	0	0	0	0	0	0	0	3	3	0	0	0	0	0	0	0	4	0	0	0	0	5	0	0	0	0	0	0	2	8	0	4	1	0	1
297140	98	44	2	21	49	6	28	49	18	33	7	50	15	17	4	17	58	6	64	93	23	7	8	6	2	49	4	16	10	12	3	25	5	32	49	10	6	8	0	7	0	18	3	45	3	22	8	7	13
1038455	2	7	1	0	2	4	3	6	4	3	3	2	0	2	0	6	10	0	0	3	2	1	6	0	0	5	0	13	0	19	3	2	5	0	6	3	0	1	1	6	0	7	0	4	2	3	9	3	13
New.ReferenceOTU1072	0	2	3	0	0	0	0	0	3	0	0	0	0	0	5	1	0	0	1	0	0	0	0	0	0	6	1	2	0	1	0	0	0	0	0	0	0	0	3	0	0	0	0	3	0	5	4	0	0
New.ReferenceOTU301	0	30	1	12	51	2	10	26	42	10	11	6	0	3	22	8	70	3	17	4	17	8	18	20	7	28	2	3	2	35	1	31	4	3	9	6	11	12	21	2	0	0	18	23	8	14	6	5	35
New.ReferenceOTU1744	0	17	4	5	5	1	2	0	27	6	1	6	3	0	14	24	13	7	7	9	4	1	1	0	9	14	1	4	2	8	0	0	1	0	7	4	9	0	8	11	0	3	0	4	6	3	0	0	0
New.ReferenceOTU694	1	2	2	4	3	11	9	3	1	5	0	0	0	3	0	4	24	2	14	4	3	5	1	5	0	4	0	3	0	6	1	6	9	0	3	8	1	6	2	0	0	2	2	2	2	5	2	16	6
291158	4	0	0	0	0	21	7	0	0	3	18	8	15	0	0	0	0	0	0	0	0	0	2	20	0	0	0	0	0	0	10	0	21	4	5	4	0	0	0	0	28	22	2	0	0	0	0	6	0
4355504	37	75	51	79	48	111	117	52	96	30	112	32	47	182	35	169	107	26	181	2	71	25	81	78	115	151	165	60	151	94	71	112	83	53	34	127	74	66	40	75	3	38	87	49	183	54	48	79	87
New.ReferenceOTU433	0	0	0	713	0	0	0	0	0	0	0	0	0	0	879	0	2	0	0	0	0	0	0	0	1234	0	0	147	65	0	0	0	0	0	0	0	923	0	929	202	0	0	0	0	0	187	0	0	0
514045	58	0	0	0	0	0	0	0	0	0	0	4	20	0	0	0	2	0	0	0	0	0	0	46	0	0	0	0	0	0	3	0	1	63	0	0	0	0	0	0	0	0	0	0	0	0	0	0	0
309470	30	6	5	0	2	3	0	1	0	6	0	0	0	0	0	3	2	0	1	0	6	0	2	1	0	4	0	2	0	0	1	3	2	0	8	0	3	0	6	0	0	0	0	3	0	1	21	6	2
New.ReferenceOTU2294	0	0	7	3	0	0	0	0	3	6	0	0	0	0	0	0	0	3	2	0	0	7	0	0	0	9	2	11	5	3	0	0	1	0	1	7	10	0	0	18	0	0	0	2	4	6	0	4	0
New.ReferenceOTU1624	0	20	0	31	3	0	3	72	28	23	29	50	21	10	18	23	20	0	43	46	8	30	0	0	15	80	8	2	43	5	0	0	41	0	8	19	11	0	25	50	0	0	9	74	44	18	16	28	46
New.ReferenceOTU2570	2	3	0	0	5	22	0	2	6	0	3	0	0	0	0	1	1	0	1	0	2	0	0	9	2	1	2	2	0	4	6	1	2	0	0	4	0	6	0	0	4	2	4	1	1	0	4	2	0
924224	9	52	18	6	25	43	3	29	28	15	4	5	13	6	11	56	53	0	17	6	20	8	39	34	15	36	16	17	5	20	24	61	11	3	47	16	17	64	26	8	0	14	56	23	41	27	45	26	66
742519	3	0	2	0	0	0	64	0	0	0	2	0	0	0	0	0	0	7	4	0	0	19	0	0	0	0	0	0	0	0	0	0	0	0	1	0	0	0	0	0	0	0	1	4	0	0	0	0	1
274299	0	0	0	0	0	0	0	0	0	0	0	0	0	0	0	0	0	0	0	0	0	0	0	0	0	0	0	0	0	0	0	0	0	0	0	2	0	2	0	0	0	0	12	0	0	9	50	11	0
259533	1	9	8	4	0	5	100	1	6	3	0	5	0	0	1	4	9	12	12	6	4	15	1	4	5	4	4	1	1	0	0	2	2	0	6	5	4	10	0	7	0	6	12	7	2	9	23	9	1
580934	9	76	71	50	16	73	596	11	67	34	10	80	17	5	27	66	77	63	128	60	42	174	33	3	43	13	78	1	21	41	2	14	27	3	52	46	48	58	9	98	0	78	10	44	29	1	4	2	1
292458	0	1	0	1	0	0	1	6	0	0	0	1	2	0	0	2	11	0	5	0	0	0	0	0	0	4	0	0	0	2	0	2	0	0	0	0	0	1	0	0	0	0	0	0	1	24	36	55	5
New.ReferenceOTU121	1	15	2	0	21	2	0	4	4	10	3	0	0	0	0	1	42	0	4	0	1	0	2	5	1	12	4	1	1	0	0	18	6	0	2	9	13	1	12	2	0	19	3	9	0	11	5	24	11
New.ReferenceOTU516	0	10	0	0	3	8	0	10	20	5	4	0	0	2	1	0	7	0	2	1	2	0	0	0	2	17	0	0	0	2	0	0	0	0	8	2	1	2	0	0	3	2	0	1	4	0	0	3	0
299900	0	14	1	1	1	3	5	7	17	6	5	2	6	2	0	0	15	0	3	8	6	0	2	0	0	14	0	0	0	3	0	6	2	0	0	4	7	1	0	0	3	5	36	1	5	24	17	9	1
289070	0	4	0	0	2	2	5	1	5	3	0	0	0	0	0	1	1	0	14	3	1	1	0	2	2	0	2	0	2	0	0	0	0	0	0	0	0	0	2	2	0	1	115	2	1	88	63	66	24
296406	28	92	38	99	59	91	89	39	197	64	19	230	114	44	20	62	48	51	92	250	44	108	84	25	18	100	44	26	64	41	25	97	26	3	81	67	20	146	24	160	0	129	3	122	50	3	0	4	0
302670	13	121	11	44	34	3	24	20	64	17	12	29	30	5	12	49	5	12	156	40	13	34	15	4	9	16	31	9	15	10	3	9	3	15	49	21	2	28	3	23	0	15	0	45	25	0	1	2	3
661758	0	0	0	0	0	0	0	2	0	0	0	0	0	0	0	0	0	0	0	0	0	0	0	0	0	2	0	0	0	0	0	0	0	0	0	0	0	0	0	0	0	0	4	0	0	8	18	9	14
New.ReferenceOTU1224	0	34	15	5	32	0	28	57	9	7	39	5	26	4	22	13	98	1	26	10	8	3	3	0	24	64	3	3	0	24	3	10	4	19	5	5	6	10	4	1	0	22	0	7	30	3	2	0	0
New.ReferenceOTU2079	6	12	0	5	2	0	17	0	4	1	0	10	0	0	1	6	1	0	28	10	5	3	0	0	10	16	0	1	3	1	0	0	1	0	11	2	0	0	12	16	0	0	4	0	3	10	4	0	6
New.ReferenceOTU1347	23	96	49	43	73	2	275	40	70	88	96	50	241	113	42	82	137	86	63	149	38	58	16	6	31	88	39	14	17	31	3	117	28	0	47	66	26	46	43	69	0	37	32	58	13	39	55	36	30
New.ReferenceOTU2575	56	1	1	164	9	9	56	9	26	30	38	114	19	62	34	25	5	33	61	132	11	71	29	1	19	18	5	5	23	24	3	14	7	49	21	43	27	73	8	58	0	66	98	33	2	19	8	9	12
856253	66	55	46	48	45	226	104	31	113	94	104	80	61	130	2	59	12	79	43	43	100	52	48	14	6	246	31	6	18	166	46	84	38	96	15	68	4	79	4	31	3	182	29	158	13	21	35	69	7
New.ReferenceOTU1943	43	40	28	33	5	98	145	36	18	3	401	86	86	73	3	45	25	40	17	20	135	113	3	21	4	69	14	14	19	15	43	71	10	43	11	20	19	20	24	32	89	54	80	9	12	16	12	12	20
New.ReferenceOTU1884	15	2	4	10	3	16	20	10	12	7	19	13	16	8	15	16	0	6	66	26	3	0	9	5	9	4	14	0	0	6	4	12	1	26	6	5	1	17	4	8	0	6	9	18	8	5	1	0	6
New.ReferenceOTU710	11	0	0	0	0	4	21	0	0	0	90	16	328	31	0	0	0	298	0	0	0	7	0	16	0	0	0	0	4	0	0	0	2	168	0	0	0	0	0	17	0	0	7	0	3	0	0	0	0
New.ReferenceOTU846	3	22	6	0	22	0	0	5	0	4	0	5	2	0	6	79	4	1	13	2	12	5	15	9	0	13	14	9	4	25	9	0	11	0	5	4	3	3	1	4	0	7	4	5	21	2	26	1	0
New.ReferenceOTU2078	5	22	29	18	28	20	3	2	60	13	11	49	32	7	9	94	9	10	185	7	98	37	52	55	28	39	75	4	9	14	16	2	11	9	3	33	51	15	15	27	0	36	24	16	15	11	20	2	0
354599	2	1	4	2	4	9	0	0	0	7	1	2	0	0	2	8	4	4	12	2	16	2	3	2	0	0	3	0	3	0	1	0	0	4	0	1	0	0	6	0	0	6	2	0	2	1	3	0	0
68837	11	33	4	2	75	38	22	29	14	27	13	3	5	31	8	27	76	4	26	0	31	0	36	15	8	38	46	39	3	19	34	52	17	2	2	27	21	35	30	9	93	34	70	25	45	9	18	36	27
638485	27	13	10	30	2	3	48	4	15	9	0	69	3	1	188	72	19	0	213	7	2	14	26	5	37	4	94	0	8	21	2	13	21	0	108	20	28	8	1	66	0	9	7	25	10	13	40	4	0
288106	1	10	0	6	0	0	0	0	25	12	0	0	0	0	21	37	0	0	33	2	0	0	0	0	4	31	0	0	0	0	0	0	1	0	0	5	8	0	3	0	0	1	0	20	0	0	7	5	0
New.ReferenceOTU1522	0	4	0	1	0	0	0	1	5	9	0	0	0	0	5	23	0	0	9	0	0	0	0	0	0	6	0	0	0	0	0	0	0	0	1	2	2	0	1	0	0	0	0	10	0	0	7	3	0
New.ReferenceOTU2093	25	11	7	4	3	13	11	2	2	0	0	6	3	0	5	20	9	0	6	5	0	29	1	2	2	9	6	12	0	7	2	10	1	0	4	6	13	4	1	6	0	9	0	5	3	3	2	9	5
1129038	5	6	0	9	4	35	0	0	6	0	0	0	0	2	0	3	0	0	0	0	1	0	1	0	0	5	5	0	0	4	2	8	5	3	3	0	2	3	5	0	0	8	0	17	6	8	12	0	0
1056816	0	0	1	0	0	3	0	0	8	0	8	6	8	1	0	0	0	9	0	0	1	0	0	0	0	5	1	2	0	0	0	1	0	1	0	0	0	0	0	1	2	0	0	0	0	1	1	3	1
4406819	0	0	2	6	0	6	1	5	3	0	4	4	0	1	1	5	5	0	0	7	3	5	0	0	1	2	2	4	2	4	0	6	6	1	3	0	2	4	4	4	1	2	0	1	3	7	8	1	1
179499	0	0	2	0	0	2	0	0	0	2	0	0	0	0	0	0	0	4	3	0	0	0	0	4	0	5	0	0	0	1	1	0	2	3	0	1	0	2	2	0	0	1	0	0	0	0	1	1	0
710432	0	0	0	3	0	0	0	1	2	2	8	5	8	1	3	2	7	6	4	0	4	12	0	14	7	6	0	0	0	3	10	12	9	0	0	1	0	11	0	0	1	1	4	0	0	28	1	16	13
New.ReferenceOTU564	1	2	5	7	4	4	5	1	8	4	8	4	1	13	4	6	18	2	1	12	7	17	23	6	5	1	10	9	19	0	54	6	20	8	15	10	5	21	8	5	8	43	16	1	16	20	3	31	14
263895	1	0	5	2	1	0	3	10	0	6	3	0	0	1	4	12	2	0	1	0	5	0	0	0	3	8	10	3	49	6	1	5	1	2	4	3	0	0	4	24	0	1	6	2	7	15	0	3	22
296726	0	0	0	0	0	0	0	8	0	4	1	0	0	5	0	0	0	1	0	0	0	0	0	0	0	3	3	6	14	0	0	1	0	1	2	0	0	0	4	4	0	0	0	2	3	0	0	0	1
812596	13	5	0	0	1	0	0	0	0	0	0	0	0	0	0	0	5	0	0	0	0	0	0	0	0	0	1	0	0	0	0	1	0	0	0	0	1	0	0	0	1	0	0	1	1	0	0	3	0
72926	20	9	1	0	47	0	0	0	0	0	1	0	1	0	0	3	6	0	0	0	0	0	3	11	0	1	0	10	0	1	1	11	0	0	1	3	0	0	1	0	1	0	0	0	3	0	0	3	0
517344	59	25	2	0	37	3	0	3	0	7	1	1	0	0	0	1	5	0	0	0	0	0	0	2	0	2	0	21	0	0	3	13	5	0	6	10	0	1	0	0	0	0	0	2	5	0	0	0	0
521200	0	0	0	0	0	0	0	0	0	0	0	0	0	0	0	0	0	0	0	0	0	0	0	0	0	0	0	0	0	0	0	0	0	0	0	0	0	0	0	0	0	0	0	0	0	9	3	26	17
New.ReferenceOTU2401	14	10	2	0	13	9	0	4	1	1	0	2	5	2	0	3	4	5	1	0	5	2	2	5	4	1	5	11	0	1	17	14	5	0	14	8	6	7	0	0	0	4	0	6	12	6	10	18	7
New.ReferenceOTU887	4	6	5	4	3	1	2	9	7	0	3	0	0	8	5	13	11	0	20	1	4	3	3	0	1	18	3	17	4	10	0	33	10	0	14	4	5	15	3	8	0	0	0	10	17	2	7	25	15
916143	0	3	3	1	0	4	15	1	0	2	9	8	1	10	1	7	0	4	0	3	3	3	2	4	0	2	0	5	2	2	6	11	0	5	6	2	1	7	2	3	2	5	1	1	4	1	0	5	5
605577	0	5	1	2	2	4	0	0	0	3	2	0	0	4	0	8	2	7	10	0	0	8	5	7	3	2	2	2	5	1	2	8	5	0	4	3	2	4	4	4	4	4	2	0	2	4	2	14	9
618906	0	2	0	12	0	0	2	0	0	0	0	3	0	2	1	6	0	0	0	0	2	5	4	0	0	0	0	2	0	0	0	1	4	0	0	0	0	0	5	0	0	0	0	0	1	5	0	14	3
553228	4	0	0	2	2	0	0	0	0	0	1	0	0	7	0	0	0	12	1	1	0	2	5	4	0	2	0	0	0	0	1	0	0	0	3	0	0	1	0	0	0	2	0	0	0	1	0	0	0
552621	0	0	0	4	0	0	5	0	0	0	0	1	0	0	0	0	4	0	0	0	5	4	0	5	0	1	0	0	0	0	1	1	3	0	1	0	0	2	1	5	0	4	0	1	0	0	0	0	1
542934	8	0	4	0	0	0	5	0	0	0	0	0	4	8	0	0	0	5	0	0	0	0	0	5	0	0	0	0	0	0	0	0	3	1	0	6	0	2	1	2	0	0	0	0	0	0	0	1	3
New.ReferenceOTU1010	0	0	0	0	0	4	2	0	0	0	6	1	1	2	3	12	6	2	2	0	4	3	2	5	0	0	14	1	2	1	1	0	4	6	0	3	2	0	5	0	0	11	0	3	2	2	0	0	4
New.ReferenceOTU1625	0	0	0	0	0	2	0	0	0	0	7	0	0	0	0	15	2	0	0	0	1	0	0	12	0	0	1	0	4	0	0	0	0	0	0	4	0	0	0	0	0	0	0	0	0	0	0	0	0
New.ReferenceOTU2298	0	0	2	0	1	0	0	0	1	0	2	3	6	3	0	15	14	0	2	0	0	0	0	17	0	0	3	0	0	0	0	0	0	0	4	9	0	1	0	2	0	0	0	0	0	0	1	1	0
277916	0	0	2	0	0	3	5	0	0	0	5	0	1	0	6	0	9	0	1	0	0	0	1	1	0	0	0	0	0	1	1	0	4	2	0	2	0	0	1	0	4	0	0	0	0	0	0	0	0
New.ReferenceOTU178	1	0	6	1	3	7	0	0	0	4	0	0	0	4	2	0	8	1	0	0	1	0	1	0	8	7	7	2	1	0	0	2	0	0	0	3	0	0	0	7	0	0	1	1	1	0	0	3	2
1121634	1	10	16	13	6	36	8	0	2	5	6	0	5	6	4	53	0	0	13	16	3	1	1	15	0	7	31	16	5	4	1	17	16	8	16	39	20	11	13	14	0	3	12	1	7	5	5	0	4
510498	0	0	1	0	0	5	1	0	0	0	0	0	0	0	3	7	0	0	0	1	0	1	0	0	0	0	0	0	5	0	0	0	0	0	3	4	0	2	0	0	0	0	8	0	0	14	14	0	3
New.ReferenceOTU2225	0	0	0	0	0	0	0	1	0	0	0	0	0	0	7	159	0	0	0	0	0	0	0	0	1	0	0	0	0	0	0	0	0	0	0	0	0	0	1	0	0	0	0	0	0	0	49	0	0
516613	0	1	2	3	4	5	0	0	0	2	1	6	3	4	2	0	0	0	0	3	1	0	2	7	2	0	8	0	3	6	6	3	3	1	5	14	2	4	2	6	0	12	0	0	4	0	0	0	0
New.ReferenceOTU1312	3	0	2	0	9	7	3	0	5	8	6	2	3	8	5	12	15	2	3	4	11	5	8	7	1	2	2	0	5	0	0	7	5	5	0	9	0	1	0	4	0	5	0	2	9	0	1	7	1
185593	7	1	1	0	0	3	2	0	1	0	4	0	0	5	0	5	4	0	1	0	0	0	1	5	1	3	1	3	0	0	0	0	0	0	4	4	1	3	0	1	0	0	0	0	8	0	5	2	0
New.ReferenceOTU2324	0	0	0	0	0	0	6	4	0	0	10	17	0	0	15	0	0	4	0	0	0	0	0	5	1	5	0	0	0	0	0	1	0	16	0	0	19	0	0	0	0	0	5	0	0	0	0	0	0
New.ReferenceOTU966	0	0	4	0	0	0	8	0	0	0	3	0	0	0	7	14	0	0	0	0	1	0	0	0	7	0	4	0	10	0	0	0	0	1	0	0	0	0	13	24	0	0	2	0	0	0	4	0	0
New.ReferenceOTU1243	0	0	4	0	0	0	6	1	0	0	3	0	0	0	12	0	0	0	0	0	0	0	1	14	1	6	1	4	5	0	0	0	3	0	0	0	10	0	3	5	0	0	2	0	0	0	2	1	0
New.ReferenceOTU1187	0	0	0	0	2	4	4	4	1	0	2	1	0	0	6	38	0	1	0	0	8	0	0	4	7	0	1	1	9	0	4	0	0	2	1	1	0	0	0	8	0	0	6	1	0	0	3	0	1
New.ReferenceOTU1385	1	4	3	0	0	17	1	0	8	0	3	14	5	11	11	2	0	0	1	0	1	0	2	12	8	1	4	0	21	2	0	0	7	0	0	0	4	0	2	9	0	0	13	0	0	0	2	1	1
368490	2	18	3	25	8	7	18	7	15	10	10	4	7	20	6	17	28	20	13	6	12	12	1	14	13	14	12	3	8	8	20	18	13	0	5	23	12	20	7	6	5	15	10	17	7	81	11	43	3
New.ReferenceOTU2031	0	26	51	6	5	15	5	11	19	0	2	3	6	5	0	0	6	35	7	22	5	1	3	16	5	21	10	25	0	0	1	28	2	13	1	18	2	10	4	9	7	7	0	0	3	7	6	1	5
328458	0	4	0	10	12	5	10	3	9	2	30	13	10	13	4	4	5	9	24	6	0	8	1	3	1	37	0	8	10	4	0	9	21	2	2	32	1	2	0	5	0	9	0	3	1	13	0	42	0
593803	0	1	3	0	3	1	1	1	2	1	0	2	0	0	0	0	0	3	0	0	0	0	0	2	1	1	0	13	0	0	0	2	0	2	0	3	0	3	3	0	0	0	0	0	0	1	6	2	4
302880	0	1	2	0	0	0	0	0	3	0	0	0	0	0	0	0	0	6	0	0	0	0	0	1	0	6	2	5	0	0	0	2	0	0	0	2	0	1	1	0	0	0	0	0	0	7	7	2	16
255359	0	9	16	0	1	7	7	0	7	0	3	5	0	7	1	0	0	7	1	3	1	0	0	5	2	13	0	12	0	1	2	7	0	1	2	3	0	9	1	13	0	0	0	1	0	0	0	0	2
328283	0	2	14	1	2	4	6	0	3	0	1	0	0	3	0	0	0	4	0	2	0	1	0	4	1	4	2	8	3	0	1	9	0	1	0	6	2	3	1	1	0	0	0	0	3	7	3	0	4
532232	14	517	1317	108	97	368	331	118	605	51	105	121	91	150	179	20	77	696	147	403	99	100	189	603	103	608	212	1317	21	169	110	872	80	240	49	599	68	328	106	244	141	111	0	50	97	2	0	0	0
533277	7	286	850	101	50	227	164	67	323	32	95	82	51	105	107	16	54	457	94	246	44	50	141	299	77	388	102	930	15	103	79	608	30	151	29	402	38	232	70	112	87	65	0	30	48	0	1	0	0
349024	3	73	151	20	18	33	21	18	60	7	27	19	7	15	17	2	17	88	15	48	8	10	15	79	19	57	31	169	4	16	8	86	8	29	10	78	4	34	6	8	25	15	16	5	8	1429	1342	271	1518
316587	0	0	4	0	0	0	1	0	0	0	0	0	0	0	0	0	0	0	0	0	1	0	0	6	1	0	2	1	0	0	0	1	0	0	0	0	0	3	0	2	1	0	0	0	0	16	5	4	11
24271	0	0	4	6	0	0	0	0	0	0	0	0	1	0	0	0	0	5	0	0	0	0	0	0	0	0	0	2	0	0	0	0	0	0	0	0	0	0	7	0	6	0	32	0	0	0	4	0	0
1107385	0	0	0	0	0	0	0	0	0	0	0	0	0	0	0	0	0	0	0	0	0	0	0	0	0	0	0	0	0	0	0	0	0	0	0	0	0	0	0	0	2	0	30	0	0	1	0	2	5
338757	1	0	11	3	4	1	3	0	0	0	8	0	12	3	1	0	2	0	0	0	7	2	0	2	0	2	3	3	1	0	0	0	15	2	0	1	4	1	0	0	1	4	25	0	0	4	0	1	0
536754	2	0	0	0	0	0	0	0	0	0	0	0	0	0	0	0	0	0	0	0	0	0	0	0	0	0	0	0	0	0	0	0	0	2	0	0	0	2	1	0	0	0	9	0	0	25	16	12	12
588197	27	13	63	41	29	2	6	1	16	0	13	1	12	16	3	0	0	12	0	32	36	7	0	9	1	11	29	82	0	3	8	2	23	37	3	41	6	25	3	9	23	73	1	0	3	0	0	3	1
553352	2	2	0	29	17	0	8	0	3	0	16	0	40	21	3	0	0	0	0	10	19	11	0	5	0	1	1	6	0	0	0	2	4	15	0	6	3	4	0	0	0	45	0	0	0	1	0	0	0
581474	8	4	9	230	95	5	21	8	26	0	101	6	279	94	23	2	1	9	0	132	104	87	2	23	6	22	9	20	1	2	0	8	27	69	0	13	2	27	0	20	1	326	0	1	0	1	0	1	1
549756	0	0	1	14	2	0	1	0	6	0	6	1	21	2	0	0	0	1	2	0	4	6	0	0	1	4	0	0	0	0	0	0	1	2	0	2	0	0	0	0	0	19	3	0	0	0	0	0	0
354905	0	0	0	0	0	0	0	0	0	0	0	0	0	0	0	0	0	0	0	1	0	0	0	0	0	0	0	2	0	0	0	0	0	0	0	0	0	0	0	0	0	3	26	0	0	24	1	24	8
593376	0	0	20	1	2	0	0	0	0	0	0	0	0	0	2	0	0	0	1	0	0	0	0	0	1	1	14	0	0	0	0	0	0	0	0	0	0	0	0	2	1	5	0	0	3	0	0	0	1
302975	3	0	4	2	0	0	0	0	0	0	0	0	1	0	1	0	0	0	0	0	0	0	0	0	0	0	2	1	0	0	0	0	0	0	0	0	0	0	0	1	0	0	0	0	0	21	4	2	36
703741	30	3	58	21	47	0	3	1	3	0	0	2	1	0	8	1	1	4	0	15	26	5	0	14	3	0	18	71	6	0	5	2	0	1	0	17	1	43	3	16	1	7	0	0	0	0	0	0	3
1084045	0	0	0	0	0	0	0	0	8	0	5	0	0	0	0	60	0	0	0	0	1	0	0	0	0	0	0	0	2	0	0	0	0	0	2	1	0	0	1	0	0	0	0	0	0	0	0	2	0
526583	5	0	0	0	1	3	3	5	3	0	8	0	3	23	3	3	5	9	5	1	0	0	5	0	1	7	0	6	3	2	5	1	0	0	6	6	0	3	1	3	4	4	0	1	5	1	0	4	4
322840	0	0	0	0	0	6	1	0	1	0	1	2	0	0	0	0	0	0	0	1	0	0	0	0	0	2	0	0	1	0	2	0	0	0	3	0	0	0	6	1	0	6	5	0	0	2	0	0	4
555945	13	47	32	67	20	43	25	39	36	29	46	31	12	30	28	37	93	45	6	6	13	31	16	31	15	83	35	19	86	19	147	43	28	17	28	40	34	99	43	34	17	44	74	36	50	116	13	60	30
564581	3	18	8	20	2	40	15	3	9	5	10	7	7	6	7	9	5	15	22	5	6	7	13	11	13	20	5	6	26	10	14	25	6	11	7	38	7	20	8	8	2	6	3	16	15	2	0	6	4
712677	13	49	15	121	26	170	43	79	41	53	80	43	36	84	37	57	142	126	68	29	52	50	67	72	30	118	62	18	76	42	76	65	55	62	37	102	28	76	82	61	37	36	54	72	66	136	20	107	39
628226	4	2	4	2	6	5	2	0	5	0	6	3	0	0	4	6	0	3	7	1	2	3	1	0	0	7	2	1	10	3	1	4	0	11	2	5	0	1	0	12	4	4	15	0	4	19	3	41	8
337392	1	8	9	0	5	7	0	6	2	5	4	7	0	0	5	4	6	0	8	1	2	2	5	0	2	1	4	2	11	4	15	2	9	0	7	0	1	5	13	16	1	14	9	0	0	3	9	0	7
New.ReferenceOTU585	4	0	1	5	3	3	0	2	0	5	0	0	0	0	0	0	15	0	2	0	0	0	1	6	2	1	8	3	2	4	2	9	1	0	10	9	0	6	2	3	2	0	0	9	4	6	5	2	5
New.CleanUp.ReferenceOTU22209	0	0	0	0	3	0	0	0	0	0	0	0	0	0	0	0	1	0	2	0	2	0	0	0	0	5	0	1	1	2	0	5	0	0	7	1	0	2	4	0	0	0	3	6	2	1	1	3	7
1084643	0	4	0	3	2	0	1	0	0	0	1	0	3	0	2	0	0	2	0	0	2	3	0	0	3	0	1	0	5	4	1	0	2	0	0	1	4	1	2	5	0	0	4	0	0	8	0	0	0
4380006	5	7	5	7	11	6	2	0	6	6	0	8	0	1	3	5	21	0	2	0	1	3	17	5	7	3	8	12	0	15	11	12	4	0	9	3	4	19	9	1	4	10	6	4	8	7	5	4	0
New.ReferenceOTU1762	2	1	3	1	3	0	1	2	1	1	0	1	0	0	0	0	5	0	0	0	0	0	2	0	0	3	3	1	0	0	2	1	1	0	0	0	0	1	2	0	0	4	5	4	1	1	0	0	3
302433	6	6	3	7	7	0	1	9	1	5	9	0	9	25	5	0	6	7	8	5	5	5	5	2	2	0	1	6	3	2	11	4	6	5	8	8	5	0	3	3	0	0	0	2	5	6	3	6	0
578588	3	7	0	0	0	4	3	0	3	2	1	0	9	0	0	0	0	4	6	0	4	2	2	4	0	0	0	0	1	3	0	0	5	4	0	2	0	0	0	4	1	4	0	3	2	0	1	0	0
New.ReferenceOTU993	0	0	4	0	0	1	1	0	3	0	0	1	1	2	0	6	0	0	0	0	2	2	3	0	1	0	0	1	1	0	0	5	1	0	0	0	3	1	0	0	1	1	0	0	4	0	0	1	0
300855	0	0	0	0	0	0	0	0	0	0	0	1	0	0	0	0	0	0	0	0	0	0	0	0	0	1	0	0	0	0	0	0	0	0	0	0	1	0	0	0	0	0	81	0	0	80	80	65	60
683621	11	74	118	84	43	110	76	95	93	50	62	64	16	62	74	74	89	77	82	74	60	59	99	95	53	71	113	78	56	175	155	112	62	45	142	84	103	158	42	56	60	196	9	197	138	8	2	2	17
1522739	0	0	0	0	0	0	0	0	3	0	0	0	3	0	0	0	0	0	0	0	3	0	0	0	0	0	0	2	2	0	1	0	0	0	1	0	0	0	0	0	0	1	0	0	1	2	9	0	7
New.ReferenceOTU552	7	0	5	0	0	2	1	0	0	0	0	0	5	0	0	1	2	0	0	0	0	0	3	2	3	0	4	2	1	7	6	0	1	3	2	1	7	6	0	1	0	4	0	0	0	0	0	0	0
New.ReferenceOTU2678	2	2	3	0	0	0	0	3	6	3	6	0	1	4	0	1	0	2	3	4	3	2	2	1	6	0	4	3	3	7	0	1	0	0	5	4	2	4	1	2	3	4	0	11	1	0	0	0	2
524842	0	4	18	6	3	22	7	2	8	8	7	9	2	4	0	4	3	9	5	3	2	7	13	3	4	5	17	3	11	12	14	3	5	5	2	4	10	12	4	18	12	7	6	11	3	8	2	1	15
330532	0	1	6	2	0	2	0	0	0	1	3	4	0	0	2	3	0	1	0	0	0	2	0	0	0	2	4	0	0	5	0	1	0	0	3	0	0	2	2	1	0	2	0	2	4	0	0	0	0
589450	0	0	6	8	1	2	0	3	0	0	4	0	0	10	0	5	0	11	3	0	0	1	0	0	3	6	9	7	6	3	0	5	0	0	2	6	3	4	7	15	3	0	2	2	10	5	0	1	9
337511	3	2	1	0	6	2	0	0	0	0	0	0	0	0	0	9	8	0	0	0	3	0	9	0	1	3	0	1	0	0	6	1	6	0	1	1	1	3	1	0	3	0	0	0	0	0	0	0	0
36792	0	4	0	7	6	1	1	3	6	4	0	3	0	3	1	5	2	2	4	4	0	1	2	1	1	0	5	2	3	1	3	5	2	2	3	1	0	16	0	3	0	13	0	0	2	12	5	6	3
New.ReferenceOTU1490	6	6	15	0	0	0	0	4	11	8	2	12	0	0	8	3	4	0	0	3	1	15	0	8	5	5	8	6	5	5	0	2	3	0	5	3	10	6	0	14	2	1	1	5	8	3	5	13	0
33133	0	0	3	9	0	1	2	0	0	3	4	0	0	0	0	0	0	2	3	1	7	2	0	0	3	3	7	0	5	0	3	0	6	3	0	1	0	0	0	0	2	1	0	1	0	1	4	0	0
544243	0	0	0	4	0	0	0	2	0	0	2	0	0	4	0	0	0	5	3	0	0	6	0	0	0	1	0	3	6	1	0	0	0	0	0	0	0	0	8	0	0	0	0	0	0	0	1	0	0
New.ReferenceOTU2118	0	1	3	0	0	0	4	2	1	0	0	0	0	2	0	0	0	1	0	3	0	4	0	0	1	0	1	0	4	0	0	0	0	0	2	0	7	0	4	3	0	0	1	0	1	4	0	0	0
347636	6	13	7	5	0	0	1	5	7	1	2	7	2	17	0	11	3	5	3	6	7	5	10	0	5	10	6	2	20	0	4	3	9	8	2	0	5	2	6	6	3	0	9	6	6	64	7	1	9
331417	1	1	5	7	0	0	0	1	2	1	0	1	0	0	3	6	2	5	2	0	5	3	0	0	1	1	4	2	3	0	2	0	1	0	1	3	8	4	6	5	0	0	11	0	6	26	16	8	11
New.ReferenceOTU1882	15	24	20	5	27	27	3	6	18	30	1	6	3	10	9	9	17	2	19	19	25	19	27	9	14	22	22	12	1	15	29	23	7	8	20	7	13	28	17	16	4	11	7	17	16	25	13	4	4
287635	0	0	1	0	0	0	0	0	0	0	2	0	0	4	3	0	0	0	0	0	0	0	0	0	0	0	0	0	0	0	0	0	0	0	0	0	0	0	0	1	0	0	9	0	0	19	17	14	0
318366	13	1	8	12	7	1	32	5	0	0	69	0	35	155	45	62	1	167	59	3	23	22	17	0	21	19	21	23	61	8	1	6	1	26	8	48	9	0	9	12	3	0	3	8	11	0	0	0	0
291202	0	0	0	0	3	12	3	0	1	0	0	0	3	3	1	1	0	0	2	0	4	2	0	9	0	0	2	2	0	1	5	0	0	0	9	1	0	0	0	0	1	0	0	0	5	2	1	4	0
40798	2	2	10	4	2	1	11	10	6	0	7	6	15	20	2	7	1	17	3	3	3	16	3	1	0	13	7	13	0	2	8	0	2	9	2	4	0	3	0	3	1	0	0	0	17	0	0	7	0
738351	6	8	24	12	13	1	4	9	17	6	5	2	9	2	2	19	9	5	10	0	8	1	8	2	10	19	20	38	10	29	12	40	0	0	3	12	0	4	17	11	12	3	65	5	19	28	12	34	37
269611	4	0	2	0	4	0	0	0	0	0	0	0	0	0	0	0	0	0	0	0	0	0	0	0	0	3	0	0	6	0	3	0	0	0	0	0	0	0	0	1	7	0	16	0	1	2	0	5	3
308157	0	1	0	0	0	0	4	0	0	0	0	0	0	0	0	0	1	0	0	0	0	0	0	0	0	0	0	1	2	1	0	1	0	0	3	0	0	0	1	3	6	0	2	1	1	0	0	0	0
697548	7	0	0	0	0	0	8	0	3	2	0	1	6	0	8	0	6	0	1	1	0	0	1	0	3	0	0	0	0	2	1	3	2	0	0	0	0	0	0	0	0	5	0	12	0	2	0	0	0
336890	6	14	0	11	4	13	9	0	5	3	9	8	52	15	18	12	21	11	17	5	2	10	15	20	8	0	1	0	34	7	5	2	9	0	11	3	5	2	0	6	0	17	3	2	6	5	2	5	9
523140	0	2	0	1	12	0	7	1	5	14	13	0	3	11	1	1	0	1	5	2	1	15	0	3	1	0	1	1	0	2	1	3	13	0	3	17	1	8	7	0	4	0	0	8	5	2	2	0	0
970805	0	5	0	0	13	0	4	5	2	0	0	0	0	0	0	0	1	0	2	0	0	2	0	0	0	3	4	1	0	4	0	4	0	0	0	0	0	0	0	1	0	0	0	0	27	0	7	69	0
309285	4	1	0	0	6	5	8	10	14	1	1	9	0	3	7	7	4	0	1	3	12	0	2	18	2	14	1	5	0	1	0	4	4	8	73	5	1	4	3	3	0	0	5	3	4	1	1	5	2
196392	6	8	0	0	2	14	1	9	3	0	9	0	6	6	6	20	10	0	8	2	8	0	4	19	5	11	4	1	3	2	12	6	9	2	8	4	5	2	3	6	0	0	0	2	0	1	1	0	0
4314125	0	1	2	4	1	1	3	1	5	2	1	0	0	0	0	3	0	1	4	0	3	1	2	10	3	2	3	4	2	4	1	5	0	0	2	2	1	7	0	6	0	0	0	2	4	0	0	0	0
578147	0	6	0	0	0	4	2	1	4	5	16	2	7	10	15	25	4	0	1	0	9	5	4	1	6	6	6	6	2	10	1	4	2	1	1	14	7	11	5	9	4	16	2	3	14	0	19	2	3
844006	4	2	12	5	7	7	4	12	9	13	9	4	0	21	1	5	4	2	2	5	11	4	32	5	3	12	17	2	9	6	13	4	8	3	3	14	13	20	2	5	6	21	2	1	28	9	19	23	8
301386	2	40	19	12	30	10	9	40	85	19	2	0	0	27	37	30	45	7	42	2	28	19	54	2	35	44	28	32	18	60	61	40	20	0	25	39	15	34	21	30	0	15	17	21	55	19	21	70	75
New.ReferenceOTU2131	4	3	0	0	3	6	0	0	0	1	0	6	0	7	4	0	0	1	2	2	0	1	4	1	2	0	0	7	0	3	4	0	1	0	8	1	7	1	0	0	1	3	0	1	2	4	6	6	0
525698	24	3	0	0	1	5	6	8	0	0	0	0	1	0	0	0	0	2	1	2	5	1	0	7	0	5	0	0	0	0	0	0	6	9	2	4	0	0	0	2	0	4	0	1	4	0	0	0	0
86170	5	0	0	0	0	2	1	9	0	0	0	0	0	0	0	0	0	0	1	0	0	0	2	0	0	0	0	0	0	0	7	0	0	0	7	0	0	0	0	3	2	1	0	0	2	0	0	0	0
New.ReferenceOTU2577	1	0	0	0	1	4	2	0	0	0	0	0	0	0	0	0	5	0	0	2	1	0	1	1	0	1	2	0	3	1	3	1	2	0	2	0	0	4	0	2	0	6	11	2	2	7	4	24	15
51306	4	5	0	0	1	11	14	5	9	6	3	3	0	3	7	1	7	0	5	0	5	0	10	8	1	2	1	4	6	3	22	6	12	0	8	1	8	6	1	6	18	11	0	20	22	0	0	0	0
29495	12	3	1	2	0	0	0	0	5	1	0	1	0	0	0	0	8	0	4	0	0	2	2	0	0	2	0	1	0	3	4	0	2	2	1	3	0	0	0	0	0	1	0	0	8	2	0	5	0
515953	13	14	20	4	19	12	1	3	15	1	1	2	7	6	6	9	18	9	6	1	6	4	1	3	2	17	17	15	5	12	0	27	9	5	15	42	5	9	8	9	0	14	0	6	32	0	0	6	0
New.ReferenceOTU1954	0	0	2	0	4	0	0	1	0	0	0	0	0	0	1	2	0	0	0	0	0	0	1	0	0	0	3	4	0	1	0	6	0	0	0	1	2	10	2	1	0	0	7	3	2	8	7	31	5
367213	18	0	1	0	3	6	3	4	0	0	0	0	4	0	2	0	2	0	5	0	6	1	3	10	0	1	0	0	2	3	9	0	16	11	1	6	0	3	0	5	0	2	0	0	3	0	0	1	0
584951	13	12	22	22	9	8	38	17	4	6	10	0	3	9	5	5	19	3	12	7	16	4	18	24	8	2	4	2	4	6	8	3	11	11	9	6	3	6	0	7	0	2	1	11	14	10	6	17	1
199182	0	2	0	8	1	3	5	4	0	1	0	5	0	2	0	0	2	0	0	0	2	0	3	0	0	9	4	11	7	0	0	2	3	4	0	7	0	3	1	3	8	0	0	0	1	8	1	10	2
509788	9	0	7	0	0	7	0	0	2	4	4	0	1	2	2	0	0	2	0	1	12	4	18	36	0	0	0	0	4	1	24	0	8	0	5	4	0	3	0	0	0	7	1	2	4	0	0	9	0
299833	0	4	0	6	0	0	7	0	0	0	2	4	0	2	0	0	0	0	3	0	0	1	0	0	0	2	1	6	0	3	0	0	0	0	0	0	0	3	0	0	1	0	0	3	0	0	5	0	0
593824	0	1	0	0	0	0	7	0	5	0	0	0	0	2	0	3	0	1	0	0	0	0	0	0	0	0	0	1	0	0	0	0	0	3	10	9	0	3	0	0	1	0	3	4	0	0	0	3	0
344272	9	11	24	23	17	19	12	15	12	7	6	4	6	13	21	10	5	15	3	11	11	31	10	13	14	10	16	34	13	20	13	34	10	4	32	11	8	44	14	30	2	11	0	5	2	9	0	0	0
583572	1	13	22	7	1	33	15	25	2	29	29	2	6	26	7	9	12	13	16	4	16	2	28	19	19	10	15	9	5	19	19	48	11	17	46	18	12	38	0	13	2	17	8	6	18	11	25	40	31
323481	0	1	5	0	0	3	5	4	0	0	6	0	0	0	10	3	0	0	2	0	2	0	2	2	1	1	3	1	0	2	1	2	0	0	7	4	5	0	12	0	0	12	0	0	0	1	0	0	0
355373	0	9	12	6	10	10	7	13	8	13	9	1	10	2	2	14	3	15	2	3	11	4	13	1	17	2	7	14	16	9	9	16	15	13	21	10	17	6	13	18	2	3	10	3	2	13	18	20	43
566899	4	9	3	1	0	7	0	2	17	15	0	0	0	0	6	4	1	0	8	0	15	5	10	2	0	0	7	4	5	2	2	25	6	0	15	0	6	7	6	0	36	9	13	13	17	5	7	0	3
332831	10	9	13	0	5	7	0	33	3	3	0	0	0	0	0	2	15	0	1	2	8	2	1	7	0	42	1	13	0	5	1	6	4	0	3	9	0	1	0	0	0	1	0	1	7	0	0	1	0
342543	0	0	0	0	0	0	0	0	0	0	0	0	0	0	0	0	0	0	0	0	0	0	0	0	0	1	0	0	0	0	0	0	0	0	0	1	0	0	0	0	0	0	0	0	0	3	4	41	2
1501336	0	0	1	0	0	3	6	0	0	3	0	0	0	0	0	1	4	0	0	0	0	0	1	0	0	3	1	0	0	1	0	0	0	0	0	0	2	0	0	0	0	0	0	1	4	0	0	0	0
674324	0	0	3	0	2	4	1	6	1	0	0	0	0	0	0	10	3	0	4	0	0	4	1	0	0	3	2	1	0	0	0	1	0	0	4	11	5	8	0	0	0	0	0	1	12	1	1	2	1
302144	4	0	17	1	1	5	0	21	0	1	0	0	1	0	0	0	18	4	0	0	12	3	3	12	0	25	9	4	1	1	5	1	20	0	3	3	1	0	0	5	0	0	0	0	1	4	11	18	3
335480	4	0	11	0	0	1	0	0	2	2	0	0	0	0	6	15	2	0	0	0	8	2	0	15	0	1	4	1	0	0	4	0	5	2	5	0	1	1	2	0	0	0	0	0	1	0	1	0	0
1105454	0	7	0	1	3	0	2	9	1	0	0	0	0	0	5	29	0	0	28	0	1	7	18	2	1	8	0	3	8	23	0	8	2	0	1	1	10	24	3	12	0	3	0	4	32	42	20	10	58
322004	1	26	4	0	18	6	0	13	31	0	4	0	0	3	6	14	2	4	9	4	9	0	67	4	0	12	11	29	8	11	8	50	10	0	5	10	24	26	39	2	0	15	0	7	11	0	0	0	1
531238	3	2	0	4	0	1	0	0	4	0	0	0	0	0	2	0	2	0	3	4	1	0	3	0	8	0	2	0	5	2	1	5	0	0	0	0	1	3	0	13	0	0	0	2	2	6	2	2	0
339121	0	0	1	1	2	5	0	0	0	0	0	0	0	0	0	0	0	0	0	0	0	0	0	0	0	2	0	1	1	4	1	4	1	0	0	0	0	1	0	2	0	6	0	0	0	2	0	2	0
345871	0	0	0	1	0	2	2	0	0	0	1	0	0	3	0	1	0	0	0	0	0	0	0	2	0	2	0	2	0	1	0	0	15	0	0	4	0	8	0	0	0	4	0	2	1	0	0	0	0
326348	1	1	4	4	1	2	7	3	2	0	0	0	4	0	5	1	1	5	0	8	3	1	2	10	0	1	5	3	4	17	14	2	5	0	3	8	1	5	3	1	0	0	0	8	4	0	6	2	0
322729	0	5	4	3	2	2	0	6	4	0	0	1	0	5	8	0	45	0	14	0	0	0	3	0	4	2	5	4	10	0	0	9	8	0	11	0	3	0	4	3	0	13	0	9	1	0	0	0	0
New.ReferenceOTU2001	0	0	0	1	0	0	0	0	0	0	0	0	0	0	0	1	0	0	1	0	1	2	0	0	2	0	0	0	0	0	0	0	0	0	2	0	0	0	0	0	0	0	18	0	0	4	14	0	6
294246	0	0	0	0	0	0	0	0	0	0	0	0	0	0	0	0	0	0	0	0	0	0	0	0	0	0	0	0	0	0	0	0	0	0	0	0	0	0	0	0	0	0	16	0	0	2	14	4	13
304531	14	3	1	7	6	32	0	6	7	43	2	41	3	0	4	11	14	2	24	2	18	22	33	16	6	5	9	5	40	14	23	0	3	0	2	2	7	15	49	8	51	55	3	16	7	0	0	0	0
365965	92	45	71	120	47	116	62	51	86	107	100	94	33	65	33	76	134	154	41	179	169	120	70	246	67	41	139	31	32	112	140	40	106	89	102	126	89	61	50	31	56	159	169	51	78	171	98	59	111
958505	13	20	73	112	46	20	71	14	12	61	25	118	12	169	78	49	0	121	94	110	85	45	142	19	138	15	128	29	251	45	17	44	0	76	158	28	324	122	102	105	6	0	0	148	7	2	2	0	7
333325	1	3	0	0	0	5	0	0	12	0	0	0	0	0	0	3	0	0	2	0	2	0	7	0	0	0	0	0	0	1	0	0	4	0	0	0	2	6	0	0	0	0	0	0	0	0	0	3	0
279534	0	0	2	0	5	0	0	1	0	0	0	0	0	1	0	0	4	0	0	0	0	0	0	0	0	1	3	0	1	0	1	0	0	0	0	1	3	1	1	0	0	0	0	0	1	0	0	0	0
46910	2	6	5	0	18	26	0	10	3	15	0	0	0	0	0	0	13	0	8	0	11	0	22	7	1	34	5	7	6	19	19	11	23	0	17	48	0	17	0	1	0	1	1	3	4	7	6	13	4
359984	0	10	1	0	16	5	0	3	5	8	0	0	0	0	0	4	1	0	2	0	5	9	3	3	1	4	11	4	35	6	10	6	6	0	12	8	7	2	0	0	21	0	12	1	9	7	3	3	4
97263	0	0	0	0	0	0	0	0	0	0	0	0	0	0	0	0	0	0	0	0	0	0	0	0	0	0	0	0	0	0	0	0	0	0	0	0	0	0	0	0	0	0	12	0	0	8	0	4	1
2835813	0	0	0	2	0	2	3	0	0	0	3	6	2	7	0	0	1	0	1	0	2	0	0	0	0	0	0	0	3	0	1	0	0	2	3	0	2	1	1	4	4	0	6	1	0	1	3	1	0
248492	0	6	4	2	0	13	3	3	2	5	2	4	6	11	1	1	6	14	18	5	3	0	8	2	1	2	5	1	7	2	4	1	14	1	0	5	2	2	0	2	1	8	3	2	6	7	1	8	3
526413	5	2	1	0	1	0	3	1	6	2	0	0	4	9	0	0	0	7	3	0	1	3	3	0	1	0	4	2	1	0	0	2	3	0	1	5	0	2	1	0	4	1	0	4	7	3	0	18	0
New.ReferenceOTU2140	0	2	6	3	0	0	0	0	0	4	4	1	2	0	3	3	0	2	0	2	0	0	0	0	3	2	5	0	1	3	0	1	1	6	3	0	3	2	1	0	0	11	3	1	1	2	4	0	1
New.ReferenceOTU227	1	4	6	3	2	6	0	2	2	11	2	1	1	3	1	1	3	11	5	0	3	7	3	2	2	0	10	3	4	3	3	1	0	2	3	0	6	2	1	2	5	6	3	2	5	0	6	2	3
New.ReferenceOTU539	0	0	2	0	0	0	0	0	0	1	0	0	0	3	2	0	0	0	0	0	0	4	0	2	0	0	0	6	0	0	0	0	9	0	1	4	0	0	0	2	0	0	0	0	2	0	0	3	0
New.ReferenceOTU2148	0	0	4	2	1	2	0	0	0	2	0	0	0	1	0	7	7	1	1	0	0	0	5	0	0	4	3	0	2	0	11	1	3	3	0	5	0	7	2	10	5	2	12	0	0	6	5	6	3
147100	0	5	0	0	2	7	0	4	3	0	0	13	0	0	0	0	10	0	10	4	1	0	1	0	4	0	3	2	8	2	3	2	2	1	0	5	0	5	2	5	3	4	0	0	0	0	0	0	0
New.ReferenceOTU2326	0	1	0	0	1	0	1	0	0	0	11	1	4	0	0	2	0	7	0	1	5	0	0	2	2	1	0	0	1	0	0	0	0	0	9	0	2	0	0	0	0	0	0	0	0	0	0	0	0
30067	0	10	1	5	3	4	3	7	8	0	9	0	6	1	2	0	1	3	2	0	3	3	2	5	2	0	3	2	1	3	5	0	6	12	2	0	0	0	7	0	4	0	3	0	1	1	0	0	1
New.ReferenceOTU1223	0	1	0	0	0	7	7	2	0	0	1	0	0	0	3	0	0	3	4	0	10	1	5	0	5	0	3	1	8	1	0	3	0	3	1	0	7	3	9	1	0	0	0	3	2	0	0	0	2
New.ReferenceOTU1991	1	3	1	0	1	0	5	1	2	1	0	0	2	1	7	5	1	0	6	6	10	2	4	5	4	5	0	3	8	4	5	1	2	0	9	3	1	2	4	4	4	3	4	1	2	0	2	0	1
102424	0	0	45	14	0	1	14	3	0	0	3	0	6	16	10	32	0	27	0	0	9	4	20	4	17	8	40	16	17	5	1	0	0	0	24	0	9	5	16	16	0	0	0	0	1	0	0	0	0
301280	28	32	28	17	30	16	17	39	37	75	47	49	44	32	44	18	20	17	42	36	86	56	35	30	57	30	7	10	70	39	80	55	42	30	19	13	95	46	84	50	12	21	40	40	52	21	42	42	18
313452	0	0	0	1	0	0	0	0	1	3	0	0	0	0	1	1	4	0	0	0	6	0	1	0	0	0	0	0	6	0	0	1	1	1	0	0	6	2	4	0	1	1	0	0	0	2	3	3	0
290399	8	6	15	26	15	9	3	11	12	17	6	9	5	7	17	20	8	4	1	18	8	6	27	23	18	2	17	25	9	11	27	10	8	3	2	15	13	13	9	4	0	14	15	9	8	10	25	9	18
New.ReferenceOTU865	14	23	33	55	53	95	128	50	50	52	132	55	26	120	38	63	46	89	76	60	64	86	83	69	56	69	27	91	9	86	87	51	37	66	72	83	80	28	34	14	100	54	0	25	142	0	0	0	0
369109	29	0	13	32	1	0	19	4	1	22	57	23	6	77	3	2	6	1	10	10	183	41	5	18	2	2	5	13	5	0	2	5	1	32	6	5	51	4	0	2	13	1	71	17	2	13	31	93	78
New.ReferenceOTU434	2	0	2	0	3	1	0	5	13	4	0	0	0	1	0	1	3	0	0	2	3	6	0	1	1	5	8	1	0	2	0	4	0	0	1	2	4	3	1	1	2	0	0	0	3	6	6	6	4
111237	0	2	0	0	26	3	5	11	4	18	0	0	0	1	4	6	4	0	0	5	7	9	4	6	0	2	3	5	0	8	6	8	3	0	5	2	11	3	8	0	0	5	0	2	10	9	3	13	9
New.ReferenceOTU67	0	0	2	0	2	0	0	0	1	0	0	0	4	4	2	2	0	1	0	0	1	0	0	0	1	0	0	0	0	0	0	2	0	0	0	0	0	3	0	0	0	3	0	0	1	2	6	0	0
168068	0	0	0	0	0	0	4	0	0	0	0	0	7	2	0	2	3	0	0	0	2	0	1	0	0	0	0	0	0	1	0	0	0	0	2	0	0	0	0	0	0	0	0	0	5	0	0	0	0
340923	0	0	0	0	0	0	0	0	2	0	0	0	0	0	1	0	5	0	0	0	2	0	0	0	0	3	0	0	0	0	0	0	0	0	2	0	0	0	0	0	0	1	4	1	0	53	4	8	26
562408	27	63	8	15	37	81	1	44	30	37	2	0	12	2	39	21	49	20	12	9	29	8	24	27	13	76	4	15	1	32	16	25	42	8	36	49	27	41	55	20	0	68	21	29	41	35	18	8	10
4315471	0	0	0	0	0	0	0	0	0	0	1	0	0	0	3	0	0	0	0	0	28	0	0	0	0	0	0	2	82	0	0	0	0	0	0	0	117	0	23	111	0	0	12	0	0	7	0	0	13
356454	1	0	19	1	5	56	16	7	0	6	19	55	16	35	20	10	1	31	25	3	30	0	18	1	25	5	30	6	31	20	2	4	0	23	11	0	2	4	21	68	38	12	17	10	2	9	13	0	26
New.ReferenceOTU1868	0	0	0	0	0	0	0	0	0	0	0	0	0	0	0	0	0	0	0	0	0	0	0	0	0	0	0	0	0	0	0	0	0	0	0	0	0	0	5	0	0	0	52	0	0	0	0	0	0
300644	0	6	0	0	2	0	0	0	1	1	0	0	0	0	0	0	0	1	0	0	6	0	0	0	4	0	0	2	1	1	2	0	3	1	1	6	0	0	0	1	0	4	0	0	1	0	0	1	0
192079	5	5	0	0	11	0	0	0	0	0	0	0	0	1	0	0	0	0	0	0	0	0	0	2	0	0	0	0	5	0	0	3	0	0	0	0	0	0	0	0	6	0	0	0	2	0	0	0	0
346720	22	12	3	0	4	1	0	2	6	4	0	2	34	3	4	0	1	7	2	16	6	5	0	7	8	3	0	1	3	4	10	0	6	1	0	1	3	2	2	1	28	4	0	4	2	3	0	1	0
571111	0	0	0	0	0	0	59	0	0	0	6	12	0	0	23	8	0	0	0	0	11	0	0	0	17	0	0	5	0	0	0	0	0	1	24	0	5	0	10	0	0	0	0	0	0	0	0	0	0
105964	0	0	0	0	0	0	0	0	0	0	0	0	0	0	2	0	0	0	0	0	1	0	0	0	0	0	0	0	27	0	0	0	0	0	0	0	22	0	0	16	0	0	0	0	0	0	0	0	0
342612	0	0	0	0	0	0	11	0	0	0	26	0	0	1	60	1	0	0	0	0	52	0	0	0	27	0	0	9	0	0	0	0	0	0	26	0	20	0	0	0	0	0	1	0	0	0	0	0	0
181768	0	0	0	0	0	0	0	0	0	0	0	0	0	0	0	0	0	0	0	0	0	0	0	0	0	0	0	0	2	0	0	0	0	0	0	0	0	0	0	0	0	0	10	0	0	0	0	0	0
44827	0	0	0	0	0	0	0	0	0	0	0	0	0	0	0	0	0	0	0	1	0	0	0	0	0	0	0	0	0	0	0	0	0	0	0	0	0	0	0	0	0	0	1	0	0	7	4	3	3
New.ReferenceOTU1523	0	0	0	0	0	0	0	0	0	0	0	0	0	0	0	0	0	0	0	0	3	0	0	0	0	0	0	0	5	0	0	0	0	0	0	0	38	0	6	3	0	0	23	0	0	0	0	0	0
344523	0	2	0	6	13	3	3	1	5	2	7	2	3	9	0	3	0	7	3	1	0	2	4	3	0	0	2	0	3	9	32	1	0	0	7	2	0	2	1	2	1	8	0	5	2	1	0	0	0
539328	0	4	0	0	0	1	0	0	8	0	0	0	0	2	0	0	2	0	1	0	0	0	0	0	0	0	0	0	0	0	0	0	2	0	0	1	0	4	0	0	0	3	0	0	6	0	0	0	0
356167	1	0	0	0	0	0	0	0	0	2	0	0	0	0	0	0	3	0	0	0	1	0	0	0	0	0	1	0	0	0	3	0	0	0	0	3	0	0	0	0	0	0	6	0	0	0	0	0	6
New.ReferenceOTU2586	4	1	0	0	0	0	0	0	2	0	0	0	0	0	0	0	5	0	0	0	0	0	0	0	0	0	0	5	0	0	2	1	0	0	0	6	0	0	2	0	0	0	3	0	0	3	0	2	3
292575	7	1	0	2	12	10	7	1	7	7	1	13	0	2	3	4	1	2	9	0	11	0	3	7	26	3	5	1	6	3	7	0	8	0	2	0	6	1	16	18	0	1	0	9	0	37	7	0	9
557051	1	6	4	0	0	6	7	12	1	11	0	0	0	0	5	31	3	0	6	0	1	0	12	0	3	5	3	5	5	23	0	29	0	0	23	2	3	15	9	0	0	0	30	4	2	7	24	0	17
303213	0	3	0	3	6	0	0	7	8	12	0	0	0	0	6	5	2	0	18	0	0	0	0	0	1	1	0	1	3	7	0	2	0	0	1	0	11	3	6	7	0	0	7	2	0	3	1	2	13
297065	0	11	0	0	5	0	0	0	0	0	0	0	0	0	3	0	0	1	0	0	0	0	0	0	0	0	0	0	0	1	0	1	0	0	0	0	4	0	0	0	0	0	0	1	4	15	0	4	1
300887	9	2	2	4	4	0	2	1	5	0	7	0	0	0	0	5	3	0	4	4	0	8	3	0	0	1	0	1	0	0	1	0	0	0	1	0	0	0	4	3	0	4	0	0	4	0	0	0	0
333195	0	3	4	0	11	25	0	7	5	4	0	5	0	8	0	28	3	1	5	0	8	1	9	10	3	18	3	11	3	4	5	0	2	0	23	3	0	1	5	3	0	2	4	0	10	3	5	5	12
262258	0	9	4	0	2	2	0	8	0	5	0	0	0	2	1	14	2	0	0	1	0	0	4	4	0	0	2	12	8	3	0	2	3	0	15	0	2	2	5	9	0	4	0	0	4	4	2	3	3
301678	0	0	2	0	0	0	0	0	1	0	0	0	0	0	0	0	1	0	0	2	1	0	1	0	0	0	0	2	0	0	0	0	0	0	0	0	0	0	5	0	0	0	0	1	0	6	5	2	13
318997	2	2	12	0	52	4	18	0	13	5	4	9	33	16	7	7	15	9	9	6	5	12	9	7	8	8	14	31	1	4	6	3	6	4	19	3	0	2	24	6	0	2	0	7	1	0	0	0	0
581384	14	33	14	1	1	2	35	12	12	6	5	4	12	9	15	2	11	2	9	2	7	0	13	0	6	5	15	6	18	1	0	6	5	28	10	5	4	1	17	14	0	0	9	2	8	16	12	20	32
1106006	0	2	0	0	0	0	8	5	0	0	14	0	0	0	4	0	0	6	5	0	0	0	8	0	5	0	1	1	0	0	0	9	3	0	2	0	0	2	0	2	1	0	0	0	1	0	0	0	0
552380	6	9	9	8	35	38	24	13	0	37	29	4	29	48	15	22	9	23	8	7	5	1	4	25	11	0	13	22	37	10	29	4	25	12	27	21	5	11	18	40	43	6	26	6	16	21	10	11	4
43051	0	1	0	2	0	0	0	0	0	0	0	3	0	0	1	0	1	4	1	0	0	0	2	0	1	0	0	0	3	4	0	0	0	0	1	0	1	3	0	1	0	0	5	0	1	0	0	0	0
318928	0	9	4	1	5	2	0	0	0	0	0	2	0	0	3	0	7	1	0	0	0	0	0	1	3	1	3	2	7	7	2	4	0	1	0	2	5	3	0	2	0	1	11	2	0	57	19	1	25
1068836	0	0	0	0	0	0	0	0	0	0	0	0	0	0	0	0	0	0	0	0	0	0	0	0	0	0	0	0	0	0	0	0	0	0	0	0	0	0	0	0	0	0	6	0	0	8	7	1	10
148925	9	22	3	45	15	21	3	2	9	10	0	61	1	8	30	36	21	5	17	25	4	6	11	3	67	18	0	6	46	16	16	19	12	15	12	2	12	14	4	38	2	13	0	20	5	0	0	0	1
510233	0	0	0	0	0	0	1	4	1	0	0	0	0	0	0	4	0	0	0	0	0	0	1	0	0	1	0	6	0	5	0	2	0	0	0	0	0	0	1	0	0	0	1	0	0	0	5	0	0
351663	0	2	2	0	2	2	15	0	0	10	21	3	0	19	7	8	4	7	3	3	1	9	4	8	3	6	0	5	1	12	1	4	8	7	1	4	2	0	6	2	1	8	1	7	4	0	10	3	2
New.ReferenceOTU1364	0	1	0	0	0	0	4	0	0	0	3	0	2	2	0	0	0	1	0	0	0	0	0	0	0	0	0	3	0	0	0	1	2	0	0	0	0	0	0	0	0	0	0	0	0	0	0	7	0
43052	0	0	0	0	0	0	0	0	1	1	1	0	2	4	1	3	0	4	2	2	0	1	2	0	0	2	0	0	0	3	5	2	4	4	0	2	0	7	0	0	0	0	0	1	4	1	0	1	0
308786	2	1	0	1	2	0	0	1	3	0	13	1	0	2	2	0	0	0	2	0	4	5	0	0	0	1	0	0	10	0	0	0	0	0	3	0	0	0	1	5	0	0	0	0	0	4	6	0	0
New.ReferenceOTU181	0	4	12	11	1	5	4	4	4	0	7	16	0	15	3	0	2	23	3	5	4	1	4	2	3	5	10	0	1	0	0	0	0	2	7	4	3	18	0	1	0	1	0	0	1	0	5	0	16
322931	0	0	0	3	0	1	3	0	0	1	3	0	4	0	1	0	2	4	0	0	0	9	0	0	1	1	1	1	6	0	0	0	0	2	0	3	0	0	0	1	0	0	1	0	0	3	0	0	5
362342	9	2	14	2	0	1	3	0	0	0	7	0	1	5	3	2	6	2	6	6	4	14	5	2	6	1	2	10	0	1	6	3	0	5	3	3	1	2	3	0	6	35	3	3	2	5	2	9	6
608244	0	0	0	1	3	7	0	4	11	7	6	0	0	9	17	7	3	9	8	13	8	8	9	1	11	0	3	2	1	6	3	0	2	0	9	11	1	6	0	3	4	10	0	11	6	0	3	9	0
775976	0	0	0	1	0	1	6	0	0	0	2	1	3	0	1	0	0	3	0	0	0	0	2	2	2	0	4	3	1	0	2	0	1	0	0	0	0	1	1	4	0	1	0	0	3	0	0	0	0
New.ReferenceOTU160	0	0	0	0	0	0	0	0	0	0	0	0	0	2	8	0	0	1	0	0	0	0	0	0	9	0	0	16	3	0	0	0	0	0	0	0	0	0	21	18	0	0	0	0	0	0	0	0	12
New.ReferenceOTU2742	0	0	1	0	2	2	0	0	3	2	0	0	0	0	0	0	3	0	2	4	0	0	1	0	3	2	0	0	0	2	0	1	1	0	0	2	0	0	4	0	0	7	0	0	0	0	5	0	0
294390	2	0	0	0	0	1	3	5	0	0	2	0	2	0	5	0	0	0	0	0	2	1	2	0	3	0	0	2	0	0	0	0	0	0	0	0	3	1	2	0	0	0	0	1	0	0	0	0	0
New.ReferenceOTU2108	0	1	0	0	1	0	0	0	0	2	2	0	0	0	0	1	0	0	0	0	0	1	0	3	0	0	0	0	0	4	0	0	0	0	0	0	0	0	0	0	0	5	0	0	0	0	2	0	0
New.ReferenceOTU1649	0	0	0	0	5	4	2	0	2	1	1	0	0	0	3	0	6	2	3	0	0	0	0	0	1	0	0	1	0	0	0	0	0	0	0	1	0	3	0	2	0	2	0	0	0	0	2	2	0
New.ReferenceOTU2263	0	0	0	1	0	1	0	0	0	2	2	0	0	0	0	0	2	3	0	0	0	11	0	6	0	0	0	0	0	0	0	0	5	3	0	3	1	0	0	1	0	1	0	0	0	0	0	9	0
367946	19	12	9	13	1	13	10	7	8	2	19	29	7	5	5	7	31	32	14	20	25	45	4	31	3	17	0	13	10	8	17	2	37	24	5	24	2	8	4	5	5	18	12	7	6	4	11	14	2
581201	0	0	0	2	0	5	0	0	0	1	0	7	0	1	2	0	0	11	0	0	0	1	0	2	1	0	0	6	1	5	4	6	1	6	5	1	5	7	4	2	2	0	0	0	0	0	0	0	0
104144	0	0	11	4	4	0	0	1	0	7	0	1	6	0	0	8	6	0	0	0	0	4	1	0	0	0	1	2	1	0	0	0	2	0	5	1	5	3	27	0	0	0	0	0	6	0	0	2	0
New.ReferenceOTU1346	1	0	0	0	1	0	0	1	0	1	0	0	0	0	0	0	0	0	4	0	0	0	0	0	0	2	1	0	0	1	1	7	0	0	0	4	0	0	0	0	0	3	2	1	2	0	0	6	3
583116	0	1	0	0	0	7	5	3	1	4	0	2	10	0	4	0	1	0	0	1	1	3	3	5	0	1	0	1	2	2	3	0	1	2	0	0	2	0	0	2	3	2	0	10	1	0	0	0	0
235212	13	3	6	3	7	27	0	9	5	4	9	21	3	14	14	6	12	8	0	4	0	2	16	18	2	18	5	2	22	6	7	10	4	9	2	3	0	11	5	11	0	23	8	0	7	0	7	2	2
293621	0	0	0	3	0	0	1	24	0	5	9	0	0	4	5	120	0	0	6	0	75	2	28	0	0	23	3	75	15	15	1	13	0	9	4	0	39	14	101	14	0	1	23	13	9	18	35	0	2
New.ReferenceOTU2625	0	4	21	1	5	3	0	0	21	5	0	14	0	0	3	0	0	0	3	1	6	0	0	2	12	2	3	4	1	4	7	2	5	0	2	0	1	3	1	0	0	14	0	1	0	4	3	3	1
New.ReferenceOTU145	0	0	2	1	0	0	1	0	0	3	4	0	0	0	0	5	0	0	4	0	4	0	0	0	1	0	6	3	0	8	0	0	0	16	2	0	1	0	2	2	0	0	1	0	0	0	3	0	0
New.ReferenceOTU2313	0	0	0	1	6	4	2	2	3	13	0	0	0	0	0	6	3	0	1	0	0	2	2	7	0	0	5	5	0	0	5	2	0	0	1	2	3	7	2	4	3	0	0	0	3	6	3	13	2
298700	0	0	0	0	2	0	0	4	0	0	2	2	1	1	1	5	1	1	4	0	2	0	16	0	0	4	2	14	0	2	2	9	1	0	2	1	2	2	0	0	0	8	0	0	2	0	0	0	0
626544	0	1	1	0	0	8	0	0	0	0	0	0	0	0	3	0	0	0	2	0	0	0	5	2	0	0	2	4	1	7	2	5	0	0	0	0	0	0	0	3	0	0	1	3	0	5	0	0	7
719058	1	3	14	35	0	16	10	14	15	14	26	15	0	28	7	26	16	15	10	11	10	15	18	7	1	28	19	5	22	12	5	26	6	17	11	11	14	29	0	34	0	16	4	10	8	7	24	40	2
New.ReferenceOTU2497	0	0	0	2	7	6	0	0	0	0	0	0	4	0	3	8	18	0	2	0	3	2	0	3	4	0	0	4	0	0	0	2	0	0	0	0	2	1	0	3	0	0	0	0	6	2	5	0	0
321960	5	1	4	4	23	7	22	1	6	10	12	1	31	10	23	9	0	19	7	21	7	21	4	3	14	4	4	5	7	9	2	9	12	10	3	17	3	3	3	4	6	3	0	5	13	0	0	0	0
307900	0	5	4	10	0	14	5	8	0	2	5	8	6	6	8	10	2	4	0	3	10	0	1	0	2	0	1	3	1	2	0	0	2	10	5	0	1	1	0	15	0	1	0	4	2	0	0	0	0
450576	3	0	6	2	0	0	1	5	0	1	0	0	0	5	2	2	0	0	8	0	0	4	1	6	0	0	1	0	12	2	1	2	4	2	0	1	2	0	1	3	0	0	1	2	0	0	0	0	0
New.ReferenceOTU2029	0	4	1	0	0	3	0	0	0	0	0	1	0	1	4	11	0	2	0	0	2	0	5	3	1	0	1	5	7	8	4	0	1	1	0	0	2	0	1	5	0	0	1	0	3	0	1	0	0
592857	0	1	2	0	0	2	0	0	0	1	2	1	4	0	11	10	0	0	0	0	0	9	3	7	7	2	6	0	3	0	1	0	2	6	1	1	5	5	0	13	0	3	0	1	0	0	2	0	1
4302396	0	0	0	2	0	0	0	0	0	0	3	4	5	1	0	0	1	1	1	0	0	0	0	0	1	4	0	0	4	0	1	3	0	5	0	1	3	1	3	6	0	0	2	0	0	0	0	0	0
New.ReferenceOTU2554	0	3	2	0	0	0	0	0	1	0	2	0	0	0	0	2	2	0	0	0	1	0	3	0	0	1	0	0	0	3	1	2	0	0	8	0	0	7	0	0	0	7	0	4	11	0	5	0	0
331478	0	1	0	0	3	1	0	6	0	0	2	0	0	1	0	6	1	0	0	0	0	0	1	0	0	3	1	0	0	6	0	1	0	0	7	3	0	4	0	0	0	0	0	3	4	0	0	0	0
New.ReferenceOTU719	0	0	1	1	0	3	0	1	1	0	0	5	0	0	0	0	0	0	0	0	0	0	1	2	0	6	0	0	0	0	0	0	0	0	3	1	0	0	0	3	1	0	0	0	4	0	1	1	3
New.ReferenceOTU1534	0	1	4	0	0	2	0	0	5	0	0	0	0	0	0	5	0	0	0	0	0	0	1	0	0	0	4	3	1	6	0	0	0	0	0	0	0	0	2	1	0	1	0	0	0	0	2	0	1
New.ReferenceOTU177	0	0	1	0	0	0	0	0	0	4	0	0	0	0	0	9	5	0	0	0	0	2	0	3	0	0	1	0	0	1	0	1	0	0	1	5	0	0	1	2	0	3	0	1	2	2	0	0	1
528722	0	3	0	3	0	0	3	0	0	0	0	5	6	1	4	3	11	5	2	0	2	2	4	19	2	0	4	1	0	0	0	0	0	0	0	2	6	0	2	0	0	8	0	1	0	0	0	0	0
New.ReferenceOTU1099	1	3	2	0	0	4	0	3	0	1	1	1	0	4	0	0	2	0	1	0	1	0	5	7	0	1	1	0	0	2	3	2	0	0	2	0	0	1	0	1	0	0	1	0	1	2	5	2	4
193895	0	0	0	1	2	0	0	0	0	0	0	0	2	0	0	0	1	0	0	0	9	0	0	0	2	1	0	0	3	0	1	0	0	2	0	0	4	0	0	9	0	0	0	0	0	0	0	0	0
4338990	2	0	0	0	0	15	0	0	0	0	3	2	2	1	0	0	1	0	0	0	0	0	1	0	0	0	1	0	0	0	0	0	0	5	0	1	1	0	3	0	0	0	0	0	0	0	0	0	0
537622	2	0	0	1	0	0	1	0	0	0	1	6	17	0	6	6	24	0	1	1	0	0	1	5	5	0	1	0	2	1	2	0	0	0	0	0	1	0	0	4	0	3	0	0	0	0	0	0	0
New.ReferenceOTU1351	2	1	0	0	0	2	0	0	0	2	0	0	2	5	0	1	6	0	0	0	0	0	0	8	0	1	6	0	0	0	0	0	0	3	0	0	0	1	1	0	1	0	0	0	0	0	1	0	0
New.ReferenceOTU427	8	10	3	7	0	45	167	7	2	16	49	55	150	114	119	103	18	39	42	0	50	11	11	208	42	10	7	18	17	24	2	0	20	24	16	22	24	26	9	11	10	5	7	5	21	0	19	2	1
850841	0	0	0	0	0	0	0	0	0	0	0	0	0	0	0	0	0	0	0	0	0	0	0	0	0	0	0	0	0	0	0	0	0	0	0	0	0	0	0	0	0	0	1	0	0	0	7	4	0
New.ReferenceOTU2648	14	4	4	10	3	57	22	25	1	5	12	5	91	37	30	71	14	30	4	10	8	10	10	72	13	14	10	2	20	15	10	3	13	10	11	29	30	10	10	20	5	0	23	1	11	7	42	13	0
975259	0	1	2	2	1	3	8	0	1	0	10	6	17	8	29	16	12	4	8	5	5	7	11	13	5	0	1	5	13	5	1	0	3	8	0	3	7	3	5	25	0	0	0	0	5	0	7	5	0
552448	0	3	1	0	0	3	23	1	1	0	7	5	15	8	15	41	6	9	2	0	27	1	2	10	11	10	3	3	8	4	0	0	0	1	4	0	12	9	6	13	0	0	7	1	9	0	11	1	2
4466706	0	0	0	0	0	0	0	0	0	0	0	5	0	0	29	0	0	0	0	0	1	0	0	0	24	0	0	0	0	0	0	0	0	0	0	0	1	0	5	0	0	0	0	0	0	0	0	0	0
547348	0	0	2	0	0	2	3	0	2	0	0	0	21	0	6	2	3	0	4	1	0	0	0	15	7	0	1	0	4	0	0	0	0	0	0	0	0	1	0	20	0	0	0	3	0	0	0	3	0
New.ReferenceOTU2151	0	0	1	0	0	4	4	1	0	0	3	0	7	3	6	2	8	2	1	0	5	0	1	19	2	0	1	0	5	0	0	0	0	0	3	0	0	0	0	7	0	0	1	0	0	0	0	2	0
559659	0	5	20	8	1	3	2	3	6	10	31	14	7	11	14	60	13	25	27	7	12	3	6	13	13	2	12	11	15	5	10	4	4	12	6	12	4	15	3	19	2	10	5	15	1	3	20	3	6
1599042	0	3	1	7	0	3	14	4	1	2	5	1	7	8	11	26	0	9	0	1	13	0	6	7	20	13	0	5	1	1	0	3	0	7	10	4	6	0	4	0	0	0	1	0	6	0	3	1	1
New.ReferenceOTU2	0	0	3	0	0	9	0	1	2	0	0	0	0	2	0	0	0	0	0	0	0	0	0	3	0	1	0	0	0	0	0	0	1	0	0	3	1	3	0	0	0	0	0	1	1	0	1	1	0
New.ReferenceOTU7	0	0	0	0	1	0	0	4	0	0	0	0	0	0	0	2	0	0	0	0	1	0	2	6	0	9	5	3	0	0	0	0	2	0	0	2	0	0	0	2	0	1	0	0	0	0	2	0	0
300613	2	2	0	0	0	2	1	0	1	0	4	4	1	3	0	0	0	0	0	2	0	0	0	1	0	0	7	0	0	0	0	0	1	0	4	0	1	3	1	2	0	14	0	0	3	0	0	0	0
New.ReferenceOTU601	2	3	4	0	1	0	0	4	0	1	1	0	0	1	0	1	1	0	0	0	3	0	0	0	0	0	3	1	1	0	1	1	0	8	0	0	2	4	0	3	0	0	0	1	0	1	7	1	1
389566	2	2	0	0	1	6	0	0	5	1	0	0	2	1	0	6	5	0	0	0	1	0	9	1	1	7	2	5	0	1	4	1	3	0	6	7	0	2	0	0	0	4	2	0	1	1	3	9	5
322282	0	2	0	0	0	2	0	0	2	0	0	0	0	0	0	3	2	0	2	0	1	0	5	0	0	3	0	11	0	2	0	4	2	0	1	0	2	3	0	0	0	0	2	0	2	0	0	1	0
356245	1	9	1	0	2	5	0	0	6	1	0	0	0	0	0	0	8	0	0	0	3	0	2	6	0	1	1	0	0	5	4	1	27	1	2	7	0	9	0	0	0	0	0	0	11	0	0	2	0
4365940	0	0	3	0	0	0	0	0	1	0	4	4	3	0	0	3	3	0	8	0	0	0	0	1	0	0	2	0	1	0	2	1	0	0	3	0	0	0	0	3	0	0	0	0	3	0	0	0	0
41287	0	0	1	0	0	0	0	0	0	0	0	0	2	2	0	9	9	0	0	0	3	0	4	7	1	0	0	0	0	1	2	2	0	0	0	2	0	1	0	0	0	0	0	0	1	0	0	2	0
New.ReferenceOTU1222	0	0	2	1	0	3	0	0	0	0	1	2	1	0	0	0	3	0	4	4	1	0	0	4	0	2	3	0	0	3	0	5	0	0	0	3	0	0	0	0	0	0	0	2	0	0	2	1	0
309745	0	0	0	0	0	0	0	0	0	0	0	0	0	0	0	2	1	0	0	0	0	0	0	0	0	0	0	0	0	0	0	0	0	0	0	0	0	0	0	0	0	0	4	1	0	2	24	1	0
New.ReferenceOTU1515	2	12	5	4	0	48	16	0	8	2	17	1	44	26	15	31	30	15	22	5	13	2	7	18	10	21	3	12	8	5	4	1	2	2	12	13	6	1	9	15	4	8	0	5	20	0	2	0	0
New.ReferenceOTU2740	0	0	0	0	0	5	1	2	0	0	5	0	0	0	1	2	0	0	2	0	3	0	0	13	4	0	2	0	3	0	2	0	0	0	0	1	0	2	0	2	0	2	0	0	0	0	1	6	0
New.ReferenceOTU1912	0	6	0	0	0	13	1	3	4	0	0	0	7	0	14	2	3	1	1	3	3	0	11	10	3	16	1	1	5	2	5	2	15	0	5	3	0	2	0	6	1	2	0	0	3	0	9	0	0
4439487	3	0	3	3	1	3	0	4	3	0	1	0	3	5	0	3	1	0	0	3	3	1	0	1	0	2	1	0	1	1	0	0	1	0	1	0	7	1	0	3	0	0	0	2	0	0	0	0	0
New.ReferenceOTU1816	0	0	0	0	2	1	0	2	0	0	0	0	0	0	20	2	2	4	11	0	0	0	1	0	5	0	2	0	0	0	0	5	0	0	2	0	2	1	1	3	0	0	0	5	0	0	1	4	0
New.ReferenceOTU1003	0	1	0	0	0	5	0	0	0	0	0	0	0	0	0	9	1	0	2	2	0	0	4	5	0	1	0	1	0	3	1	0	1	0	0	4	0	0	6	0	3	0	4	0	4	0	1	0	0
New.ReferenceOTU1713	0	2	0	1	0	1	0	0	6	0	6	2	0	1	0	3	0	0	0	0	0	0	0	0	1	0	4	0	0	0	0	0	0	0	2	4	3	7	0	0	0	0	0	0	0	0	0	0	0
294545	0	2	0	0	0	2	0	1	3	2	0	0	0	2	2	0	0	0	0	1	0	1	2	1	4	0	2	1	18	2	6	2	0	0	0	0	0	7	4	0	1	2	0	0	0	0	0	0	0
817995	1	2	1	0	0	3	0	1	6	6	0	3	3	1	0	2	0	1	5	3	0	2	2	0	2	0	3	0	0	0	5	1	0	4	0	0	0	0	1	1	1	15	0	5	0	0	2	0	1
340809	3	1	1	4	0	0	1	4	4	0	4	1	2	3	3	12	0	11	3	1	9	6	0	7	4	6	1	0	2	1	1	1	0	0	5	3	2	0	3	2	0	5	0	1	1	0	0	0	0
New.ReferenceOTU1254	0	0	0	0	0	0	3	0	0	0	0	0	3	0	2	0	0	1	3	1	1	0	0	3	0	0	0	0	0	4	0	0	0	0	8	0	2	0	4	0	0	0	0	5	0	0	0	0	0
295748	2	0	1	1	2	0	1	0	2	7	4	0	0	0	4	0	0	0	11	0	0	3	0	1	2	0	0	1	0	0	2	2	0	2	1	0	1	0	0	0	0	0	0	2	4	1	1	0	0
368236	0	4	3	4	0	1	0	0	7	1	1	6	0	11	0	0	0	4	4	0	1	5	7	0	0	1	0	2	8	1	3	5	3	0	2	8	8	3	1	1	0	1	0	3	1	0	0	0	0
375106	0	0	1	0	1	5	4	0	3	0	0	1	1	0	0	0	10	5	0	1	4	5	14	27	5	10	0	1	4	0	19	4	12	0	1	2	1	11	0	0	12	14	1	0	4	0	0	1	0
334839	1	4	0	0	0	6	4	0	7	1	0	1	5	0	2	0	0	0	0	0	0	0	2	0	14	0	0	0	0	0	0	0	0	2	1	5	0	6	0	0	0	1	0	3	6	0	0	0	0
New.ReferenceOTU1101	0	0	2	1	0	11	0	1	0	4	0	3	0	3	0	0	4	0	1	1	4	1	2	3	3	1	4	7	4	2	8	3	3	0	3	2	0	2	1	2	7	7	5	1	1	0	2	2	4
New.ReferenceOTU2476	0	3	0	0	0	2	0	0	4	0	5	1	0	4	3	2	0	0	0	0	0	1	0	0	3	1	0	1	0	3	0	0	2	2	0	0	3	0	0	2	0	0	11	0	6	0	51	1	0
4335229	0	1	1	0	2	5	0	0	0	5	0	0	0	0	2	2	2	0	0	0	1	0	6	0	0	0	0	1	3	0	4	3	1	0	0	0	7	0	0	1	0	0	0	0	0	0	0	0	0
New.CleanUp.ReferenceOTU14957	0	0	0	0	0	0	9	2	0	2	7	4	0	0	2	0	0	0	0	0	3	0	0	0	3	0	3	0	0	0	0	0	0	0	5	0	0	0	2	0	0	0	0	0	0	0	2	0	0
New.ReferenceOTU189	0	2	5	8	0	4	0	1	0	0	2	0	0	0	9	0	0	0	0	0	0	0	0	0	8	1	3	0	3	2	0	0	0	0	4	0	4	1	1	6	0	2	0	1	0	0	0	0	0
433722	33	50	15	68	40	32	80	11	47	62	47	30	66	42	54	45	28	48	34	28	47	52	36	42	58	17	30	23	25	33	39	45	35	55	16	18	39	29	65	24	35	28	0	79	24	0	0	0	0
721569	4	1	0	4	2	1	6	2	2	7	11	9	10	11	2	6	2	3	10	5	4	13	3	1	4	0	2	3	1	1	4	3	1	2	2	4	7	0	0	2	0	7	81	17	7	54	55	39	27
792399	0	0	1	2	1	0	1	0	0	2	4	0	0	0	2	0	0	2	0	0	0	0	1	1	1	0	1	1	1	0	0	0	1	6	0	0	0	0	1	0	0	0	0	0	0	0	0	3	0
558599	35	23	22	21	28	14	10	4	17	47	23	13	77	23	19	31	3	39	79	30	24	31	28	35	10	9	22	6	15	29	24	34	20	34	37	22	26	11	9	23	13	56	0	84	23	0	0	0	0
580121	1	2	0	4	0	2	1	5	1	1	2	7	6	4	0	3	1	0	5	3	2	0	1	3	2	4	6	0	0	3	40	3	4	0	0	5	0	1	5	2	0	8	31	2	0	15	17	25	16
289495	0	0	0	0	0	0	0	0	0	0	0	0	0	0	0	0	0	0	0	0	2	0	0	0	0	0	0	0	0	0	0	0	0	0	0	0	0	0	0	0	0	0	45	0	0	30	76	6	43
641783	86	92	183	98	32	60	171	162	108	66	277	384	126	198	229	196	105	162	17	117	157	147	48	174	263	114	100	132	125	192	35	39	211	263	145	53	187	90	68	136	10	62	30	45	187	1	35	10	16
New.ReferenceOTU1307	1	0	0	3	0	4	0	1	2	0	1	6	1	1	1	0	7	0	0	0	0	0	0	0	3	0	0	2	4	0	2	0	0	1	0	0	0	1	0	0	0	0	1	0	0	0	1	0	8
349680	13	9	1	5	1	9	2	5	5	6	1	12	15	22	15	1	9	12	5	2	2	10	1	20	17	7	1	2	16	5	11	2	5	2	3	10	12	1	5	8	59	6	4	8	4	3	0	5	0
352647	0	1	0	0	0	0	0	0	0	0	0	0	0	0	0	0	0	0	0	0	0	0	0	0	0	0	0	0	0	0	0	0	0	0	0	0	0	0	0	0	0	0	7	0	0	4	6	0	2
292816	17	3	0	0	4	3	3	0	0	3	3	0	0	2	2	1	0	2	3	0	9	0	1	13	1	0	3	0	0	2	0	0	3	0	0	3	0	0	0	4	1	0	0	1	3	0	0	0	0
427159	4	3	3	5	4	0	13	1	2	2	7	0	12	2	3	6	3	9	6	0	2	5	6	7	7	4	6	2	12	3	2	1	11	0	1	1	2	3	2	10	0	2	0	5	17	2	0	0	0
870421	27	33	31	39	85	41	129	18	46	40	36	14	67	87	67	39	57	72	98	52	77	71	79	27	92	32	65	31	122	73	60	61	28	20	67	30	51	51	44	80	18	57	45	79	51	65	38	51	40
New.ReferenceOTU111	1	0	2	0	1	0	2	0	0	1	0	0	0	1	0	1	4	5	1	0	6	1	1	2	4	0	0	0	1	0	0	0	3	1	2	7	0	1	2	1	1	0	0	0	2	0	0	0	0
586562	0	0	3	3	0	0	0	0	0	0	1	0	3	4	7	0	0	18	9	1	0	1	0	0	5	2	2	1	0	3	0	3	0	0	0	0	5	0	3	0	0	1	21	0	1	63	51	32	60
291171	0	6	6	9	4	6	3	2	1	8	15	7	6	30	12	12	0	21	10	4	16	2	11	11	7	3	16	4	0	11	32	3	5	1	0	4	2	5	9	8	0	5	0	17	7	0	0	0	0
311087	0	0	0	2	0	0	0	0	0	0	0	0	0	8	2	2	0	1	3	0	1	4	1	0	0	0	1	6	4	2	0	0	0	0	1	1	1	2	2	9	0	0	0	0	6	0	0	2	0
319400	1	0	0	0	2	2	2	0	0	5	0	0	2	8	2	1	0	1	0	1	0	1	4	0	4	0	1	0	2	3	0	3	0	0	5	2	11	4	4	1	0	0	0	0	1	0	0	0	3
319818	13	7	16	16	26	9	34	10	10	8	53	3	122	131	13	23	20	67	25	13	34	12	25	7	14	31	18	32	35	13	55	8	31	27	17	12	14	6	18	43	0	7	0	22	15	0	0	1	0
570341	3	8	32	50	24	1	104	18	11	2	39	0	67	82	24	36	3	70	15	21	26	24	8	2	13	19	24	9	70	13	12	6	10	1	15	26	10	27	8	35	0	9	0	2	29	2	2	0	5
720093	12	4	21	12	11	24	19	6	5	1	27	9	44	93	4	22	21	13	15	14	12	6	34	24	6	6	33	5	31	13	69	23	4	9	16	15	1	12	10	62	3	5	25	11	22	143	50	43	36
525914	0	0	0	0	0	0	0	0	0	0	0	0	0	0	0	0	0	0	0	0	0	0	0	0	1	0	0	0	0	0	0	0	0	0	0	0	0	0	0	0	0	0	2	0	0	24	8	20	22
New.ReferenceOTU2020	0	0	0	0	2	0	0	0	0	0	0	0	0	1	0	3	0	1	2	0	0	0	4	0	0	1	0	0	0	1	0	0	0	0	0	1	1	0	0	2	0	1	6	0	1	4	7	12	7
New.ReferenceOTU2661	7	8	15	27	4	19	26	4	19	20	27	18	23	44	12	15	16	27	9	12	10	14	18	19	21	16	11	19	20	14	26	4	31	33	13	22	16	39	15	9	4	19	0	9	13	0	0	0	0
353173	23	6	4	6	6	11	11	9	6	12	11	41	11	56	11	26	2	24	9	23	27	43	17	23	3	23	13	4	29	8	13	1	13	14	2	4	9	8	7	28	2	6	0	7	14	1	1	0	0
558420	4	2	2	1	3	3	7	3	0	0	16	19	18	11	7	5	1	3	3	6	4	11	2	8	5	2	13	1	6	8	8	8	3	9	1	5	4	1	7	7	1	5	5	3	4	31	13	12	4
528782	41	43	29	75	61	25	140	20	46	37	111	36	207	257	56	100	66	108	113	32	55	62	75	67	43	52	46	34	51	69	145	32	57	59	56	67	39	57	52	72	11	52	1	60	65	9	7	2	0
592139	42	36	24	43	56	43	97	51	51	42	139	90	284	243	130	119	55	234	69	70	93	62	62	78	87	57	52	95	51	80	196	49	66	69	31	81	88	48	106	65	9	54	72	83	53	211	106	76	80
532384	0	0	0	2	1	0	5	0	0	2	6	0	2	1	2	0	0	3	0	0	0	0	1	0	4	0	0	0	0	1	1	0	0	0	0	0	2	0	0	2	0	3	0	0	0	4	2	0	1
539202	28	13	29	23	7	22	81	15	26	24	111	12	444	295	95	50	19	374	41	8	63	59	36	40	81	10	22	10	11	18	43	11	65	36	22	9	40	16	7	34	0	52	0	23	23	1	1	1	0
524439	0	0	1	1	1	0	0	0	0	0	2	1	2	0	0	3	1	1	1	0	0	0	0	0	2	0	0	2	0	0	2	0	0	0	0	0	0	1	0	0	0	1	1	6	4	1	1	1	0
531867	3	0	0	3	3	3	3	4	1	0	0	1	3	4	7	2	3	4	1	7	6	1	1	1	5	1	3	3	4	1	3	0	0	6	1	1	7	0	2	3	0	0	75	2	0	103	23	35	47
537959	2	3	2	8	5	0	6	6	0	5	2	2	4	8	4	9	6	4	4	4	2	10	6	3	13	2	13	9	4	6	14	2	1	3	0	2	14	0	15	4	0	7	3	8	7	1	2	0	2
520840	0	0	0	0	0	0	2	0	0	0	0	0	0	1	0	0	0	0	0	0	0	0	0	0	0	0	0	0	0	0	0	0	0	0	0	0	0	0	0	0	0	1	3	0	0	16	3	1	5
576712	9	20	38	28	17	20	49	25	17	15	40	3	35	81	35	24	4	31	58	17	13	43	11	19	46	21	48	36	44	50	28	15	5	4	16	20	36	33	34	51	20	19	0	27	49	0	0	0	0
25695	1	6	0	0	0	0	2	0	5	4	4	3	3	8	2	1	6	1	13	2	5	7	5	7	6	0	0	0	1	3	0	2	0	12	0	0	2	1	0	0	10	2	0	1	2	0	0	0	0
New.ReferenceOTU651	0	0	0	0	0	2	0	0	0	0	0	0	2	0	0	0	0	0	0	0	0	0	0	0	0	0	0	0	0	0	0	0	0	0	0	0	0	0	0	0	0	0	2	0	0	12	1	7	6
313153	0	4	2	0	0	5	5	2	0	4	10	7	45	1	1	0	6	10	5	8	9	6	2	5	4	0	0	0	4	3	0	0	0	16	1	1	0	0	0	0	17	5	0	3	0	0	0	0	0
366633	1	0	0	3	0	0	0	0	0	0	0	0	0	0	0	0	3	0	0	0	0	0	0	0	0	0	0	1	0	1	0	0	0	0	0	0	0	0	0	1	0	0	21	2	1	13	9	8	7
758482	3	5	8	3	1	9	6	13	16	4	38	32	13	8	11	25	11	25	10	9	12	7	19	7	12	9	15	13	9	14	8	2	5	33	11	4	15	4	29	8	2	7	3	9	12	2	1	3	0
353631	2	0	0	0	0	3	0	0	2	0	0	0	4	0	0	0	0	2	4	0	0	0	0	0	0	0	0	0	0	0	2	0	0	0	0	0	5	0	1	0	0	0	10	0	0	42	54	58	6
521792	4	13	1	7	5	0	25	3	2	1	11	4	20	29	5	8	7	16	21	16	4	12	6	9	1	2	10	8	5	6	9	3	18	8	4	2	6	3	7	10	1	1	3	7	6	10	1	3	6
178242	0	0	0	0	0	0	0	0	0	0	0	0	0	0	0	0	0	0	1	0	0	0	0	0	0	0	0	0	0	0	0	0	0	0	0	0	0	2	0	0	0	0	23	0	1	22	33	26	23
335516	0	0	0	0	1	0	0	0	0	0	0	0	0	0	7	1	0	0	0	0	1	0	0	0	3	0	0	0	0	0	0	0	0	0	0	0	3	0	0	0	0	0	18	0	0	0	4	2	12
887025	2	1	0	1	0	1	6	6	1	3	4	0	7	1	7	0	0	15	3	0	0	0	0	9	0	0	4	0	2	1	0	2	6	4	0	1	1	1	0	1	0	0	1	0	0	6	0	3	0
345763	2	3	2	4	1	2	17	3	4	5	0	5	17	6	5	0	3	3	5	2	0	4	2	1	3	3	1	4	6	4	8	4	6	1	1	3	8	1	8	7	0	1	0	3	7	0	0	0	0
347085	0	1	5	9	2	11	63	4	0	17	26	98	9	6	9	6	3	26	1	2	59	21	4	4	12	8	1	49	24	7	2	1	0	66	10	7	55	3	71	10	0	7	18	2	1	6	0	6	0
1035392	12	1	9	15	1	18	31	28	4	3	43	220	3	9	11	12	1	26	6	17	46	1	8	6	9	18	3	20	43	20	0	0	1	22	26	2	49	1	23	44	16	14	4	2	13	0	2	0	0
359563	47	9	9	25	16	52	40	13	17	13	35	51	20	45	20	17	25	59	23	16	47	13	18	39	16	17	17	11	43	13	35	13	34	63	11	11	16	11	12	38	27	57	0	30	19	0	0	0	0
564941	4	3	0	1	1	2	9	1	0	4	9	0	4	11	3	1	11	8	1	0	0	10	0	2	4	8	0	3	1	2	0	0	7	9	0	5	1	2	2	4	1	2	0	2	0	0	0	0	0
359720	2	0	3	0	0	0	0	0	0	6	0	2	1	0	0	0	0	0	1	0	3	1	1	4	0	0	0	0	0	0	0	0	1	7	0	0	0	0	1	6	0	0	0	1	1	0	0	0	0
New.ReferenceOTU1266	0	0	0	0	1	0	1	0	0	2	0	2	0	0	3	0	0	0	0	0	1	0	0	1	2	2	0	0	0	0	0	0	7	0	0	3	0	1	7	0	0	2	0	0	3	0	0	0	1
1062061	58	77	80	102	15	65	183	103	106	79	135	99	89	134	37	89	94	148	48	72	102	214	58	146	41	122	48	73	52	120	92	83	135	107	207	100	90	88	33	19	8	35	0	45	89	1	4	1	1
355450	2	0	1	0	0	0	0	0	1	0	0	0	0	0	0	0	1	2	0	2	1	3	2	0	0	0	0	1	5	0	1	0	0	4	1	1	0	0	1	1	3	2	0	0	0	0	0	1	0
362078	12	0	1	0	0	6	0	1	0	0	2	3	6	0	0	0	0	32	0	0	0	0	2	0	3	6	0	0	0	0	0	0	7	5	0	0	0	0	0	0	2	0	6	0	0	1	13	12	6
553080	1	0	1	1	2	0	0	0	0	0	0	0	0	6	2	0	0	0	0	2	1	1	0	1	0	4	0	0	0	0	0	0	0	2	0	0	3	0	0	0	0	2	3	0	2	0	0	6	0
176645	23	3	4	2	9	7	11	5	16	1	6	2	1	16	2	0	0	15	4	1	9	19	0	4	0	6	1	0	0	11	14	2	21	3	3	4	6	0	1	0	11	1	0	0	0	0	0	0	0
199226	0	0	0	0	0	0	0	0	0	0	0	0	0	0	0	0	0	0	0	0	0	0	0	0	0	0	0	0	0	0	0	0	0	0	0	0	0	0	0	0	0	0	1	0	0	1	2	7	0
351927	46	55	74	77	8	44	93	75	67	66	106	34	40	109	50	142	72	178	77	33	139	163	97	88	42	72	69	39	64	49	25	20	69	186	86	53	70	49	53	61	51	40	1	53	61	3	0	0	0
318163	0	0	0	0	0	0	0	0	0	1	0	0	0	0	0	0	0	0	0	0	0	0	0	0	0	0	0	0	0	0	0	0	0	0	0	0	0	0	0	0	0	0	47	0	0	30	127	53	33
367217	4	0	4	0	2	0	2	4	1	1	5	3	0	3	0	0	0	3	0	0	2	2	1	3	3	0	6	5	0	0	1	0	2	3	7	0	1	0	4	2	0	0	45	2	2	22	134	55	15
333363	6	16	105	30	10	9	59	11	42	28	48	25	5	96	239	39	4	142	4	28	53	17	70	17	222	12	141	174	37	34	23	5	24	71	50	22	145	53	86	41	0	1	20	43	11	9	36	55	10
839964	1	2	2	3	1	4	2	1	0	2	2	0	0	0	0	0	3	0	0	0	0	8	0	1	1	0	0	0	0	0	1	2	6	0	0	0	0	4	0	0	2	1	0	0	2	0	0	0	0
655793	37	30	3	4	35	19	8	12	41	47	4	8	0	2	13	2	5	7	15	14	23	4	21	13	14	16	3	5	6	30	22	36	14	8	11	2	6	37	7	2	28	9	12	24	23	3	4	8	13
1110378	23	8	0	2	31	13	14	0	38	28	0	2	17	3	4	0	10	2	20	33	12	3	7	29	8	0	0	0	0	32	22	24	12	1	2	14	2	52	0	0	19	45	0	14	11	0	0	0	0
272953	11	76	77	18	73	87	9	38	77	91	10	12	16	14	21	50	32	16	53	24	67	30	83	52	27	64	111	63	55	90	157	121	99	15	106	106	22	124	30	60	133	40	0	46	122	0	1	0	0
New.CleanUp.ReferenceOTU3403	0	0	0	0	7	0	0	0	4	2	0	0	0	0	0	0	1	3	3	0	2	1	0	0	0	1	0	0	0	3	4	0	2	1	0	2	0	0	0	3	0	3	0	2	1	4	0	5	0
585073	1	0	0	0	0	1	0	0	4	0	0	0	0	0	0	0	0	0	0	0	1	0	4	1	0	0	1	0	0	1	1	1	0	0	0	0	0	0	0	0	0	1	37	1	0	73	53	145	70
New.ReferenceOTU1887	0	2	0	0	3	0	0	0	0	0	0	0	0	0	0	1	0	0	1	0	0	0	0	0	0	0	0	0	1	2	2	0	0	0	3	0	0	0	3	0	0	0	6	0	0	11	4	13	4
548692	30	41	102	80	66	170	51	83	51	23	82	35	89	112	54	100	56	71	43	77	88	72	131	61	48	124	173	138	118	91	242	60	213	51	116	157	35	66	49	118	116	133	0	41	146	0	0	0	0
349204	1	0	11	4	1	2	4	8	2	0	9	2	4	18	0	3	1	5	0	3	2	1	5	2	4	2	7	7	2	3	12	0	0	2	9	6	5	1	6	2	0	11	3	1	2	6	1	11	4
311718	0	0	0	2	0	0	0	1	0	0	0	3	1	0	5	0	1	0	0	1	0	0	2	0	0	0	1	1	0	1	1	1	2	0	4	0	0	0	0	0	1	0	31	3	0	36	29	68	47
New.ReferenceOTU2243	0	0	0	0	0	0	0	0	0	0	0	0	0	2	0	0	0	0	0	1	0	0	0	2	0	0	0	0	0	0	1	0	0	0	0	0	1	0	0	0	0	0	26	0	0	49	18	89	48
306778	0	0	0	0	0	0	0	0	0	0	0	0	0	0	0	0	0	0	0	2	0	0	0	0	0	0	0	0	0	0	0	0	0	0	0	0	0	0	0	0	0	0	1	0	0	0	4	21	12
338133	0	0	0	0	0	0	0	0	0	0	0	0	0	0	0	0	0	0	0	0	0	0	0	0	0	0	0	0	0	0	0	0	0	0	0	0	0	0	0	0	0	0	14	0	0	31	11	44	31
New.ReferenceOTU1227	13	11	4	0	4	18	3	0	4	14	4	9	3	2	0	0	4	8	4	5	5	2	6	9	0	0	3	0	10	9	18	7	27	0	3	4	0	9	3	4	11	1	8	2	3	3	1	10	13
New.ReferenceOTU1066	1	0	0	0	1	0	0	1	0	2	1	0	0	0	0	0	0	0	3	3	1	3	0	0	0	0	2	0	0	2	0	0	0	3	0	0	6	0	0	0	2	0	2	0	0	2	0	0	0
198814	14	16	38	32	12	52	22	55	17	31	103	14	9	9	7	33	22	50	4	11	34	23	28	36	19	43	32	71	19	27	40	14	43	56	19	6	12	19	46	24	43	48	29	34	85	17	31	28	28
522699	8	14	7	0	16	24	0	7	27	10	2	6	2	1	5	1	9	9	12	3	11	5	14	23	2	4	15	19	8	10	29	4	25	2	8	10	4	12	6	8	10	10	7	8	14	6	6	15	5
1136492	0	2	0	0	5	5	0	1	4	2	2	0	0	0	1	0	11	0	1	2	0	3	3	0	2	1	1	5	1	6	1	5	1	0	3	0	2	6	0	3	0	14	1	5	1	1	1	0	2
2792266	1	0	0	0	0	0	5	0	0	0	1	0	0	7	0	0	0	0	0	0	0	5	0	3	0	0	0	6	0	2	3	0	0	0	0	0	2	0	1	3	0	0	5	0	3	2	0	5	1
New.ReferenceOTU1196	4	1	2	0	0	8	1	4	3	7	5	2	0	3	3	6	1	4	3	1	1	6	7	3	0	0	4	3	3	11	1	3	2	3	4	3	1	7	2	0	7	12	9	12	7	2	0	1	2
New.ReferenceOTU364	0	0	0	0	0	0	0	0	0	0	0	0	0	0	0	0	0	0	0	0	0	0	0	0	0	0	0	0	0	0	0	0	0	0	0	0	0	0	0	0	0	0	1	0	0	0	0	19	7
334797	8	19	15	12	8	33	3	15	13	14	14	10	20	11	10	15	13	4	11	6	14	22	19	22	11	14	9	18	13	17	10	15	33	5	3	30	7	9	6	30	116	50	5	17	50	6	3	18	8
New.ReferenceOTU371	0	0	0	1	0	11	0	2	0	0	1	0	0	0	0	2	1	0	5	4	2	8	1	0	0	1	11	2	1	1	3	0	2	1	12	8	0	1	2	6	2	3	0	0	5	1	0	0	0
520720	0	0	0	0	2	5	0	0	0	2	0	2	1	0	2	0	1	0	1	2	0	2	3	0	0	0	3	0	0	0	2	0	0	2	1	0	0	0	0	0	11	2	5	0	0	8	1	0	0
36503	4	0	0	0	2	4	0	0	11	3	0	0	2	0	0	0	8	0	2	0	2	0	7	3	0	0	4	6	1	7	6	4	7	0	0	1	2	4	2	2	2	0	0	0	5	9	0	1	2
New.ReferenceOTU1493	3	0	1	0	5	17	0	0	0	0	0	0	0	0	0	3	1	0	0	0	0	6	2	12	0	6	3	2	8	0	50	3	9	0	1	17	0	4	1	1	3	7	2	3	7	7	0	19	13
New.ReferenceOTU392	0	0	0	1	0	0	0	0	0	0	0	0	0	0	0	0	2	0	0	0	0	0	0	1	0	3	0	0	6	0	7	0	0	0	0	0	0	0	0	2	0	0	0	0	0	0	0	0	0
New.ReferenceOTU2329	7	13	11	6	11	18	12	3	21	9	9	5	21	8	6	11	12	3	4	9	15	5	15	10	7	10	15	9	9	8	24	9	34	9	12	31	11	17	8	19	45	22	63	7	32	60	52	94	49
520931	7	20	4	6	14	16	5	1	21	7	9	4	7	11	7	4	9	3	6	12	15	9	13	8	4	14	12	17	7	2	23	5	31	6	13	29	4	11	8	12	40	26	3	0	15	0	0	0	0
New.ReferenceOTU2301	0	0	0	0	0	0	0	0	1	0	2	0	0	0	0	0	0	0	1	1	0	0	0	0	1	0	0	0	0	1	0	0	3	0	1	0	2	0	0	0	0	0	22	0	0	10	16	13	20
New.ReferenceOTU2367	7	32	33	3	16	1	17	10	19	9	4	0	3	1	25	22	9	1	26	4	20	2	10	3	13	11	32	25	9	19	33	28	23	0	28	8	8	21	9	8	4	1	40	12	23	11	9	24	20
510070	0	0	3	0	0	1	16	6	0	5	0	1	1	6	1	1	5	0	3	0	0	1	0	1	5	3	1	3	1	0	0	0	5	1	3	11	0	2	0	4	0	0	2	1	5	0	1	0	0
535399	6	0	5	0	6	15	0	9	1	0	0	5	4	1	0	3	9	1	2	0	10	2	9	5	0	1	11	6	11	3	15	1	6	15	5	15	0	19	2	10	4	12	0	2	1	5	13	3	11
New.ReferenceOTU1686	0	0	0	0	0	3	0	0	1	2	0	0	0	1	0	0	3	0	0	0	0	0	1	0	0	0	2	0	4	0	1	1	1	1	6	3	0	0	2	0	2	1	0	0	0	0	5	1	2
574122	8	2	1	14	24	15	15	0	9	24	8	5	37	9	14	7	8	11	22	37	34	1	18	18	33	0	8	2	1	0	36	3	22	1	10	11	8	18	1	1	100	8	18	36	8	15	12	13	15
40149	23	155	46	58	115	220	195	94	236	149	95	45	97	45	73	51	153	88	202	84	116	225	207	108	82	111	72	51	32	295	212	188	249	15	107	75	118	261	39	27	38	173	13	178	190	17	12	16	25
356187	0	1	0	0	0	2	2	1	0	0	0	0	3	0	0	0	0	0	0	0	0	0	1	0	0	1	0	0	0	2	6	1	3	0	3	3	4	5	0	2	1	1	15	5	2	19	27	58	57
544996	0	1	1	0	2	2	0	0	0	2	0	0	2	0	0	0	0	0	1	0	0	0	2	2	1	0	0	0	0	2	1	0	0	0	0	3	0	5	0	0	0	1	4	2	0	8	15	25	21
New.ReferenceOTU298	0	8	0	0	1	3	2	2	5	4	1	2	0	0	0	0	4	3	2	1	2	2	5	4	0	2	1	1	0	1	2	3	3	0	0	0	2	10	0	1	0	5	0	1	3	0	5	0	0
New.ReferenceOTU1305	4	1	1	1	1	0	0	1	0	0	2	1	1	2	0	1	0	0	0	1	0	2	0	0	2	1	0	1	2	6	10	6	1	0	2	0	0	2	0	0	4	3	0	3	2	1	3	2	0
360808	0	3	0	0	0	0	0	0	0	0	0	0	0	4	0	0	0	1	1	0	0	3	0	0	0	0	0	0	0	0	0	0	0	1	0	0	0	0	0	0	0	0	7	0	0	2	5	23	11
312628	0	1	9	4	0	1	5	5	3	0	6	9	2	1	1	4	0	8	0	6	13	9	5	9	8	1	10	3	8	2	7	2	1	16	7	2	9	0	3	5	0	1	0	5	7	0	0	0	0
366584	3	7	16	4	3	0	8	6	1	1	5	4	12	8	2	4	5	5	5	8	7	21	4	13	12	2	5	4	5	5	13	2	2	5	3	0	6	1	3	10	5	3	0	2	4	0	0	0	1
New.CleanUp.ReferenceOTU16875	0	1	3	1	0	0	3	0	1	0	2	2	0	4	5	0	2	4	0	0	2	7	0	6	2	0	3	2	10	4	2	0	1	3	8	0	9	1	3	3	0	1	0	1	5	0	2	0	0
New.ReferenceOTU725	1	5	3	8	3	0	11	1	0	2	9	6	6	8	5	3	4	12	8	12	19	26	6	12	19	4	18	11	15	15	6	2	3	24	19	3	29	5	7	4	0	0	237	12	12	71	315	50	80
322895	57	65	318	212	29	8	266	177	53	130	327	293	56	153	300	193	74	291	72	310	346	579	113	202	363	127	365	220	260	199	329	84	87	420	162	43	395	79	218	188	5	47	6	216	210	6	11	0	1
New.ReferenceOTU1012	0	1	1	0	0	0	0	0	0	0	3	2	2	2	0	0	0	0	1	1	0	0	0	0	0	0	1	5	4	2	1	0	0	5	0	0	2	5	0	3	0	0	0	0	1	0	1	0	0
819181	61	6	23	35	6	44	102	23	7	13	103	25	78	74	3	1	38	40	6	16	87	73	35	92	8	86	9	8	7	17	38	17	34	112	23	43	5	5	1	8	8	127	0	14	78	0	0	0	0
New.ReferenceOTU1518	1	0	7	1	0	3	0	6	0	1	4	0	0	4	2	3	1	4	0	0	0	2	2	2	0	1	6	2	0	3	5	3	6	0	5	1	2	8	1	1	0	1	0	4	1	0	0	0	0
324244	44	16	16	83	8	25	50	7	17	22	52	61	29	53	37	46	26	65	19	38	45	47	12	49	49	27	21	31	39	20	29	17	19	56	10	8	57	18	58	31	7	16	25	22	24	33	10	6	27
New.ReferenceOTU1474	1	0	0	2	0	0	0	1	1	0	1	0	0	2	2	0	0	0	0	0	4	0	0	0	0	0	0	6	0	1	2	0	2	3	0	1	0	2	3	1	0	0	4	0	2	2	1	0	5
290322	2	0	4	6	2	4	2	0	12	2	5	7	5	2	4	6	2	10	9	0	5	8	2	1	7	3	10	3	3	0	3	0	2	4	0	2	9	2	3	16	0	4	1	1	9	2	1	13	0
302809	7	13	4	16	3	7	14	3	6	8	5	11	4	4	4	10	14	11	7	10	9	9	9	12	8	0	2	5	5	9	1	2	3	20	8	14	8	2	2	8	2	15	6	4	23	4	4	10	2
291206	16	18	22	20	35	57	1	46	34	19	0	4	27	38	30	21	38	3	43	22	57	66	56	54	7	32	27	1	24	41	92	21	32	42	38	47	24	14	18	17	124	99	13	42	44	48	20	36	15
New.ReferenceOTU425	0	0	1	1	3	1	3	0	0	3	0	0	0	0	1	0	3	0	0	0	3	8	7	4	4	2	17	0	0	3	6	1	1	0	2	4	1	3	8	13	0	2	1	8	2	1	3	5	2
296094	5	8	6	4	16	33	0	11	18	29	0	2	2	3	19	14	20	4	9	22	30	3	19	22	19	9	24	9	7	12	18	18	19	0	28	13	15	13	12	12	12	32	32	27	20	10	4	14	29
359445	2	1	8	5	0	0	24	1	4	6	0	4	19	9	25	5	2	16	2	12	4	10	3	7	21	2	1	5	2	3	9	0	1	9	2	2	14	4	19	8	3	4	1	3	2	5	3	5	0
556422	0	1	1	0	0	1	0	6	0	0	8	3	4	7	2	6	1	7	1	0	0	1	2	0	5	1	0	3	0	0	0	0	0	4	0	4	1	0	0	8	0	0	3	0	0	0	0	0	0
299759	0	5	1	0	0	0	0	0	0	0	0	0	0	3	0	0	0	0	1	2	5	0	8	8	0	0	3	0	1	10	2	0	4	0	0	1	0	0	2	1	0	0	0	0	0	0	0	0	0
290957	0	1	4	2	0	0	35	8	10	0	17	20	0	11	11	10	3	5	0	1	19	12	0	17	0	23	3	7	6	13	0	0	0	3	5	2	2	2	10	16	0	0	5	0	5	1	5	0	1
New.ReferenceOTU2677	1	0	3	0	3	1	7	0	3	0	5	1	2	1	5	8	1	0	0	1	0	0	0	1	9	0	2	1	0	1	0	0	4	0	7	0	4	5	0	4	1	0	0	5	0	8	0	0	1
528752	14	6	4	4	18	9	20	5	1	3	5	0	1	1	2	2	1	1	5	2	3	1	8	5	2	4	8	10	2	5	11	0	7	2	3	4	15	7	2	0	9	4	1	2	9	3	11	15	3
4362724	0	3	0	0	0	5	14	1	4	0	4	2	2	5	2	0	5	0	1	4	8	0	2	6	1	3	3	0	5	3	0	2	1	5	2	6	1	2	4	2	0	0	0	5	8	0	0	0	0
New.ReferenceOTU1494	0	0	0	0	0	0	2	1	0	1	0	0	0	1	0	0	0	0	0	0	0	0	0	0	0	0	0	0	1	0	0	0	0	0	1	0	0	0	1	0	0	0	0	0	0	1	2	2	10
New.ReferenceOTU1129	0	0	0	0	0	0	9	0	0	4	6	0	1	3	0	0	0	2	3	0	1	4	3	1	3	0	0	0	0	0	1	0	0	1	0	0	5	0	1	1	0	0	0	0	4	0	1	0	0
635495	1	1	0	2	5	0	5	0	3	3	4	0	0	6	7	0	4	0	5	3	0	3	1	2	0	0	0	0	6	0	0	0	2	0	2	0	3	0	0	0	0	2	0	5	0	0	2	0	0
New.ReferenceOTU1152	0	0	4	0	6	7	4	0	0	0	0	0	0	0	3	0	10	0	4	0	0	10	2	9	2	0	4	4	0	1	15	4	4	0	0	4	2	5	1	0	8	7	6	0	1	4	6	13	5
1026524	12	0	3	0	0	2	1	0	0	4	0	1	0	1	1	0	1	0	2	0	6	8	3	0	0	0	0	5	1	0	1	1	2	4	0	2	3	0	0	0	4	0	0	2	0	0	0	0	0
204093	10	6	3	0	2	10	7	2	3	19	2	7	14	11	14	0	9	2	5	7	6	10	2	10	3	0	10	1	15	3	25	9	8	12	7	6	2	2	2	6	8	19	0	10	9	0	0	0	0
New.ReferenceOTU531	2	1	0	0	1	0	1	0	1	1	0	0	1	0	0	0	3	0	2	0	0	2	0	0	2	0	0	1	0	0	1	0	0	0	0	0	0	3	5	0	3	1	0	0	4	0	0	0	0
316925	4	0	4	5	4	8	3	1	3	2	0	0	2	1	3	1	11	0	3	0	0	1	0	1	2	1	0	2	5	1	2	4	7	0	1	0	2	3	6	1	7	19	0	5	0	0	0	2	0
408513	15	12	2	3	6	5	2	1	2	6	2	0	4	2	10	5	5	3	5	1	0	6	11	2	5	2	10	8	6	5	0	8	5	3	0	1	2	1	19	6	7	3	0	0	4	0	0	0	0
196191	0	0	0	0	0	0	0	0	0	0	0	0	0	0	0	0	0	0	0	0	0	0	0	0	0	0	0	0	0	0	0	0	0	0	0	0	0	0	0	0	0	0	9	0	0	8	10	13	4
New.ReferenceOTU1276	1	0	0	0	0	0	0	0	0	0	0	3	0	0	0	0	1	0	1	0	0	0	0	1	0	0	0	0	0	0	0	0	1	0	0	0	0	3	0	0	11	0	2	0	0	0	0	2	0
New.ReferenceOTU1968	0	3	0	2	0	0	1	0	0	0	0	0	0	0	0	1	4	0	2	0	2	2	11	0	2	2	3	1	0	1	0	0	0	0	2	0	0	0	0	2	0	0	0	0	4	1	0	1	3
308136	0	0	2	0	0	0	0	1	0	0	1	3	0	0	0	1	0	0	4	0	0	2	0	0	0	0	2	2	0	1	3	0	1	0	7	0	2	5	0	0	0	0	0	2	3	0	0	0	0
324326	0	0	0	0	0	0	0	1	0	0	0	0	0	0	0	0	0	0	0	0	0	0	0	0	0	7	0	0	0	0	0	0	0	0	0	0	0	0	0	0	2	0	2	0	0	0	1	3	7
569826	1	0	5	1	0	0	1	0	0	0	1	0	1	0	2	3	2	3	0	1	0	1	0	3	1	3	4	5	4	0	1	0	1	0	0	2	0	0	3	25	2	0	0	0	1	3	0	0	0
New.ReferenceOTU354	0	0	0	0	0	0	0	0	0	0	0	0	2	2	0	0	0	2	0	0	0	0	2	0	0	0	1	2	1	0	0	0	0	0	0	0	0	0	0	0	0	0	18	3	0	13	18	9	5
581265	1	6	5	11	12	23	26	5	16	11	25	11	6	41	11	4	10	34	6	2	5	42	13	10	12	16	2	19	11	6	30	8	12	15	7	11	4	7	7	12	3	18	0	19	14	0	0	0	0
270303	0	3	0	0	0	3	0	1	0	4	0	0	0	0	1	0	4	0	0	0	1	0	1	0	0	3	3	1	3	1	5	2	0	0	1	0	3	0	1	0	3	3	0	0	1	0	0	0	0
328905	3	0	0	0	3	1	0	1	0	1	0	0	0	0	1	0	0	0	0	3	0	1	3	0	0	0	0	0	0	0	0	0	3	1	2	0	5	0	1	0	1	0	0	3	0	0	0	0	0
New.ReferenceOTU2486	0	1	0	0	0	0	0	0	1	1	0	0	2	0	0	0	0	3	0	0	0	0	0	0	0	0	0	2	0	0	0	0	0	0	0	0	0	0	0	2	8	0	2	0	1	8	1	0	2
443620	0	0	0	0	0	0	2	1	1	0	0	6	0	0	0	0	0	0	0	0	0	5	1	5	0	0	0	0	2	1	0	0	0	15	4	0	1	0	0	4	1	0	0	0	0	0	3	0	0
278609	0	0	0	0	0	0	0	0	0	0	0	0	0	0	0	0	0	0	0	0	0	0	0	0	0	0	0	0	0	0	0	0	0	0	0	0	0	0	0	0	0	0	7	0	0	0	3	5	1
New.ReferenceOTU1546	0	13	4	0	0	0	29	2	24	1	11	13	3	12	7	13	23	27	0	0	11	0	6	2	10	5	4	2	3	39	7	6	31	32	1	4	13	1	1	1	2	21	2	25	5	0	2	0	0
366143	2	0	0	0	1	7	0	0	0	0	1	0	0	1	2	5	0	0	0	0	4	0	0	0	0	0	1	8	3	1	0	2	0	1	0	0	0	3	2	5	0	0	0	4	0	0	0	0	0
270059	3	0	3	0	4	5	0	0	2	3	0	1	0	0	1	0	2	0	0	0	4	0	0	0	2	0	0	3	1	0	1	8	1	0	0	0	0	1	2	4	3	0	0	6	0	0	0	0	0
New.ReferenceOTU2083	0	0	0	0	0	0	25	0	0	4	0	17	0	0	28	8	0	0	0	0	2	0	0	0	22	0	0	2	0	0	0	0	0	0	0	0	2	0	2	0	0	0	0	6	0	0	2	0	0
594119	3	0	11	5	7	11	3	3	9	13	8	6	3	0	5	0	5	3	4	11	2	7	14	7	9	0	1	4	11	2	12	3	2	10	11	9	6	5	6	18	12	17	2	9	9	1	2	4	0
New.ReferenceOTU1190	9	60	67	119	22	51	54	39	77	51	79	52	12	46	85	89	31	39	57	58	118	42	91	13	53	27	71	78	65	62	49	86	53	22	83	34	85	88	47	85	0	87	27	119	29	44	78	61	48
296941	6	0	0	0	1	2	1	0	0	0	11	0	2	2	0	0	1	0	3	0	2	1	4	4	1	0	0	4	4	0	11	0	0	0	0	1	0	0	2	0	5	6	0	0	1	5	0	11	0
New.ReferenceOTU2582	5	11	0	0	4	0	0	0	0	0	0	0	0	0	0	4	2	0	0	2	0	0	0	0	0	1	2	2	0	0	0	0	0	0	0	0	0	0	7	0	2	0	0	0	1	0	0	4	5
364085	0	17	0	0	56	0	3	3	0	0	0	0	0	1	0	6	1	0	0	0	0	0	0	0	0	1	0	3	3	0	0	1	0	0	0	2	0	0	0	1	0	0	0	2	0	3	1	2	1
530061	2	17	3	1	29	3	1	6	0	3	0	0	0	0	0	3	2	2	3	0	0	1	2	1	0	1	0	13	0	0	4	4	4	0	2	5	0	0	0	1	8	1	0	0	1	4	4	2	7
529116	0	0	0	0	0	0	0	0	0	0	0	0	0	0	0	0	0	0	0	0	0	0	0	0	0	0	0	0	0	0	0	0	0	0	0	0	0	0	0	0	0	0	4	0	0	33	3	18	3
555562	5	4	3	0	22	9	0	5	0	4	4	0	0	2	9	3	10	6	1	0	4	0	9	7	3	24	10	6	1	6	12	46	13	0	3	15	6	6	6	6	7	5	0	3	16	1	0	1	0
514242	0	0	0	0	2	0	0	0	0	0	0	0	0	0	0	0	0	0	0	0	0	0	0	0	0	0	0	0	0	0	0	0	0	0	0	0	0	0	0	0	0	0	1	0	0	6	0	3	6
541328	1	9	2	0	5	0	0	1	3	9	0	0	0	1	1	1	2	1	0	0	0	0	2	1	0	0	0	4	0	0	0	0	0	0	3	1	0	0	6	1	13	0	0	0	1	3	0	0	0
582691	0	5	3	0	1	2	3	0	3	0	0	0	0	0	13	0	0	1	0	2	0	0	0	0	5	8	0	3	1	2	0	1	0	0	0	0	3	0	3	0	6	0	3	2	0	9	4	2	3
359750	0	0	0	0	0	0	0	0	0	0	0	0	0	0	0	0	0	0	0	0	0	0	0	0	0	0	0	0	0	0	0	0	0	0	0	0	0	0	0	0	1	0	1	0	0	6	4	1	3
828483	0	3	0	0	0	5	0	0	0	0	0	0	0	2	0	0	3	0	2	0	0	0	1	1	2	2	0	0	3	3	1	1	0	0	0	3	0	0	1	2	14	0	0	0	1	0	0	0	0
1625448	0	5	0	5	0	0	1	0	0	0	9	0	38	51	3	0	2	98	49	0	1	27	1	4	0	1	0	3	0	0	1	0	4	28	4	0	7	0	1	2	0	0	0	0	3	0	0	0	0
843459	6	26	6	8	13	37	21	17	25	10	10	13	3	36	4	19	39	33	17	3	1	18	10	12	9	16	11	6	34	4	9	27	14	7	4	20	8	20	7	16	22	9	1	4	14	12	0	1	2
582630	0	3	0	0	4	7	3	2	5	1	3	0	1	4	1	10	1	0	6	0	1	4	8	5	7	10	4	2	11	1	3	12	4	0	0	6	3	0	7	7	7	1	0	2	7	0	0	1	0
780650	0	0	1	1	0	0	2	0	0	0	0	0	0	0	0	0	0	0	1	0	0	0	1	0	0	2	0	0	0	0	0	0	0	0	0	2	0	0	0	1	0	0	18	0	0	85	13	50	12
268733	0	0	0	0	0	0	0	0	0	0	0	0	0	0	0	0	0	0	0	0	0	0	0	0	0	0	0	0	0	0	0	0	0	0	0	0	0	0	0	0	0	0	11	0	0	65	7	32	7
337379	19	28	32	19	9	18	32	11	15	9	33	24	14	30	10	35	37	52	20	18	10	13	17	23	8	30	17	9	8	6	5	38	5	23	6	24	14	12	24	22	63	18	0	13	25	2	0	0	0
341263	1	2	5	6	1	1	0	3	8	2	3	1	3	0	8	3	1	3	11	1	2	3	7	0	15	6	6	9	4	7	7	8	5	0	3	0	3	1	5	22	0	8	2	7	8	9	0	22	4
New.ReferenceOTU1030	0	0	1	0	0	0	1	0	1	3	0	0	3	0	1	0	1	0	0	0	0	0	0	1	1	1	2	2	0	3	0	1	0	0	0	0	0	2	1	0	0	0	0	0	1	0	0	0	1
New.ReferenceOTU2244	0	0	0	2	1	0	0	4	6	2	0	0	0	0	0	6	3	0	1	1	0	0	3	0	0	2	0	3	0	0	0	2	3	2	0	1	0	7	0	2	0	0	0	1	1	4	1	2	1
36705	0	3	0	0	5	4	0	2	0	9	1	0	0	2	2	4	0	0	1	0	0	0	3	1	2	3	1	11	0	3	2	6	0	0	3	1	0	9	0	3	0	0	0	0	0	3	1	0	2
98939	0	0	0	0	0	0	1	4	0	2	0	47	0	1	0	2	0	0	0	0	1	0	1	2	1	0	0	0	1	4	0	0	0	0	1	0	0	3	2	0	13	1	3	3	0	0	0	0	6
New.ReferenceOTU1202	1	1	0	0	0	0	0	3	1	1	0	1	0	0	2	0	2	0	0	0	1	0	0	0	2	0	4	3	0	0	0	1	2	2	5	0	1	1	0	0	0	1	0	0	0	0	0	0	0
1105343	0	1	1	0	0	5	0	0	7	4	0	1	0	0	0	0	6	0	0	0	3	0	6	1	2	2	0	0	2	1	6	1	4	0	0	2	0	4	4	0	0	0	0	2	0	0	0	0	0
42636	0	3	4	0	0	2	0	0	0	0	0	0	0	0	2	1	5	0	0	0	0	0	0	0	1	0	0	0	0	0	0	4	1	0	2	0	0	3	4	0	0	0	0	2	0	1	0	0	0
New.ReferenceOTU224	0	0	0	5	0	0	0	1	0	0	0	0	0	0	0	1	0	0	0	0	4	0	0	0	0	0	0	0	9	0	0	0	0	0	0	5	1	3	0	2	0	0	0	0	3	0	0	13	1
292585	2	0	3	0	0	0	0	1	1	2	1	0	3	0	3	2	0	0	0	0	1	0	5	0	0	1	0	8	0	0	3	0	1	0	0	0	0	6	0	0	0	0	0	0	3	0	0	0	0
306041	0	0	1	0	1	1	8	0	0	0	0	0	1	0	17	2	0	3	0	0	1	0	0	7	17	5	2	10	0	0	8	1	2	0	1	2	2	0	0	0	9	0	0	2	6	0	0	0	0
198826	0	4	0	0	0	0	0	0	1	1	0	4	0	0	0	0	3	2	2	0	2	2	0	0	0	1	2	0	0	2	1	0	0	0	12	0	0	3	0	1	0	8	0	8	12	0	0	0	0
114400	0	0	0	0	0	2	0	0	0	0	0	0	0	0	0	0	0	0	0	0	2	1	0	0	0	0	2	6	0	0	6	1	6	0	19	2	1	5	1	2	2	0	0	1	0	1	1	5	0
New.ReferenceOTU157	0	4	8	5	0	8	9	0	3	2	0	0	0	2	1	3	0	0	3	0	0	1	11	0	0	0	0	1	2	12	2	1	3	2	2	0	0	8	1	5	0	0	4	1	7	4	4	1	2
294747	4	13	3	4	0	0	0	2	0	0	0	0	0	3	0	0	0	0	8	0	2	1	0	0	0	0	0	4	11	2	1	2	0	2	0	0	0	0	0	1	1	3	4	0	0	4	0	1	4
196494	2	0	2	4	0	0	0	0	0	1	0	0	0	0	0	1	0	0	0	0	0	0	0	0	0	0	1	3	2	4	16	2	2	0	0	3	0	0	0	5	0	5	0	2	1	0	0	0	0
326543	3	0	0	0	1	0	0	4	0	3	0	0	0	0	0	1	0	1	2	0	0	0	1	0	1	7	1	3	0	2	0	2	2	0	1	0	2	0	0	0	2	0	1	0	2	0	0	7	1
287544	3	4	0	3	4	2	4	0	0	1	0	5	3	2	0	0	3	0	0	8	0	5	4	3	3	6	4	9	4	1	0	2	4	2	0	0	0	3	1	2	0	0	2	2	0	0	1	0	0
354275	0	4	0	0	1	4	0	0	6	0	0	0	0	2	0	0	2	0	0	0	0	0	0	0	0	0	6	7	3	1	0	0	0	0	1	2	0	2	1	5	0	0	1	0	0	1	1	13	9
4315785	2	0	1	0	0	5	0	0	1	6	0	1	0	0	1	2	0	4	11	0	0	1	0	0	1	0	0	0	4	4	0	0	0	2	1	0	0	4	0	2	4	9	2	3	0	5	0	1	0
4303856	0	2	0	0	0	0	0	0	3	0	0	0	1	0	0	1	0	0	1	0	4	0	0	0	2	0	0	1	1	3	1	0	0	0	3	0	5	2	0	4	0	2	3	1	0	2	1	6	2
617806	3	0	0	0	7	2	2	4	1	0	0	0	0	1	1	0	0	0	0	0	1	2	0	0	2	0	0	0	0	0	6	0	1	0	0	0	0	0	3	0	0	0	0	7	1	3	6	4	2
New.ReferenceOTU2699	0	0	4	0	0	0	0	7	0	5	0	0	0	0	0	0	0	0	0	1	3	0	1	0	0	2	0	1	0	5	2	0	0	0	0	0	0	4	0	1	0	0	0	0	0	0	8	0	1
New.ReferenceOTU663	0	2	7	3	6	4	8	0	0	0	0	0	0	0	1	0	0	4	2	0	0	0	0	3	0	0	2	2	1	0	0	0	3	0	0	2	0	6	1	1	18	0	0	0	0	1	0	2	0
291272	4	0	2	1	0	0	0	0	0	5	3	0	0	0	0	6	1	0	0	0	7	0	1	6	0	2	0	0	2	0	0	1	1	0	2	0	0	0	1	1	0	6	1	0	0	0	0	0	7
New.CleanUp.ReferenceOTU9995	0	2	0	0	0	0	0	0	0	0	1	0	0	0	5	0	0	0	0	0	0	0	0	0	0	0	0	0	0	0	0	0	0	0	21	0	0	0	0	6	0	0	0	0	0	0	3	0	0
311390	0	4	0	0	6	1	0	0	0	0	1	0	0	0	0	0	0	2	0	0	1	12	0	0	0	8	0	6	0	0	3	0	2	1	0	0	0	0	0	0	0	0	2	0	2	19	1	4	4
357765	0	0	2	5	0	7	11	3	1	3	5	1	10	2	0	4	3	5	3	0	0	4	1	2	5	4	1	3	2	3	2	0	0	0	0	0	0	0	0	0	0	0	0	0	0	0	0	0	0
591540	0	2	3	0	3	0	0	1	1	0	0	0	0	3	0	2	0	0	0	0	2	0	0	1	3	0	2	3	1	0	0	3	0	0	0	0	0	0	0	1	0	0	1	0	2	5	0	6	2
354622	0	0	0	0	0	0	0	2	0	0	0	0	0	2	0	0	0	0	0	0	0	0	1	0	0	0	0	0	0	0	0	0	0	0	0	0	0	0	0	0	0	0	3	0	0	24	5	14	1
4329776	0	1	0	3	0	2	0	1	0	0	0	3	0	0	1	6	3	2	0	0	0	0	0	3	0	4	1	0	4	2	0	7	0	1	2	4	3	0	0	7	0	2	0	0	4	0	0	0	0
4387706	1	0	0	0	2	2	18	3	0	5	11	1	5	29	0	0	0	13	0	0	1	7	1	4	0	0	0	0	2	2	0	0	0	2	1	4	0	0	0	4	0	4	0	0	0	0	0	0	0
New.ReferenceOTU232	3	1	0	0	6	1	0	0	0	0	3	0	2	0	0	0	0	0	3	5	1	0	3	0	3	0	1	0	3	0	3	4	0	0	3	0	1	5	0	0	2	4	0	1	2	0	0	0	0
291493	6	3	0	3	0	15	43	0	0	11	7	39	15	3	0	0	0	11	3	4	6	8	7	27	0	7	0	0	0	0	0	1	15	21	5	12	0	0	0	3	3	13	4	0	2	0	0	5	0
New.CleanUp.ReferenceOTU4676	1	3	0	0	0	0	0	2	2	0	3	0	0	2	0	5	0	0	0	0	0	0	3	0	0	22	0	14	0	0	0	6	0	0	1	1	7	0	3	5	0	0	0	0	5	0	0	7	0
New.ReferenceOTU1620	0	3	3	0	6	0	0	1	0	0	0	0	0	4	3	3	0	1	0	0	2	0	5	7	6	0	10	1	23	6	5	1	0	1	0	0	0	0	5	1	13	2	11	6	0	6	0	10	4
New.ReferenceOTU905	3	0	0	1	3	0	0	2	1	1	1	0	0	0	0	0	0	1	0	4	0	1	0	1	2	0	0	2	0	2	0	0	1	0	0	1	0	0	2	0	1	0	1	0	0	13	3	2	11
739387	6	6	1	7	18	5	0	4	4	12	0	0	0	2	0	1	0	2	1	4	7	7	0	4	3	1	0	1	0	0	8	0	8	3	1	1	1	3	7	0	13	6	0	3	2	0	0	0	0
New.CleanUp.ReferenceOTU19258	6	6	1	0	2	9	0	8	5	1	2	0	0	2	0	2	3	2	0	5	0	1	0	0	5	8	0	1	2	7	0	16	6	0	6	6	1	11	3	1	0	0	0	1	8	0	0	0	0
306866	1	5	0	6	1	1	3	0	4	5	0	0	4	1	3	0	1	1	0	1	1	0	3	0	1	0	0	1	0	10	4	4	6	0	0	0	0	4	0	2	3	8	0	5	2	0	0	0	0
New.ReferenceOTU1854	0	2	0	0	0	0	0	0	10	1	0	0	0	0	0	0	6	4	0	1	0	0	0	0	0	1	0	0	0	0	5	9	2	0	0	0	0	3	0	0	0	1	0	0	0	0	3	2	1
New.ReferenceOTU2593	0	1	1	0	1	3	0	0	6	3	0	0	0	0	0	0	2	0	0	0	3	0	1	1	0	1	0	3	0	0	3	1	3	0	1	5	0	3	0	0	2	0	0	0	0	0	0	0	0
New.ReferenceOTU1983	0	0	0	0	0	0	0	0	1	0	0	0	0	0	0	0	0	0	0	0	0	0	0	0	0	0	0	0	0	0	0	0	0	0	0	2	0	0	0	0	2	0	14	0	0	10	3	37	20
New.CleanUp.ReferenceOTU26749	29	33	7	5	33	15	1	6	50	16	1	1	0	5	1	1	39	10	9	9	2	3	14	4	4	23	9	1	2	12	23	32	21	2	11	26	7	32	22	0	68	8	0	22	41	1	2	1	0
528692	49	28	4	0	29	23	1	18	29	18	0	1	1	0	1	7	19	3	10	3	3	4	12	4	1	20	2	4	0	28	20	23	13	0	8	26	10	18	3	0	142	5	0	2	28	0	0	0	0
22371	3	3	0	0	0	0	0	0	0	3	0	0	0	1	0	0	0	0	0	0	0	0	3	0	0	0	0	0	0	0	2	3	0	0	0	0	0	2	0	0	0	2	4	1	0	9	16	29	3
New.ReferenceOTU169	3	1	0	0	0	0	0	0	0	0	0	0	0	0	0	0	2	0	0	0	0	0	0	0	0	0	0	0	0	0	0	0	0	0	0	2	0	0	0	0	1	0	2	2	1	16	20	26	9
New.ReferenceOTU581	10	13	2	3	7	18	4	1	14	6	0	9	0	3	2	25	17	1	0	2	1	0	2	1	0	9	8	3	0	6	0	4	0	0	2	7	17	7	6	1	0	0	4	7	2	0	10	12	0
New.ReferenceOTU1590	6	0	0	6	0	3	1	0	0	0	0	4	5	0	0	1	0	0	0	0	6	0	2	7	0	0	10	6	12	0	0	0	0	8	3	3	0	2	3	4	12	2	20	0	0	10	0	0	12
562038	1	33	17	4	54	104	20	32	20	46	27	0	0	9	19	55	122	7	18	0	27	15	40	46	33	49	37	75	17	49	141	88	73	7	29	41	34	21	38	9	186	4	7	24	140	7	19	14	24
701221	5	0	0	0	1	3	0	0	2	0	0	0	0	0	1	3	0	0	0	0	3	0	0	2	0	0	3	0	0	2	6	4	0	0	3	0	0	0	1	0	7	0	77	3	4	34	24	77	84
708680	43	4	0	0	10	0	0	4	0	3	0	0	1	2	1	4	1	1	6	0	0	1	4	6	0	0	1	5	0	0	10	2	0	0	0	2	1	2	4	1	47	0	3	2	6	31	10	45	10
300235	114	0	0	0	0	0	2	0	0	1	0	2	0	1	0	0	0	0	0	1	0	3	0	13	0	0	0	0	0	0	0	0	0	0	0	1	0	0	0	0	0	2	0	0	0	0	0	0	0
589852	42	22	4	5	21	18	10	4	17	12	2	2	2	5	3	11	9	4	4	1	3	5	9	9	6	6	7	16	1	8	7	11	2	1	10	22	4	7	4	3	9	15	2	6	36	0	4	4	0
571178	24	10	4	4	33	9	0	1	9	5	7	0	0	6	3	22	9	14	0	0	4	0	10	16	0	11	3	24	3	7	1	8	2	2	9	14	5	8	5	1	29	1	2	2	35	25	10	36	10
541602	0	0	0	0	0	0	1	0	0	0	0	0	0	0	0	0	0	0	0	0	0	0	0	0	1	0	0	1	0	0	0	0	0	0	0	0	0	0	2	0	0	0	3	2	0	1	1	6	11
532771	9	9	4	4	30	4	10	2	1	7	9	3	0	37	0	15	10	17	12	7	3	5	1	11	3	16	8	5	5	7	8	7	6	6	11	14	4	3	2	1	20	4	0	1	17	0	0	0	0
522107	10	5	4	10	15	7	12	16	11	3	11	3	0	32	1	12	7	19	7	3	11	2	2	31	1	17	12	3	0	6	22	16	6	4	4	12	7	0	3	0	20	1	0	1	20	0	0	0	0
293918	0	2	0	0	2	3	2	0	3	0	0	0	0	4	6	0	0	1	0	2	0	0	0	0	0	0	2	0	0	0	0	0	3	0	0	0	2	0	1	0	5	0	0	0	0	5	0	5	1
524575	13	1	3	3	7	5	0	2	0	0	2	2	0	2	0	0	0	1	4	0	3	0	3	2	1	0	2	10	0	1	3	0	0	0	4	6	0	2	1	0	6	8	0	2	3	0	0	0	0
537886	0	3	0	0	0	9	6	2	0	6	0	0	0	1	0	0	5	0	11	0	4	0	3	3	2	6	3	0	0	2	1	3	1	0	2	0	0	0	1	2	0	0	2	0	0	0	3	0	0
New.ReferenceOTU560	0	3	0	4	4	0	0	0	11	1	0	0	0	0	3	0	2	0	9	0	0	11	0	0	2	0	0	0	0	0	0	1	0	0	4	0	13	13	0	0	0	0	0	3	0	0	0	1	2
1105552	8	1	1	1	1	5	9	0	0	8	9	3	27	13	10	4	1	9	3	0	7	4	8	4	0	0	2	0	1	2	2	1	0	6	0	0	2	6	0	8	5	0	0	5	1	0	0	0	0
909065	6	0	8	8	3	1	16	0	3	2	3	0	32	12	1	0	0	12	4	4	5	0	2	3	1	0	0	0	1	2	0	1	0	2	0	0	0	0	0	4	7	1	0	2	6	0	1	0	2
591671	3	0	0	0	0	0	0	0	0	0	1	0	2	1	0	0	0	0	0	0	0	1	0	0	0	0	0	2	0	0	1	0	0	0	0	0	0	0	1	0	0	0	5	1	1	28	13	0	14
253380	0	4	0	0	0	0	5	2	0	3	7	3	6	10	0	0	2	31	5	0	0	5	0	0	2	2	0	1	0	1	32	4	8	1	1	1	0	0	3	0	3	6	0	0	6	0	0	0	0
523542	3	1	6	15	0	0	5	8	0	2	9	1	14	84	3	19	0	10	9	2	14	8	2	8	2	10	27	12	8	2	4	2	0	4	0	5	1	3	3	2	3	0	0	9	5	1	0	0	0
New.ReferenceOTU320	27	8	1	1	39	6	3	1	3	2	1	0	0	6	2	17	16	0	1	0	1	0	1	1	0	0	2	15	7	13	0	10	1	0	3	1	6	0	10	0	7	0	4	3	41	2	0	0	11
369027	2	0	2	0	3	1	14	3	0	0	0	1	2	1	3	2	4	21	1	16	0	0	3	26	1	0	0	0	0	0	5	0	0	0	2	3	0	0	0	2	6	3	0	0	1	2	0	0	2
985239	0	0	2	5	1	0	0	0	1	1	0	0	1	0	11	1	0	0	4	4	0	1	0	0	2	0	2	1	1	0	0	1	0	0	0	0	0	0	1	2	4	0	1	1	0	6	1	0	0
197765	0	2	7	4	0	0	0	2	0	0	5	0	0	14	1	8	0	4	0	2	1	8	0	0	0	0	1	0	0	1	0	5	0	0	10	0	1	1	3	0	0	0	0	0	2	0	0	0	0
335311	0	2	0	3	2	0	3	3	0	0	2	0	0	10	1	3	0	2	1	0	0	3	0	0	0	2	1	2	5	1	0	2	1	1	0	1	0	0	0	4	0	0	0	0	5	0	0	0	0
New.ReferenceOTU895	0	0	2	0	0	0	1	0	0	0	0	0	0	7	0	0	0	0	0	0	0	0	0	0	0	0	0	0	0	0	0	0	0	0	0	0	0	0	0	0	0	0	0	0	0	50	0	5	4
593369	0	5	1	1	1	0	7	0	1	0	1	0	3	4	0	2	1	8	0	0	0	3	0	1	0	0	0	0	0	0	0	2	1	0	0	1	2	0	0	0	0	1	0	1	2	5	0	0	0
New.ReferenceOTU643	0	0	0	0	0	0	0	4	0	0	1	0	2	5	0	0	0	6	3	0	0	3	0	0	0	2	1	3	2	0	0	0	1	0	0	0	0	0	2	0	0	1	2	0	0	68	7	6	0
265563	0	0	8	3	7	3	2	1	2	0	9	0	12	7	1	4	3	25	6	0	4	12	8	10	1	5	2	6	8	1	5	1	5	4	4	3	3	3	2	12	11	3	0	2	5	0	0	0	0
34413	0	4	5	2	3	2	4	0	3	0	3	1	3	3	7	2	2	2	2	2	6	0	3	2	1	4	5	0	1	2	1	3	3	3	3	4	2	4	0	6	5	8	0	2	2	0	0	0	0
4368944	1	0	0	1	1	0	4	0	0	0	6	1	11	12	0	0	0	6	5	0	0	0	0	0	6	0	1	0	5	0	2	0	0	0	0	0	0	2	0	1	0	1	0	0	0	0	0	0	1
903975	0	0	0	4	1	0	2	0	1	0	1	0	3	44	26	3	5	0	3	0	7	17	4	1	1	4	9	3	0	4	0	0	0	4	0	2	15	2	0	5	0	1	0	2	0	0	0	0	0
983033	4	1	4	7	0	0	0	0	0	5	2	0	0	0	0	0	0	0	0	0	0	5	0	0	1	0	1	1	1	0	4	0	0	0	0	0	0	0	1	0	0	0	0	3	0	5	0	0	0
295410	1	0	0	0	1	1	1	0	0	3	0	0	0	4	0	0	0	0	3	0	3	0	0	0	1	1	0	0	1	0	9	0	0	0	0	0	0	0	2	0	4	0	1	2	2	0	0	0	0
335527	5	10	1	1	4	2	4	3	6	11	9	2	2	0	14	2	3	3	11	0	8	15	6	0	13	4	6	11	5	2	13	2	2	0	5	11	2	5	14	17	0	0	0	2	5	0	1	0	0
New.ReferenceOTU2376	0	3	0	0	0	2	3	0	0	1	0	0	1	5	1	0	0	1	3	0	0	2	12	2	7	4	0	0	0	0	0	1	0	0	0	0	2	3	0	0	0	0	0	0	0	0	0	2	0
304154	1	0	4	3	11	4	0	0	0	0	0	10	0	0	3	0	1	3	2	0	1	0	4	0	3	1	0	0	5	2	4	5	2	0	7	5	0	2	0	6	0	4	0	4	1	0	0	0	0
34020	17	39	39	22	7	42	39	10	14	55	72	135	0	60	8	62	6	28	59	7	18	11	23	10	5	21	28	4	20	21	16	40	22	63	47	19	3	20	3	17	18	78	0	54	7	1	1	0	3
New.ReferenceOTU172	3	2	0	0	0	1	0	0	0	0	0	3	0	3	0	3	0	5	2	0	0	0	0	1	0	0	5	0	1	0	0	0	0	2	2	0	0	2	0	0	0	1	15	3	1	31	24	12	40
720973	0	0	0	0	0	0	0	0	0	0	0	0	0	0	0	0	0	0	0	0	0	0	0	0	0	0	0	0	0	0	0	0	0	0	0	1	0	0	0	0	0	0	0	4	0	1	0	0	0
New.ReferenceOTU1416	0	2	1	2	3	0	0	7	2	0	0	0	1	9	0	6	4	0	0	4	1	0	3	0	0	0	0	0	5	0	1	1	0	1	0	0	2	0	1	0	0	4	3	5	3	17	13	8	9
355697	83	258	79	282	139	194	194	140	226	213	172	127	171	164	280	118	190	207	286	680	369	231	193	161	330	122	133	92	369	326	219	181	129	203	229	138	146	295	156	393	3	349	120	479	195	264	227	250	188
346525	0	0	0	0	0	0	1	0	0	0	0	0	0	0	2	0	0	0	0	0	2	0	1	0	0	0	0	0	1	0	0	0	0	0	0	0	0	0	2	4	0	1	1	0	0	6	1	1	1
New.ReferenceOTU1698	2	4	0	3	0	0	0	1	0	0	1	0	0	0	0	1	0	0	2	7	0	0	2	0	0	0	0	0	0	0	3	1	0	1	1	1	1	2	0	0	0	3	0	3	2	5	0	1	0
New.ReferenceOTU166	5	15	0	7	3	3	0	0	2	2	5	0	4	2	1	1	2	1	9	15	4	4	0	0	1	2	0	1	8	2	6	2	5	0	10	2	0	4	1	5	0	7	2	2	6	0	1	3	0
New.ReferenceOTU243	0	4	0	0	0	0	0	0	0	4	5	0	0	0	3	0	0	0	6	0	0	0	3	0	3	0	0	0	0	0	0	1	0	0	1	0	8	0	0	0	0	0	0	4	0	0	0	0	0
336149	0	3	0	0	0	0	0	0	1	0	0	0	0	0	0	0	0	0	0	0	0	0	0	0	0	0	0	5	0	0	0	5	0	0	0	0	5	0	0	0	0	0	0	0	0	0	0	0	0
New.ReferenceOTU2383	1	0	0	0	3	1	0	0	0	0	0	0	2	0	0	0	1	0	0	0	2	0	1	3	0	0	0	0	0	0	6	2	1	0	0	0	0	2	0	0	12	2	0	0	0	0	0	3	3
300123	4	1	2	0	2	3	0	6	0	1	0	0	0	0	2	1	4	0	2	0	1	0	3	2	0	2	0	0	2	1	2	7	0	0	0	0	0	6	0	4	17	0	0	0	11	0	0	0	0
New.ReferenceOTU502	0	6	1	0	0	1	0	0	4	0	0	0	0	0	3	1	1	0	0	0	0	0	0	0	0	4	0	0	1	0	0	4	0	0	1	6	2	1	1	0	0	0	6	0	3	13	14	17	15
307722	1	6	3	4	2	0	2	2	11	0	6	0	0	5	0	9	0	0	14	0	8	3	1	0	0	12	8	1	0	0	2	1	0	0	11	2	1	0	7	0	0	0	78	0	10	13	1	0	33
New.ReferenceOTU773	0	0	0	0	0	4	0	0	2	0	0	0	0	0	1	2	0	0	1	2	0	0	1	3	0	0	1	2	0	8	6	6	17	0	0	0	1	2	0	0	0	0	4	0	0	26	22	8	19
341204	6	5	7	1	0	12	0	4	6	2	0	3	0	2	0	0	3	3	1	0	10	0	0	4	0	8	3	2	0	29	14	5	46	0	4	5	0	12	4	1	0	4	0	0	6	0	0	0	0
352507	0	1	0	1	1	8	0	3	0	8	0	0	0	0	0	7	9	0	1	0	0	0	3	0	1	4	1	0	1	2	0	2	6	0	0	12	0	4	0	2	0	2	0	1	8	0	0	0	0
333259	1	12	4	0	2	5	0	0	0	2	0	0	0	0	1	1	2	1	1	0	0	0	3	0	0	8	2	2	0	0	3	1	4	0	0	18	2	0	1	3	0	0	0	4	4	0	0	0	0
New.ReferenceOTU1727	0	4	4	0	1	0	0	13	0	4	0	0	0	2	1	1	0	1	0	0	0	0	0	0	4	2	0	0	1	5	0	4	0	0	3	0	0	6	2	5	0	0	2	7	1	0	1	0	3
New.ReferenceOTU664	3	0	0	0	0	0	1	2	0	0	0	0	9	1	1	1	5	7	4	0	3	0	3	2	0	0	2	0	0	0	0	0	2	0	0	0	0	0	0	2	2	0	0	0	0	0	0	0	0
581003	2	0	0	0	0	6	0	0	0	0	0	1	10	0	0	0	0	1	0	0	6	0	0	6	0	0	0	0	0	0	0	0	0	0	0	8	0	0	0	0	0	0	0	0	0	0	0	0	0
1029949	14	3	8	2	0	5	15	8	40	16	22	4	10	25	3	3	10	11	24	0	5	5	12	12	11	9	5	5	0	12	4	7	13	4	12	8	10	15	2	0	0	17	2	5	16	0	1	15	0
309433	4	3	0	1	2	0	11	7	0	4	3	0	0	0	0	0	0	4	0	0	1	0	1	5	0	3	0	0	0	0	2	3	0	0	2	4	0	0	0	2	3	0	0	0	8	0	0	0	0
370098	3	0	2	0	2	1	0	0	0	0	1	1	1	1	0	1	0	2	4	0	0	0	2	0	0	0	1	0	0	6	2	2	1	0	0	4	0	1	0	4	2	2	0	0	3	0	0	0	0
New.ReferenceOTU1496	7	0	0	0	0	0	0	0	0	0	0	0	0	0	0	0	6	0	0	0	0	0	1	0	0	2	0	0	0	0	0	7	2	0	0	6	0	0	0	0	9	0	0	0	0	0	0	0	0
New.ReferenceOTU1758	2	2	0	0	0	6	0	0	0	0	0	0	0	0	0	1	9	0	0	0	0	0	3	0	0	1	0	0	3	5	2	1	0	0	1	0	2	2	1	2	1	0	0	0	0	0	0	0	0
540532	0	0	1	0	0	0	0	1	0	0	0	0	0	8	0	0	0	0	2	0	0	0	2	0	0	11	5	4	3	1	0	2	0	0	0	1	0	3	0	0	0	0	6	0	1	1	1	7	1
New.ReferenceOTU411	0	0	2	0	0	0	0	2	3	0	0	0	5	1	5	1	0	3	0	0	5	3	1	0	5	2	1	6	11	6	2	0	0	0	2	0	0	2	1	0	0	4	0	0	3	13	0	0	7
349036	1	4	2	1	6	11	3	6	0	2	18	4	3	0	1	1	10	30	3	1	0	0	5	1	13	2	0	6	0	0	0	10	2	1	2	33	0	6	0	0	4	0	0	1	9	0	0	3	0
565357	4	3	1	0	13	0	0	0	2	6	0	0	0	2	0	1	4	0	0	1	0	0	6	0	0	2	0	2	0	1	0	3	0	0	1	0	1	0	2	0	7	0	1	0	5	4	0	1	1
588414	0	20	3	1	10	2	23	9	15	1	15	0	0	8	4	14	11	1	19	0	3	3	2	0	12	8	14	2	3	11	0	6	0	0	3	2	9	8	0	5	0	2	0	11	14	0	0	0	0
New.ReferenceOTU1804	0	0	0	0	0	1	0	2	1	0	0	0	0	0	1	7	0	0	3	0	0	0	3	0	0	0	0	0	0	1	0	4	0	0	1	0	2	0	1	0	0	0	2	4	0	1	5	18	4
561193	0	0	0	0	0	1	0	0	1	1	0	0	0	0	0	0	1	0	0	0	1	0	3	0	0	7	0	2	0	0	0	1	0	0	1	3	0	0	1	0	7	0	0	0	3	0	0	0	0
976470	1	1	1	0	1	2	0	3	0	3	0	0	0	0	0	1	0	0	0	0	0	1	1	0	0	0	0	0	0	1	1	0	0	0	0	2	0	0	0	0	4	3	0	2	1	0	0	0	0
New.ReferenceOTU379	0	1	0	0	1	0	0	0	0	0	0	0	0	0	0	0	0	0	1	0	0	0	2	0	0	1	7	0	3	0	4	0	1	0	0	4	0	1	1	0	12	1	0	0	4	0	0	0	0
838200	0	4	0	0	2	10	1	0	0	2	0	1	0	0	6	6	1	0	3	0	0	0	1	0	7	2	0	0	1	0	1	2	0	0	3	4	0	3	0	0	1	0	0	1	2	2	0	0	0
New.ReferenceOTU2302	0	0	0	0	2	0	0	4	0	2	0	0	0	0	6	3	1	1	11	0	2	0	0	0	4	5	0	2	0	5	2	3	3	0	2	0	0	0	0	0	0	1	0	4	5	0	2	4	4
New.ReferenceOTU1773	0	4	2	0	1	1	1	0	1	3	0	0	0	0	10	0	0	0	2	0	0	0	1	0	9	0	0	0	0	5	0	0	0	0	0	2	2	2	0	0	0	0	0	0	2	0	0	0	0
328825	0	19	7	3	17	13	2	14	3	18	2	0	0	0	1	7	16	0	3	3	3	3	9	3	2	18	13	8	6	13	29	18	5	2	6	2	3	14	15	1	63	4	0	2	10	0	0	2	1
349458	0	0	0	0	0	0	0	0	0	0	0	0	0	0	0	0	0	0	0	0	0	0	0	0	0	0	0	0	0	0	0	0	0	0	0	2	0	0	0	0	0	1	19	0	0	18	13	31	29
20799	0	0	0	0	0	0	0	0	0	0	0	0	0	0	0	0	0	0	0	0	0	0	0	0	0	0	0	0	0	0	0	0	0	0	0	0	0	0	0	0	0	0	0	0	0	8	1	11	3
335846	0	1	0	0	0	0	0	0	0	7	0	0	0	0	0	0	6	2	0	0	0	0	0	0	0	0	0	0	0	0	14	0	1	0	0	3	0	4	0	0	0	2	0	3	0	0	0	0	0
355175	0	0	0	0	2	1	0	0	0	2	0	0	0	0	0	0	0	0	0	0	0	0	1	2	2	1	0	0	0	3	21	7	0	0	0	5	0	3	0	0	0	1	0	2	0	0	0	0	0
353085	0	0	0	0	0	0	0	0	0	0	0	0	0	0	0	0	0	0	0	0	0	0	0	0	0	0	0	0	0	0	0	0	0	0	0	0	0	0	0	0	0	0	37	0	0	10	15	3	5
295854	0	0	0	0	0	0	0	0	0	0	0	0	0	0	0	0	0	0	0	0	0	0	0	0	0	0	0	0	0	0	0	0	0	0	0	0	0	0	0	0	0	0	33	0	0	11	11	4	9
New.ReferenceOTU1579	0	17	41	10	31	86	15	33	43	71	13	86	7	7	94	37	56	20	34	27	48	26	32	1	121	31	43	22	23	43	12	39	44	54	87	56	83	129	33	53	44	59	24	24	65	9	9	1	3
New.ReferenceOTU1775	0	23	3	9	0	3	0	17	22	23	0	21	0	1	39	10	1	1	32	1	4	0	32	0	44	2	5	1	24	5	0	4	0	0	19	10	24	0	10	29	0	2	12	11	0	13	2	7	4
331240	0	2	3	1	0	3	0	0	4	5	0	1	0	0	14	4	0	0	3	0	0	0	4	0	20	2	8	0	2	5	0	0	0	0	1	1	7	0	3	14	0	0	0	0	0	0	0	0	0
574689	5	0	0	0	0	0	0	1	3	1	1	0	4	5	0	0	0	1	0	0	3	1	0	2	1	4	3	0	0	3	7	0	0	0	0	4	0	0	0	2	1	0	0	0	4	0	0	0	1
759751	4	10	0	0	0	1	0	0	1	0	1	2	0	0	0	0	0	0	0	0	0	0	0	0	0	0	0	0	0	2	0	0	0	0	0	0	1	0	1	0	0	0	3	0	0	15	1	15	4
355630	5	6	2	0	2	4	3	0	2	1	10	0	0	3	0	0	3	0	0	0	5	1	12	5	1	3	3	3	3	1	9	5	7	0	0	10	0	1	2	2	2	3	0	2	3	0	0	0	0
4452051	0	0	0	0	0	0	13	0	0	1	42	0	0	34	0	0	0	0	0	0	0	0	0	0	0	0	0	0	0	0	0	0	0	9	0	0	0	0	0	0	0	0	0	0	0	0	0	0	0
293665	2	3	3	0	5	1	0	0	0	2	0	0	0	0	4	0	1	0	0	0	0	0	3	0	1	0	1	3	0	2	0	1	6	0	2	5	5	0	6	0	0	0	0	3	4	0	0	0	0
174153	0	0	0	0	0	0	0	0	0	0	0	0	0	0	0	0	0	0	0	0	0	0	0	0	0	1	0	0	0	0	0	0	0	0	0	0	0	0	0	1	0	0	3	0	0	7	4	12	1
516576	0	0	0	0	0	0	0	0	0	0	0	0	0	0	0	0	0	0	0	0	0	0	0	0	0	1	0	0	2	0	0	0	0	0	2	0	0	0	0	0	0	0	10	0	0	8	1	1	13
569210	0	0	1	0	1	1	0	7	0	0	0	0	0	6	1	6	0	4	0	0	1	1	0	0	0	6	5	6	7	0	0	3	0	1	0	4	0	2	6	2	0	0	0	0	0	0	0	0	0
523064	0	0	0	0	0	0	0	0	0	0	0	0	0	0	0	0	0	0	0	0	0	0	0	0	0	0	0	0	0	0	0	0	0	0	0	0	0	0	0	0	0	0	10	0	0	7	7	13	6
535601	11	25	6	3	9	10	9	7	13	8	1	4	3	17	7	7	17	3	2	2	6	4	28	25	3	29	6	14	4	6	12	5	10	0	1	25	0	13	5	8	17	17	1	5	11	0	0	0	1
20439	1	0	0	0	0	2	3	0	0	1	1	5	16	1	3	0	3	4	1	0	4	2	0	1	5	0	0	0	0	0	0	1	4	0	0	0	0	1	0	4	1	0	0	1	0	0	0	0	0
36330	7	2	0	0	4	0	18	3	5	1	18	0	46	20	9	4	2	30	23	3	6	12	0	0	2	0	6	5	1	0	3	0	0	1	4	0	10	0	0	4	6	0	3	2	5	11	1	3	6
New.ReferenceOTU1927	0	0	0	0	0	0	0	0	0	0	0	0	1	0	1	0	0	0	3	0	0	0	0	0	0	0	0	0	0	0	0	0	0	0	0	0	0	0	0	0	0	0	1	0	3	21	0	0	1
561171	7	0	0	0	0	2	5	0	1	0	6	6	22	2	0	2	0	9	0	1	2	6	0	10	0	2	0	0	2	0	0	0	0	5	0	2	0	1	0	1	0	1	1	0	0	1	0	0	0
875709	0	0	2	0	0	1	0	0	0	0	0	0	0	0	0	0	2	0	0	0	0	0	0	0	1	0	0	0	0	0	0	0	0	0	0	0	0	0	0	0	10	0	2	0	0	1	0	14	8
525378	0	1	0	0	0	0	7	0	0	0	10	0	7	11	0	0	1	5	1	0	2	0	0	0	0	1	0	0	2	4	2	6	5	1	4	0	0	3	0	5	4	0	0	0	0	0	0	2	0
370809	1	9	1	5	3	1	0	0	3	0	10	0	3	15	3	0	0	11	6	3	2	9	0	1	1	0	0	4	0	0	0	3	0	0	0	1	2	0	0	0	5	0	0	0	8	0	0	0	0
70067	3	3	0	0	1	0	0	0	0	0	0	0	6	10	4	1	1	1	0	0	1	0	0	0	0	2	0	2	0	1	0	0	0	0	0	0	0	0	0	0	0	0	0	2	2	0	0	0	0
772384	2	8	5	3	3	6	25	6	1	5	10	2	3	36	10	3	12	20	15	6	10	3	2	28	7	18	3	12	10	3	27	3	6	4	8	9	2	3	5	15	0	2	0	3	7	9	12	16	0
352852	12	1	1	0	4	9	0	0	1	2	0	2	0	0	1	0	20	0	2	0	0	0	6	0	0	0	0	1	0	2	0	3	0	0	4	0	0	0	1	0	0	6	0	3	6	0	0	0	0
New.ReferenceOTU2123	0	0	0	0	0	0	0	0	3	1	0	0	0	0	0	0	3	3	2	0	0	0	3	0	0	0	1	0	0	1	0	6	0	0	0	0	0	6	0	0	0	0	0	1	2	0	0	4	0
New.ReferenceOTU1596	0	1	0	0	0	0	0	0	0	0	0	0	0	0	0	2	0	0	0	0	0	0	1	0	0	1	0	0	2	3	0	1	0	0	0	0	0	0	6	6	0	0	9	0	0	7	0	0	7
791522	18	3	0	0	2	1	0	0	3	0	0	0	0	0	0	0	1	0	0	1	5	0	3	0	1	4	4	2	1	5	2	1	0	0	8	0	3	2	3	2	5	0	0	3	4	2	0	0	0
292544	0	0	0	0	0	0	0	0	0	0	0	0	0	0	0	0	0	0	0	0	0	0	0	0	0	0	0	0	0	0	0	0	0	0	0	0	0	0	0	0	0	0	1	0	0	0	0	0	3
343577	1	0	2	2	1	4	0	0	0	1	0	1	1	0	0	0	0	0	2	0	0	1	1	0	1	0	0	4	0	0	0	2	0	0	0	0	2	0	9	0	0	0	87	3	0	62	10	44	35
353195	67	40	20	54	55	78	67	39	34	31	78	120	90	65	15	30	36	52	70	58	3	14	37	76	24	23	43	19	30	30	79	51	56	69	15	38	18	33	11	46	158	21	1	32	11	2	2	8	0
24175	0	0	0	0	1	0	0	0	0	0	0	0	0	0	0	0	0	0	0	0	0	0	0	1	0	0	0	0	0	0	0	0	0	0	0	0	0	0	0	0	0	0	0	0	0	9	5	8	15
353964	1	0	2	1	0	1	4	3	0	3	2	5	4	4	0	0	0	1	2	0	2	2	1	2	0	0	0	0	3	1	0	2	0	0	2	2	2	0	0	0	27	1	2	0	0	3	0	2	0
New.ReferenceOTU878	0	2	1	0	2	5	1	0	1	6	1	3	5	0	4	2	5	5	7	0	2	0	0	3	12	5	5	0	7	3	7	2	0	0	6	3	1	1	0	0	0	1	25	4	0	9	10	16	6
262936	7	5	2	3	3	19	13	5	1	41	10	64	0	2	10	22	8	9	9	5	3	6	1	17	12	1	4	6	31	9	18	3	25	7	19	3	1	15	4	5	1	3	1	41	3	0	0	0	2
New.ReferenceOTU2602	0	2	0	0	1	2	0	4	4	0	0	1	0	0	1	4	2	0	0	0	0	0	5	0	5	0	0	0	0	0	0	11	0	0	1	1	0	2	0	0	0	0	0	0	13	0	0	4	0
441468	4	0	0	0	2	6	1	2	4	0	2	1	2	0	0	1	0	2	1	1	0	5	3	1	0	4	1	0	2	2	0	8	2	0	0	2	1	1	1	0	2	1	2	0	3	0	0	0	0
579431	10	0	0	0	0	1	0	0	0	0	0	1	0	0	1	0	0	0	0	0	0	0	0	0	2	0	0	0	0	0	0	0	0	0	0	0	3	0	4	0	0	0	0	0	0	0	0	0	0
352840	0	3	6	0	16	1	0	0	0	2	0	1	0	0	0	0	0	0	1	2	4	0	2	2	3	1	0	0	0	2	3	1	0	0	3	1	0	0	0	0	4	0	0	1	5	0	0	0	0
566022	0	0	0	0	0	0	0	0	0	0	0	2	0	0	0	0	0	0	1	0	0	0	0	0	1	0	0	0	0	0	0	0	0	2	0	0	0	1	0	0	0	0	27	0	0	23	12	0	13
19873	0	3	11	0	2	12	1	0	3	2	3	0	0	0	0	0	1	2	2	0	1	1	8	0	3	6	3	12	1	1	1	2	0	0	9	0	8	7	0	1	2	0	0	1	11	0	0	0	0
584137	0	2	1	0	0	5	5	7	1	0	5	5	3	2	0	0	0	0	1	6	0	3	4	3	2	1	5	0	1	1	3	1	3	1	1	1	1	6	0	0	3	2	0	1	4	0	0	0	0
553654	0	1	4	0	0	0	0	7	4	4	0	0	0	0	4	3	0	0	0	0	5	0	1	0	3	1	2	1	5	0	0	0	0	0	5	0	0	0	3	5	0	0	1	0	0	0	1	0	0
New.ReferenceOTU918	0	0	0	0	0	0	0	0	0	0	0	0	0	0	0	0	0	0	0	0	0	0	0	0	1	0	0	0	0	0	0	0	0	0	0	0	0	0	2	0	5	0	7	0	0	2	0	0	3
578457	0	1	0	0	0	2	0	1	0	0	0	0	0	1	3	3	0	0	0	0	0	0	2	0	11	0	2	3	0	0	0	2	0	0	0	0	0	0	10	0	48	0	0	1	0	0	0	1	0
509383	16	1	0	2	7	6	1	11	0	10	4	0	1	0	0	5	5	0	0	1	4	0	2	4	0	19	4	4	4	2	4	0	3	2	17	6	6	3	19	7	21	0	0	2	2	1	0	0	4
526468	0	8	4	1	11	7	1	5	9	40	0	0	0	1	3	6	28	0	1	2	7	0	5	8	7	5	6	4	2	7	6	20	15	0	16	9	1	18	1	6	9	6	0	6	29	0	0	0	0
New.ReferenceOTU2259	1	0	0	0	3	1	0	0	0	0	0	0	0	1	0	0	0	0	1	0	0	1	0	0	0	0	0	0	0	0	0	0	4	1	0	0	0	0	0	0	2	1	4	0	0	3	8	8	10
4373060	0	0	0	0	0	0	0	0	0	0	0	0	0	0	0	0	0	0	0	0	0	0	0	0	0	0	0	0	0	0	0	0	0	0	0	0	0	0	0	0	0	0	16	0	0	11	4	0	6
739826	59	16	38	169	15	94	44	115	7	124	74	362	1	53	71	85	35	61	80	103	57	31	85	22	59	68	85	48	112	49	90	60	91	95	136	29	255	77	118	164	97	50	285	123	31	142	56	5	172
New.ReferenceOTU2368	4	0	0	0	0	0	0	0	0	0	0	3	0	0	0	0	0	0	0	0	0	0	0	0	0	0	0	0	60	0	0	0	0	0	0	0	0	0	0	0	0	0	0	0	0	0	0	0	0
356138	2	1	0	0	13	6	0	1	10	7	0	0	0	2	5	1	2	1	0	1	1	4	5	0	0	3	1	0	2	26	2	0	14	0	4	0	4	6	26	14	7	4	1	25	3	2	3	0	0
520836	0	0	0	0	0	0	0	0	0	0	0	0	0	0	0	0	0	0	0	0	0	0	0	0	0	0	0	0	0	0	0	0	0	0	0	0	0	0	0	0	0	0	31	0	0	0	0	4	8
New.ReferenceOTU1717	0	10	4	0	51	11	2	1	1	2	0	0	0	5	0	2	20	0	2	0	0	0	0	0	0	5	0	1	0	3	0	12	0	0	1	3	1	6	2	0	3	3	0	4	6	8	2	20	4
299179	0	0	0	2	14	41	0	1	0	11	0	0	0	0	0	0	11	1	2	3	0	0	16	6	1	5	2	7	1	19	12	1	4	2	1	3	8	2	2	3	1	1	0	19	10	0	0	0	0
531773	2	1	0	0	1	1	0	0	0	0	1	0	1	0	0	0	1	0	0	0	0	0	0	0	0	2	0	7	0	0	0	1	1	0	0	1	0	2	0	0	10	0	5	0	3	5	5	12	13
879327	6	60	77	41	67	200	23	73	42	110	62	10	10	37	35	72	76	22	53	6	83	17	204	13	33	102	106	80	54	72	85	37	120	50	129	81	51	103	43	53	0	84	27	166	114	42	53	92	78
New.ReferenceOTU290	10	4	0	2	20	17	3	8	0	2	0	0	0	0	0	5	15	0	3	2	0	0	1	0	0	0	3	9	0	3	3	4	5	5	1	1	0	6	3	4	2	0	5	3	2	2	5	8	24
294708	0	0	0	0	0	0	0	2	0	2	2	5	0	0	0	0	0	0	1	0	0	0	0	0	0	0	0	0	0	1	0	2	0	0	6	1	0	0	0	0	0	0	15	2	0	38	26	5	6
New.ReferenceOTU1602	0	48	37	43	31	150	11	77	74	82	52	64	0	34	8	74	32	14	140	21	38	1	150	6	2	30	45	5	49	78	48	108	40	20	160	36	2	98	25	72	0	77	20	130	11	62	60	9	16
1105328	0	0	4	0	1	0	4	0	9	2	0	0	0	0	3	0	2	0	0	0	0	4	1	2	0	2	0	4	0	1	1	3	8	5	1	5	1	3	3	0	6	1	0	2	6	0	0	2	1
804526	12	8	15	3	0	1	28	1	2	3	6	32	204	7	3	0	6	33	28	5	4	0	0	47	5	2	7	1	1	5	2	0	4	11	2	2	2	6	0	4	0	18	0	0	1	0	2	0	0
341730	0	0	0	1	1	0	0	0	0	0	0	0	0	2	0	1	1	0	4	0	0	3	0	0	0	0	0	0	0	0	0	0	0	0	0	1	0	0	0	0	0	0	20	0	0	166	16	8	14
New.ReferenceOTU1039	4	4	0	0	0	0	0	0	1	0	2	0	0	0	0	0	0	2	7	0	0	0	0	0	1	0	1	2	1	0	0	1	0	0	0	0	0	0	3	0	1	0	0	0	1	3	0	0	1
531052	15	23	29	15	12	3	65	10	17	2	38	2	71	84	43	31	7	45	45	1	40	13	11	1	15	8	37	51	26	13	16	14	1	3	10	13	14	5	24	36	45	2	0	5	13	1	0	0	0
New.ReferenceOTU1710	0	0	1	0	0	3	0	0	0	3	2	2	0	0	0	0	2	2	0	0	0	0	3	1	0	0	6	0	0	0	1	0	0	0	0	4	0	3	1	2	0	0	0	0	0	1	0	0	3
New.ReferenceOTU1533	0	0	0	0	0	0	5	0	1	0	0	0	0	0	1	0	0	0	2	0	2	0	0	0	2	2	5	0	0	0	0	0	0	0	8	9	2	0	5	0	0	0	0	0	4	4	1	4	0
575261	0	0	25	55	0	2	0	5	0	3	0	0	1	0	0	16	0	1	12	0	0	8	0	2	0	2	54	2	50	0	0	0	2	0	5	0	13	2	4	27	0	0	6	2	0	4	0	1	14
183362	1	5	23	26	14	17	26	10	14	11	38	27	7	31	9	16	19	54	28	29	0	5	12	28	0	16	13	3	2	10	10	10	27	64	14	42	6	22	1	24	0	44	0	3	5	0	0	0	0
New.ReferenceOTU1107	2	0	5	4	5	4	5	7	0	1	8	6	2	0	0	0	0	15	6	6	2	4	0	3	0	1	1	0	3	1	0	0	3	14	0	3	0	5	0	5	0	6	9	0	1	9	2	18	0
New.ReferenceOTU1715	0	0	0	0	0	0	0	0	0	0	0	0	0	0	0	0	1	0	0	0	0	0	0	0	0	0	0	2	0	0	0	2	0	0	0	0	0	0	0	0	0	1	3	0	3	11	4	0	10
310760	3	1	0	0	0	1	1	16	1	1	2	0	0	0	1	4	7	0	1	0	0	0	1	0	1	5	3	0	0	4	1	3	2	0	6	7	0	2	0	0	2	1	0	0	11	0	0	0	0
New.ReferenceOTU1032	11	0	2	3	8	2	0	6	0	3	0	1	2	1	0	5	1	0	18	8	3	1	3	6	2	6	7	0	7	1	5	1	4	0	4	8	0	3	0	1	3	8	10	6	4	0	6	1	0
New.CleanUp.ReferenceOTU2361	0	0	0	0	0	0	0	7	0	0	0	0	0	0	0	1	0	0	2	1	0	0	0	0	0	0	0	0	1	0	1	0	0	0	0	1	0	0	0	0	0	1	3	1	0	0	8	1	2
297575	30	8	16	11	0	7	6	8	0	13	5	4	6	1	0	7	1	1	7	13	0	18	2	26	0	28	12	0	6	3	23	2	7	6	15	11	3	16	0	6	1	11	0	16	14	0	0	0	0
583958	28	2	12	5	0	3	0	15	0	10	1	4	7	0	0	7	8	5	5	10	5	18	11	11	3	8	16	1	8	0	12	3	7	4	4	4	0	15	0	0	2	11	0	6	10	0	0	0	0
New.ReferenceOTU1959	1	0	0	2	1	6	0	0	1	0	0	1	1	0	0	1	0	0	0	3	0	0	2	0	0	0	0	0	0	0	3	0	0	0	0	3	1	2	0	0	5	0	0	0	0	0	0	0	0
New.ReferenceOTU906	43	27	8	4	27	86	2	6	10	20	0	4	0	0	43	12	16	5	12	11	18	4	20	9	48	11	21	16	35	15	22	15	17	1	5	8	25	7	40	27	1	28	0	16	14	4	1	12	7
577206	20	11	2	0	0	14	1	1	2	12	0	3	0	4	1	0	10	1	1	0	5	1	9	4	0	1	0	2	6	5	15	0	19	3	2	9	0	3	1	5	4	6	0	1	5	0	0	0	0
4450025	0	0	1	0	0	0	0	0	0	0	0	1	0	0	0	2	0	0	0	0	0	0	0	0	0	0	0	0	2	0	0	0	0	0	0	0	0	0	0	0	0	1	35	0	0	40	5	13	16
New.ReferenceOTU1767	0	1	14	44	0	6	6	18	2	23	11	53	1	13	12	15	6	19	28	4	5	1	12	8	8	22	28	12	8	2	0	2	7	37	7	15	12	0	7	35	0	17	1	40	2	0	1	0	0
310409	1	1	0	0	0	1	1	3	0	0	2	1	0	1	0	0	7	0	2	2	0	0	0	1	2	3	0	0	3	1	3	3	0	3	0	1	3	2	0	0	0	0	0	2	0	0	0	0	0
753891	81	177	155	131	173	309	238	111	152	330	165	186	114	95	214	165	256	91	240	362	93	145	174	119	115	112	153	109	254	161	561	258	293	104	228	116	167	176	147	223	173	337	197	304	142	386	158	149	253
New.ReferenceOTU1151	0	1	0	1	1	2	0	0	1	2	1	6	0	0	3	0	0	0	1	2	0	0	3	0	1	0	1	0	1	0	2	1	3	1	1	4	0	0	0	0	0	6	2	1	1	7	4	3	2
[truncated: 23 more columns]
