# Supplementary material for: Transport to the Slaughterhouse Affects the Salmonella Shedding and Modifies the Fecal Microbiota of Finishing Pigs
Source: Animals (Basel). 2020 Apr 13;10(4):676. doi: 10.3390/ani10040676 (PMC7222783; doi:10.3390/ani10040676)
Supplement: Supplementary file 1 [file animals-10-00676-s001.zip › Table_S2.xlsx]

## Sheet: Foglio1
Table S2. Fecal core microbiota at the Family level in our cohort.
OTU	HERD55	SLAUGHTER16	HERD14	HERD43	SLAUGHTER36	HERD11	HERD12	HERD13	HERD16	HERD15	HERD20	HERD21	HERD28	HERD27	HERD23	HERD24	HERD38	HERD4	HERD49	HERD36	HERD30	HERD53	SLAUGHTER11	HERD57	SLAUGHTER13	SLAUGHTER1	SLAUGHTER14	SLAUGHTER32	SLAUGHTER46	SLAUGHTER55	SLAUGHTER57	SLAUGHTER48	HERD1	HERD19	HERD2	HERD25	HERD40	HERD48	HERD32	HERD46	SLAUGHTER12	HERD6	SLAUGHTER20	SLAUGHTER15	SLAUGHTER18	SLAUGHTER23	SLAUGHTER24	SLAUGHTER25	SLAUGHTER26
4451049	0.037769	0.0142409	0.0337388	0.114564	0.00777842	0.010544	0.0603048	0.0121243	0.01806	0.0261324	0.175405	0.158702	0.062376	0.169022	0.137627	0.0655019	0.00922305	0.132686	0.0601005	0.113154	0.0463065	0.0668261	0.0206431	0.0457511	0.152975	0.0149508	0.0388123	0.017563	0.23977	0.0309496	0.0178935	0.0113653	0.0263866	0.236451	0.0488354	0.0132701	0.146827	0.0333091	0.0613703	0.074743	0.00820982	0.0362569	0.156681	0.034753	0.0092721	0.0240058	0.0330765	0.0110114	0.0204776
4453773	0.00988142	0.00525816	0.00644367	0.00645019	0.00261704	0.00563813	0.00500726	0.00333963	0.00589863	0.00493612	0.00803272	0.00574587	0.00749394	0.00790027	0.00645602	0.0046787	0.00435328	0.00608387	0.00582793	0.00398176	0.0061742	0.00746539	0.00512364	0.00689604	0.0065049	0.00340463	0.00583643	0.00304812	0.00988444	0.00509758	0.00996509	0.00699403	0.00603329	0.00979467	0.003991	0.00364564	0.00541094	0.00732946	0.00510204	0.010279	0.0105347	0.00315596	0.00861125	0.00319234	0.0108783	0.00539949	0.00290782	0.0034274	0.00303907
45921	0.0193237	0.0221281	0.0152766	0.0321044	0.0164292	0.0125211	0.0286647	0.00602585	0.0212642	0.01009	0.0839054	0.0386937	0.0672985	0.0544321	0.0154945	0.0119161	0.0247916	0.101543	0.0220004	0.00694997	0.0113929	0.0964702	0.0236875	0.0296604	0.0198801	0.00732736	0.0240753	0.0127731	0.0375754	0.0167492	0.0185482	0.0185779	0.0130116	0.10571	0.0105943	0.00663507	0.0166715	0.0246009	0.0423469	0.0245228	0.039814	0.0133578	0.0421805	0.0120438	0.025261	0.0199927	0.00785112	0.0074382	0.0321997
New.ReferenceOTU1244	0.0159567	0.0143139	0.0152042	0.00710987	0.0106862	0.0144981	0.00689405	0.00667925	0.0136906	0.0222125	0.00284796	0.00610954	0.00991845	0.00608828	0.00926629	0.0092112	0.0147569	0.00478018	0.0123115	0.0153479	0.0129364	0.0123215	0.0115096	0.010307	0.00752814	0.00851158	0.0160502	0.0127005	0.00697725	0.0109234	0.0151295	0.0129681	0.00981319	0.00166872	0.0132066	0.0369668	0.00716584	0.0199565	0.0095481	0.0142438	0.00174368	0.0132844	0.00977888	0.00594936	0.0149668	0.00904779	0.0133033	0.0182309	0.0139653
577228	0.0488215	0.0305996	0.0488705	0.0237484	0.0242076	0.0492788	0.0216981	0.0394947	0.0339353	0.0691783	0.00576895	0.00218198	0.0193961	0.0127564	0.0135956	0.0227356	0.0337933	0.00210038	0.0270999	0.0375733	0.0351341	0.0292092	0.0444048	0.0434525	0.00833212	0.0300496	0.0460349	0.0516728	0.00799477	0.0538887	0.0586994	0.03905	0.0545177	0.0104477	0.0409985	0.0616843	0.0120649	0.0396952	0.0143586	0.0139501	0.0111886	0.0407339	0.0166387	0.0455634	0.0499379	0.02583	0.0285694	0.09728	0.0463821
298358	0.055336	0.133207	0.10433	0.129444	0.083091	0.108809	0.0822206	0.0963409	0.15737	0.132985	0.0330072	0.149247	0.116964	0.0280496	0.0968403	0.118064	0.076662	0.0307815	0.128214	0.0807935	0.104741	0.13358	0.121037	0.0879431	0.154875	0.0963659	0.123441	0.0759126	0.0827822	0.114768	0.0548443	0.117077	0.112597	0.062178	0.120964	0.110317	0.104928	0.148549	0.115598	0.126432	0.0511479	0.150606	0.0823177	0.177683	0.104767	0.0720905	0.080474	0.0894042	0.0626628
315271	0.0570195	0.0479807	0.0335216	0.0179579	0.0575022	0.0292158	0.0196662	0.0196747	0.0675066	0.0803571	0.00182562	0.0444396	0.0119021	0.00231934	0.0612942	0.0295343	0.0368184	0.00210038	0.0659285	0.0429306	0.0351341	0.0179749	0.0320042	0.0126798	0.0486771	0.0508475	0.0389582	0.0490602	0.0156988	0.0613166	0.0185482	0.0595221	0.0527731	0.00166872	0.0654524	0.0432373	0.0471629	0.0465167	0.0321429	0.0240088	0.0476606	0.0391193	0.0275852	0.0576072	0.0401548	0.0298431	0.0367113	0.0274192	0.0248191
343443	0.288684	0.193018	0.111787	0.104303	0.360279	0.122208	0.0730044	0.141571	0.14164	0.194977	0.0425004	0.0304022	0.0439351	0.0265275	0.0281027	0.100007	0.294621	0.0225248	0.0702994	0.134583	0.0994487	0.0606654	0.197743	0.0900193	0.0176144	0.197321	0.103013	0.168808	0.0085762	0.175648	0.167952	0.171864	0.22047	0.0283683	0.190842	0.195625	0.052647	0.117126	0.211662	0.0628488	0.432505	0.140771	0.171568	0.111732	0.218004	0.144984	0.204856	0.244294	0.248336
New.ReferenceOTU433	0.0393061	0.0670416	0.0299739	0.102837	0.0459436	0.0613605	0.127504	0.0406563	0.0700553	0.0408682	0.077041	0.0685868	0.0823599	0.0537798	0.0906122	0.0695226	0.0699476	0.05461	0.0952867	0.0677623	0.0533627	0.0577662	0.0380189	0.0301053	0.118258	0.086152	0.0443569	0.0301183	0.0356131	0.0459511	0.0232034	0.0547137	0.0277677	0.0431691	0.036427	0.046883	0.0963732	0.0515239	0.0919825	0.0692364	0.0164196	0.0595229	0.0538568	0.0584053	0.042199	0.0483035	0.041073	0.0394516	0.0316932
532232	0.0017567	0.0671146	0.174341	0.0180312	0.0136668	0.0483269	0.0396226	0.0158269	0.0750801	0.00675087	0.0192055	0.0178195	0.0121225	0.0215989	0.0233936	0.0030704	0.0117317	0.0945173	0.0209805	0.0528488	0.0116134	0.0123215	0.0259152	0.0754857	0.0153486	0.0840056	0.0263369	0.180565	0.00385202	0.021337	0.0146203	0.118316	0.0102493	0.0318508	0.00674842	0.0833394	0.00840889	0.0453556	0.0139942	0.028928	0.0189625	0.0151927	0.00116763	0.00645723	0.0116814	0.108136	0.0995929	0.0234814	0.11288
683621	0.00673401	0.0234426	0.0191862	0.023895	0.0181739	0.0328037	0.016328	0.0202556	0.0186426	0.0142276	0.0200818	0.0175285	0.0103593	0.0236283	0.014583	0.0210542	0.0323176	0.0341131	0.0204706	0.0103526	0.0117604	0.0160905	0.0196035	0.01965	0.0113288	0.0291614	0.0218137	0.01466	0.0228941	0.0222109	0.0317864	0.0278304	0.0150469	0.0151636	0.0186489	0.0239154	0.0170371	0.0307692	0.0181487	0.0196769	0.0213601	0.0248807	0.0206524	0.0265545	0.0257721	0.0445823	0.0122129	0.0289506	0.0177279
New.ReferenceOTU1882	0.00358659	0.00562331	0.00543006	0.00439786	0.00530678	0.00344146	0.0011611	0.00304922	0.00400524	0.00500871	0.00182562	0.00327297	0.00124899	0.00449373	0.00273432	0.00380145	0.0066406	0.00224524	0.00407955	0.00304061	0.00441014	0.00492861	0.00579194	0.00229868	0.00343517	0.0042928	0.00569052	0.00384643	0.0050149	0.0038596	0.00647367	0.00488125	0.00414335	0.00188638	0.00544228	0.00277069	0.00424101	0.00674891	0.00561224	0.00550661	0.00152572	0.0039633	0.0040867	0.00391787	0.00430751	0.0121853	0.00537947	0.0034274	0.00354559
528782	0.0627287	0.0465201	0.0646539	0.0713919	0.0363478	0.0641429	0.117852	0.0463192	0.03612	0.0578542	0.131883	0.101826	0.154287	0.145901	0.0884095	0.0966445	0.0445658	0.0919099	0.109492	0.078694	0.0913635	0.0718997	0.0619292	0.10129	0.0714077	0.0557324	0.0904647	0.0474635	0.104223	0.0447131	0.0934681	0.041017	0.0549538	0.0874265	0.0634207	0.0545388	0.08716	0.0444848	0.0573615	0.101101	0.0432287	0.0575413	0.0734146	0.0817674	0.0491348	0.066618	0.0505234	0.0410559	0.0471056
322895	0.128019	0.152414	0.187301	0.176721	0.140084	0.219594	0.271335	0.160229	0.180746	0.178789	0.259384	0.212743	0.248696	0.305501	0.255507	0.246729	0.180182	0.293474	0.188606	0.165786	0.295259	0.253388	0.23591	0.255228	0.238781	0.186589	0.221347	0.209885	0.237372	0.22961	0.27524	0.163922	0.220615	0.220634	0.224947	0.180678	0.258043	0.200943	0.191983	0.225037	0.1424	0.208294	0.179815	0.188928	0.24071	0.18745	0.203838	0.21002	0.170695
355697	0.0811009	0.0848609	0.0553142	0.0778421	0.0828729	0.12543	0.0804064	0.0674459	0.0719487	0.101916	0.0874105	0.081315	0.0754537	0.0782779	0.079599	0.0742744	0.0928208	0.0840154	0.0976907	0.110258	0.0738699	0.0618975	0.0951214	0.0664393	0.0776933	0.0733476	0.0754359	0.0568256	0.0918671	0.0861491	0.120236	0.0906309	0.090354	0.0876442	0.0965823	0.0757565	0.0754607	0.0950653	0.0642128	0.099486	0.103458	0.0972477	0.0905641	0.114489	0.0987808	0.129734	0.0650625	0.086779	0.0918958
[truncated: 23 more columns]
