# Supplementary material for: Transport to the Slaughterhouse Affects the Salmonella Shedding and Modifies the Fecal Microbiota of Finishing Pigs
Source: Animals (Basel). 2020 Apr 13;10(4):676. doi: 10.3390/ani10040676 (PMC7222783; doi:10.3390/ani10040676)
Supplement: Supplementary file 1 [file animals-10-00676-s001.zip › Table_S3.xlsx]

## Sheet: Foglio1
Table S3. Differentially abundant OTUs when comparing the sample of the Test 1. We compared faecal samples collected at the slaughterhouse, from Salmonella negative animals and from Salmonella positive pigs.
OTU	+samples in group 0	+samples in group 1	counts in group 0	counts in group 1	oddsRatio	lower	upper	fisherP	fisherAdjP	(Intercept)	Slaughter_category_fecesPOS	normFactor_Slaughter_category_feces	pvalues	adjPvalues	Kingdom	Phylum	Class	Order	Family	Genus	Species
322732	3	0	384	0	Inf	0,271762641840898	Inf	0,261363636363636	0,689869377455485	222109076801727	-895733015074954	-156719302169356	2.07633e+09	0,011889690887566	k__Bacteria	p__Bacteroidetes	c__Bacteroidia	o__Bacteroidales	f__	g__	s__
198866	2	3	3	81	0,382331954670058	0,027530833438604	393046153706349	0,359958034179391	0,798857426726279	-438433285973549	548704668983537	438732738980193	7.32059e+08	0,00905556406924	k__Bacteria	p__Bacteroidetes	c__Bacteroidia	o__Bacteroidales	f__Porphyromonadaceae	g__Parabacteroides	s__
105964	3	2	39	45	0,971452901353122	0,094449409602713	133991972212635	1	1	-178377303607788	487920524290517	197688296217906	0,000340698147583	0,038313055323636	k__Bacteria	p__Firmicutes	c__Clostridia	o__Clostridiales	f__Ruminococcaceae	g__Ruminococcus	s__flavefaciens
344284	0	1	0	14	0	0	253501467839102	0,393939393939394	0,798857426726279	-3.59979e+08	390684737758714	3.41851e+09	0,000161852037811	0,028601567253231	k__Bacteria	p__Firmicutes	c__Clostridia	o__Clostridiales	f__	g__	s__
355246	0	4	0	35	0	0	0,859078855013488	0,01747311827957	0,395505230284196	-344656937642585	329268476500612	325367667609398	6.54954e+09	0,016203566994279	k__Bacteria	p__Bacteroidetes	c__Bacteroidia	o__Bacteroidales	f__[Odoribacteraceae]	g__Butyricimonas	s__
New.ReferenceOTU895	1	5	2	100	0,091379376589003	0,001700602480371	0,996868971919328	0,024789448593676	0,395505230284196	-709831749994429	322111267153053	67437653822674	5.39877e+09	0,016203566994279	k__Bacteria	p__Firmicutes	c__Clostridia	o__Clostridiales	f__Lachnospiraceae	NA	NA
New.ReferenceOTU2081	3	8	4	130	0,119772097605619	0,014522759319193	0,729239976977614	0,009180624741393	0,366336542100091	0,478098957708769	296225565083887	-0,012383339734166	2.88351e+09	0,011889690887566	k__Bacteria	p__Bacteroidetes	c__Bacteroidia	o__Bacteroidales	f__Prevotellaceae	g__Prevotella	s__
302975	5	5	16	82	0,543947621739465	0,091762518586465	315263688996909	0,461067853170189	0,820523421482937	-806306022240897	273779338698137	868703543053194	0,000233446052531	0,028877276698058	k__Bacteria	p__Firmicutes	c__Bacilli	o__Lactobacillales	f__Lactobacillaceae	g__Lactobacillus	s__
343740	11	1	56	2	135500000941266	148078749205129	679799098823139	0,008963663329626	0,366336542100091	603629063395703	-224973505936266	-37454784517637	0,00022116747607	0,028877276698058	k__Bacteria	p__Firmicutes	c__Clostridia	o__Clostridiales	f__	g__	s__
309873	13	2	97	2	944252618081055	14602150961896	111509595907097	0,010984830165562	0,395505230284196	209074476306183	-219455546368686	0,539270010892412	0,000142209592146	0,028601567253231	k__Bacteria	p__Firmicutes	c__Clostridia	o__Clostridiales	f__	g__	s__
759751	9	6	21	69	0,955864571288177	0,190116621109151	486877716261775	1	1	-178909687720426	217755498086128	267819460846603	0,000193197351022	0,028877276698058	k__Bacteria	p__Firmicutes	c__Clostridia	o__Clostridiales	f__Lachnospiraceae	g__	s__
328458	15	8	256	167	183841230301209	0,317194791186309	10897695654002	0,461067853170189	0,820523421482937	-753646033237701	214590276883306	971248700542288	0,000378537644645	0,039020922202105	k__Bacteria	p__Firmicutes	c__Bacilli	o__Lactobacillales	f__Streptococcaceae	g__Streptococcus	s__
