# Supplementary material for: Transport to the Slaughterhouse Affects the Salmonella Shedding and Modifies the Fecal Microbiota of Finishing Pigs
Source: Animals (Basel). 2020 Apr 13;10(4):676. doi: 10.3390/ani10040676 (PMC7222783; doi:10.3390/ani10040676)
Supplement: Supplementary file 1 [file animals-10-00676-s001.zip › Table_S4.xlsx]

## Sheet: Foglio1
Table S4. Differentially abundant OTUs when comparing the sample of the Test 2. We included the animals which became Salmonella-positive after transport. We compared faecal samples collected from the same pig on farm and at the slaughterhouse.
OTU	+samples in group 0	+samples in group 1	counts in group 0	counts in group 1	oddsRatio	lower	upper	fisherP	fisherAdjP	(Intercept)	SamplingSLAUGHTER	normFactor_neg_vs_pos	pvalues	adjPvalues	Kingdom	Phylum	Class	Order	Family	Genus	Species
300855	3	5	3	509	0.466966	0.0505911	3.59385	0.659443	1	-2.61612	6.04637	3.13925	7.70124e-10	9.51874e-07	k__Bacteria	p__Firmicutes	c__Clostridia	o__Clostridiales	f__Clostridiaceae	g__	s__
181768	0	1	0	64	0	0	39.0005	1	1	-3.0067e-05	6.02231	3.10933e-05	0.000291029	0.00620194	k__Bacteria	p__Firmicutes	c__Clostridia	o__Clostridiales	f__Ruminococcaceae	g__Ruminococcus	s__flavefaciens
850841	0	1	0	46	0	0	39.0005	1	1	-2.47661e-05	5.55453	2.55828e-05	0.000398874	0.00725011	k__Bacteria	p__Firmicutes	c__Clostridia	o__Clostridiales	f__Ruminococcaceae	g__	s__
289495	0	5	0	272	0	0	0.864193	0.0350877	0.344472	-4.34782	5.29848	4.26879	7.55309e-06	0.00116695	k__Bacteria	p__Firmicutes	c__Clostridia	o__Clostridiales	f__Ruminococcaceae	g__	s__
318163	0	5	0	231	0	0	0.864193	0.0350877	0.344472	-1.11078	5.17866	1.09126	4.98319e-06	0.000879889	k__Bacteria	p__Firmicutes	c__Clostridia	o__Clostridiales	f__Ruminococcaceae	g__	s__
New.ReferenceOTU1522	3	1	13	99	3.53774	0.23115	215.848	0.586466	1	-6.40674	5.13936	7.64938	0.000188272	0.00495115	k__Bacteria	p__Fibrobacteres	c__Fibrobacteria	o__Fibrobacterales	f__Fibrobacteraceae	g__Fibrobacter	s__succinogenes
198866	0	3	0	81	0	0	2.27239	0.214286	0.710647	-2.91539	4.83222	2.98762	4.03215e-05	0.00311484	k__Bacteria	p__Bacteroidetes	c__Bacteroidia	o__Bacteroidales	f__Porphyromonadaceae	g__Parabacteroides	s__
4466705	0	2	0	84	0	0	5.24114	0.47619	1	-3.82274	4.82168	4.04076	0.0130886	0.0498516	k__Bacteria	p__Firmicutes	c__Clostridia	o__Clostridiales	f__	g__	s__
233549	11	6	4389	99	Inf	1.15715	Inf	0.0350877	0.344472	16.0119	-4.72616	-8.369	2.99222e-06	0.000865626	k__Bacteria	p__Bacteroidetes	c__Bacteroidia	o__Bacteroidales	f__Bacteroidaceae	g__Bacteroides	s__
733799	6	6	1963	80	1	0.138669	7.21144	1	1	13.3838	-4.68256	-6.61497	0.000122881	0.00404717	k__Bacteria	p__Bacteroidetes	c__Bacteroidia	o__Bacteroidales	f__	g__	s__
354905	2	4	3	167	0.406124	0.0286546	3.84059	0.635117	1	2.71808	4.67625	-2.31427	7.73806e-07	0.000478212	k__Bacteria	p__Firmicutes	c__Bacilli	o__Lactobacillales	f__Lactobacillaceae	g__Lactobacillus	s__
268733	0	5	0	224	0	0	0.864193	0.0350877	0.344472	-0.479967	4.66836	0.471551	3.71812e-05	0.00306373	k__Bacteria	p__Firmicutes	c__Clostridia	o__Clostridiales	f__Clostridiaceae	g__	s__
New.ReferenceOTU710	6	4	765	14	2.02883	0.286707	16.0874	0.669921	1	11.8268	-4.56944	-6.36891	1.94194e-05	0.00221105	k__Bacteria	p__Spirochaetes	c__Spirochaetes	o__Spirochaetales	f__Spirochaetaceae	g__Treponema	s__
New.ReferenceOTU1034	3	10	6	5971	0.0458803	0.000778864	0.544737	0.0075188	0.34042	0.368901	4.50217	0.432503	0.0105545	0.0436937	k__Bacteria	p__Bacteroidetes	c__Bacteroidia	o__Bacteroidales	f__Prevotellaceae	g__Prevotella	s__
780650	1	6	1	309	0.0941933	0.00165826	1.09548	0.0634675	0.466983	-1.70213	4.49786	1.89202	5.88812e-05	0.00351959	k__Bacteria	p__Firmicutes	c__Clostridia	o__Clostridiales	f__Clostridiaceae	g__	s__
New.ReferenceOTU280	0	3	0	119	0	0	2.27239	0.214286	0.710647	3.55351	4.45524	-3.6129	8.05225e-05	0.00382792	k__Bacteria	p__Bacteroidetes	c__Bacteroidia	o__Bacteroidales	f__Prevotellaceae	g__Prevotella	s__
343353	0	5	0	148	0	0	0.864193	0.0350877	0.344472	-5.68186	4.4447	5.57346	1.96776e-05	0.00221105	k__Bacteria	p__Firmicutes	c__Clostridia	o__Clostridiales	f__	g__	s__
349458	0	5	0	223	0	0	0.864193	0.0350877	0.344472	0.335305	4.44022	-0.329424	0.000122243	0.00404717	k__Bacteria	p__Firmicutes	c__Clostridia	o__Clostridiales	f__Lachnospiraceae	g__	s__
296325	3	9	5	1114	0.0961195	0.00634813	0.840562	0.0299731	0.344472	1.12639	4.43932	-0.352663	0.000161517	0.00457136	k__Bacteria	p__Bacteroidetes	c__Bacteroidia	o__Bacteroidales	f__Prevotellaceae	g__Prevotella	s__
173654	0	6	0	313	0	0	0.597142	0.0123839	0.34042	1.96742	4.42663	-1.93228	0.000221449	0.00547422	k__Bacteria	p__Proteobacteria	c__Gammaproteobacteria	o__Enterobacteriales	f__Enterobacteriaceae	g__	s__
New.ReferenceOTU2083	3	1	100	1	3.53774	0.23115	215.848	0.586466	1	2.15008	-4.36886	2.75276	7.32663e-05	0.00362229	k__Bacteria	p__Firmicutes	c__Clostridia	o__Clostridiales	f__Ruminococcaceae	g__	s__
224786	0	5	0	163	0	0	0.864193	0.0350877	0.344472	-2.27662	4.32238	2.23619	4.55712e-05	0.00312922	k__Bacteria	p__Firmicutes	c__Clostridia	o__Clostridiales	f__Christensenellaceae	g__	s__
520836	0	2	0	37	0	0	5.24114	0.47619	1	-0.0270772	4.24498	0.0279804	0.000106618	0.00404717	k__Bacteria	p__Firmicutes	c__Clostridia	o__Clostridiales	f__Lachnospiraceae	g__Anaerostipes	s__
New.ReferenceOTU1983	0	5	0	335	0	0	0.864193	0.0350877	0.344472	3.65456	4.15592	-3.58446	0.000529623	0.00840516	k__Bacteria	p__Firmicutes	c__Clostridia	o__Clostridiales	f__Lachnospiraceae	g__	s__
571111	5	0	182	0	Inf	1.15715	Inf	0.0350877	0.344472	-1.04989	-4.13378	5.75432	0.000106577	0.00404717	k__Bacteria	p__Firmicutes	c__Clostridia	o__Clostridiales	f__Ruminococcaceae	g__Ruminococcus	s__flavefaciens
350071	11	6	1293	35	Inf	1.15715	Inf	0.0350877	0.344472	9.99859	-4.09524	-3.56415	1.34981e-06	0.000556123	k__Bacteria	p__Bacteroidetes	c__Bacteroidia	o__Bacteroidales	f__	g__	s__
New.ReferenceOTU2368	2	2	8	71	1	0.059902	16.6939	1	1	-0.917252	4.014	1.94005	0.000265652	0.00577431	k__Bacteria	p__Firmicutes	c__Clostridia	o__Clostridiales	f__Ruminococcaceae	g__	s__
New.ReferenceOTU1045	4	6	5	784	0.492895	0.0621606	3.48788	0.669921	1	7.25526	3.87215	-6.4789	0.000343445	0.00673802	k__Bacteria	p__Bacteroidetes	c__Bacteroidia	o__Bacteroidales	f__Prevotellaceae	g__Prevotella	NA
2612863	8	1	48	47	21.7958	1.83575	1283.92	0.0075188	0.34042	5.77953	3.76427	-3.96616	0.00117057	0.0130083	k__Bacteria	p__Bacteroidetes	c__Bacteroidia	o__Bacteroidales	f__Bacteroidaceae	g__Bacteroides	s__
529116	0	5	0	136	0	0	0.864193	0.0350877	0.344472	1.60896	3.74124	-1.58051	0.000317903	0.00639763	k__Bacteria	p__Firmicutes	c__Clostridia	o__Clostridiales	f__Clostridiaceae	g__Clostridium	s__butyricum
178242	1	5	2	113	0.132389	0.00231856	1.59493	0.148607	0.649564	-2.8194	3.73174	3.10867	5.23371e-05	0.00340467	k__Bacteria	p__Firmicutes	c__Clostridia	o__Clostridiales	f__Ruminococcaceae	g__	s__
338133	0	5	0	89	0	0	0.864193	0.0350877	0.344472	-4.87329	3.70708	4.7803	6.04644e-05	0.00351959	k__Bacteria	p__Firmicutes	c__Clostridia	o__Clostridiales	f__Ruminococcaceae	g__Oscillospira	s__
295854	0	5	0	77	0	0	0.864193	0.0350877	0.344472	-0.00910759	3.66123	0.00894792	3.40164e-05	0.00300317	k__Bacteria	p__Firmicutes	c__Clostridia	o__Clostridiales	f__Lachnospiraceae	g__	s__
New.ReferenceOTU2604	2	4	8	367	0.406124	0.0286546	3.84059	0.635117	1	-0.980647	3.52976	1.84547	0.00140256	0.0142095	k__Bacteria	p__Bacteroidetes	c__Bacteroidia	o__Bacteroidales	f__	g__	s__
1068836	0	4	0	43	0	0	1.32125	0.0902256	0.466983	-1.2331	3.5112	1.26771	3.81531e-06	0.000865626	k__Bacteria	p__Firmicutes	c__Clostridia	o__Clostridiales	f__Ruminococcaceae	g__Ruminococcus	s__
343577	4	9	4	654	0.141516	0.00994106	1.19202	0.0804954	0.466983	0.0255038	3.48457	0.643701	0.00289469	0.019551	k__Bacteria	p__Firmicutes	c__Clostridia	o__Clostridiales	f__	g__	s__
113126	0	5	0	87	0	0	0.864193	0.0350877	0.344472	-2.6791	3.47414	2.63089	0.000175173	0.00470682	k__Bacteria	p__Firmicutes	c__Clostridia	o__Clostridiales	f__	g__	s__
353085	0	5	0	73	0	0	0.864193	0.0350877	0.344472	-1.6005	3.41579	1.57216	0.00011788	0.00404717	k__Bacteria	p__Firmicutes	c__Clostridia	o__Clostridiales	f__Lachnospiraceae	g__	s__
875709	1	7	1	405	0.0666871	0.0011634	0.77182	0.0237358	0.344472	8.56026	3.39961	-8.07988	0.000620143	0.00941802	k__Bacteria	p__Firmicutes	c__Clostridia	o__Clostridiales	f__Lachnospiraceae	g__	s__
New.ReferenceOTU2392	0	3	0	115	0	0	2.27239	0.214286	0.710647	-7.55496	3.38474	7.39709	0.00152213	0.0143615	k__Bacteria	p__Bacteroidetes	c__Bacteroidia	o__Bacteroidales	f__Prevotellaceae	g__Prevotella	s__
585073	5	8	6	523	0.330345	0.0354397	2.45991	0.386997	0.911263	3.28388	3.36655	-2.32722	0.00144175	0.0142277	k__Bacteria	p__Firmicutes	c__Clostridia	o__Clostridiales	f__Ruminococcaceae	g__Oscillospira	s__
157805	7	3	299	21	4.32144	0.578124	42.0474	0.198381	0.710647	7.33403	-3.36568	-2.57075	0.00013871	0.00428613	k__Bacteria	p__Bacteroidetes	c__Bacteroidia	o__Bacteroidales	f__[Odoribacteraceae]	g__Butyricimonas	s__
New.ReferenceOTU515	9	7	1232	185	2.4623	0.260377	34.8984	0.635117	1	14.059	-3.34993	-8.14929	0.000499824	0.00834842	k__Bacteria	p__Firmicutes	c__Clostridia	o__Clostridiales	f__Lachnospiraceae	g__	s__
351231	7	5	504	16	2.02883	0.286707	16.0874	0.669921	1	9.23336	-3.34826	-4.77402	0.00261492	0.0185055	k__Bacteria	p__Bacteroidetes	c__Bacteroidia	o__Bacteroidales	f__Bacteroidaceae	g__Bacteroides	s__fragilis
341730	4	7	4	351	0.344506	0.0408936	2.45358	0.394856	0.911263	-4.17927	3.33814	4.6268	0.000370659	0.00694143	k__Bacteria	p__Firmicutes	c__Clostridia	o__Clostridiales	f__Lachnospiraceae	g__Coprococcus	s__
New.ReferenceOTU2081	0	7	0	118	0	0	0.422165	0.00386997	0.239358	0.655362	3.33135	-0.643681	0.000254969	0.00577431	k__Bacteria	p__Bacteroidetes	c__Bacteroidia	o__Bacteroidales	f__Prevotellaceae	g__Prevotella	s__
4450025	1	4	5	128	0.18917	0.00324373	2.46461	0.310777	0.911263	-3.66893	3.32113	4.40989	0.000651001	0.00946632	k__Bacteria	p__Firmicutes	c__Clostridia	o__Clostridiales	f__Lachnospiraceae	g__	s__
110842	8	6	425	30	2.14148	0.278254	19.7663	0.659443	1	8.68492	-3.31366	-3.41289	4.20207e-06	0.000865626	k__Bacteria	p__Firmicutes	c__Clostridia	o__Clostridiales	f__	g__	s__
520840	1	5	2	78	0.132389	0.00231856	1.59493	0.148607	0.649564	-0.584104	3.31292	0.964196	6.26465e-05	0.00351959	k__Bacteria	p__Firmicutes	c__Clostridia	o__Clostridiales	f__Ruminococcaceae	g__	s__
938672	6	7	10	330	0.697652	0.0894908	5.09207	1	1	3.57912	3.30688	-2.43353	8.87153e-05	0.00404717	k__Bacteria	p__Bacteroidetes	c__Bacteroidia	o__Bacteroidales	f__Prevotellaceae	g__Prevotella	s__
New.ReferenceOTU169	1	5	2	184	0.132389	0.00231856	1.59493	0.148607	0.649564	1.5867	3.29924	-1.15034	0.0015905	0.0147809	k__Bacteria	p__Firmicutes	c__Clostridia	o__Clostridiales	f__Lachnospiraceae	g__	s__
343831	7	3	28	213	4.32144	0.578124	42.0474	0.198381	0.710647	-2.8586	3.27218	4.50879	0.000730328	0.0100298	k__Bacteria	p__Firmicutes	c__Clostridia	o__Clostridiales	f__	g__	s__
301715	6	0	48	0	Inf	1.67464	Inf	0.0123839	0.34042	10.8011	-3.26784	-8.06249	0.00072389	0.0100298	k__Bacteria	p__Firmicutes	c__Clostridia	o__Clostridiales	f__	g__	s__
566022	4	6	4	143	0.492895	0.0621606	3.48788	0.669921	1	-2.82559	3.25561	3.5162	4.44829e-05	0.00312922	k__Bacteria	p__Firmicutes	c__Clostridia	o__Clostridiales	f__	g__	s__
22466	6	10	17	1046	0.132389	0.00231856	1.59493	0.148607	0.649564	-0.861912	3.17401	2.22904	0.00133303	0.0136167	k__Bacteria	p__Bacteroidetes	c__Bacteroidia	o__Bacteroidales	f__Prevotellaceae	g__Prevotella	s__
New.ReferenceOTU2243	6	7	6	199	0.697652	0.0894908	5.09207	1	1	-3.53867	3.15968	4.24702	0.000112761	0.00404717	k__Bacteria	p__Firmicutes	c__Clostridia	o__Clostridiales	f__Ruminococcaceae	g__Oscillospira	s__
New.ReferenceOTU1715	1	5	2	114	0.132389	0.00231856	1.59493	0.148607	0.649564	-6.1623	3.11645	6.32578	0.00063244	0.00941802	k__Bacteria	p__Firmicutes	c__Clostridia	o__Clostridiales	f__	g__	s__
574038	0	8	0	120	0	0	0.298425	0.00103199	0.239358	-0.927027	3.10551	0.91077	0.000746217	0.0101354	k__Bacteria	p__Firmicutes	c__Clostridia	o__Clostridiales	f__	g__	s__
New.ReferenceOTU1276	4	4	7	49	1	0.126361	7.91382	1	1	-2.5802	3.06938	3.645	3.32311e-05	0.00300317	k__Bacteria	p__Firmicutes	c__Clostridia	o__Clostridiales	f__Ruminococcaceae	g__Oscillospira	s__
344284	3	0	60	0	Inf	0.440065	Inf	0.214286	0.710647	-2.37075	-3.06819	6.2607	0.00550338	0.0278778	k__Bacteria	p__Firmicutes	c__Clostridia	o__Clostridiales	f__	g__	s__
New.ReferenceOTU2057	3	0	27	0	Inf	0.440065	Inf	0.214286	0.710647	2.66184	-3.04597	0.432016	0.00176815	0.0150308	k__Bacteria	p__Bacteroidetes	c__Bacteroidia	o__Bacteroidales	f__Bacteroidaceae	g__Bacteroides	s__fragilis
New.ReferenceOTU1523	0	2	0	15	0	0	5.24114	0.47619	1	-0.632394	3.04564	0.649224	0.000433739	0.0076586	k__Bacteria	p__Firmicutes	c__Clostridia	o__Clostridiales	f__Ruminococcaceae	g__Ruminococcus	s__
514521	0	7	0	196	0	0	0.422165	0.00386997	0.239358	3.41945	3.03947	-3.35322	0.00292867	0.019673	k__Bacteria	p__Bacteroidetes	c__Bacteroidia	o__Bacteroidales	f__[Paraprevotellaceae]	g__[Prevotella]	s__
581474	10	10	843	174	1	0.0116023	86.1896	1	1	6.70834	-3.03699	-1.39014	0.000803999	0.0104604	k__Bacteria	p__Firmicutes	c__Bacilli	o__Lactobacillales	f__Lactobacillaceae	g__Lactobacillus	s__
291493	10	4	217	7	14.9954	1.29564	859.552	0.0237358	0.344472	7.21978	-2.96279	-3.36568	0.000103732	0.00404717	k__Bacteria	p__Firmicutes	c__Clostridia	o__Clostridiales	f__Lachnospiraceae	g__	s__
292544	0	4	0	87	0	0	1.32125	0.0902256	0.466983	2.39088	2.96077	-2.34635	0.00176891	0.0150308	k__Bacteria	p__Firmicutes	c__Clostridia	o__Clostridiales	f__	g__	s__
1062061	11	11	1628	476	0	0	Inf	1	1	5.31935	-2.93087	1.70841	0.000309917	0.0063843	k__Bacteria	p__Firmicutes	c__Clostridia	o__Clostridiales	f__Ruminococcaceae	g__	s__
521200	0	4	0	228	0	0	1.32125	0.0902256	0.466983	8.06072	2.92244	-7.89186	0.0038711	0.0231144	k__Bacteria	p__Firmicutes	c__Clostridia	o__Clostridiales	f__Veillonellaceae	g__Anaerovibrio	s__
335516	1	6	4	192	0.0941933	0.00165826	1.09548	0.0634675	0.466983	4.99988	2.89869	-4.28744	0.00148493	0.0142277	k__Bacteria	p__Firmicutes	c__Clostridia	o__Clostridiales	f__Ruminococcaceae	g__	s__
322895	11	10	3060	1005	Inf	0.0256407	Inf	1	1	9.05815	-2.89373	-1.25944	0.00182889	0.0151068	k__Bacteria	p__Firmicutes	c__Clostridia	o__Clostridiales	f__Ruminococcaceae	g__	s__
700540	1	5	1	62	0.132389	0.00231856	1.59493	0.148607	0.649564	-5.59446	2.87178	5.76441	0.000251383	0.00577431	k__Bacteria	p__Firmicutes	c__Clostridia	o__Clostridiales	f__	g__	s__
336501	1	7	1	126	0.0666871	0.0011634	0.77182	0.0237358	0.344472	-2.73876	2.87104	2.95045	0.000835966	0.0107631	k__Bacteria	p__Firmicutes	c__Clostridia	o__Clostridiales	f__	g__	s__
4373060	0	4	0	41	0	0	1.32125	0.0902256	0.466983	-4.98081	2.86497	4.87576	0.000411365	0.00736881	k__Bacteria	p__Firmicutes	c__Clostridia	o__Clostridiales	f__	g__	s__
New.ReferenceOTU2369	2	2	54	9	1	0.059902	16.6939	1	1	-6.13001	-2.83544	10.2591	0.00469763	0.0255783	Unassigned	NA	NA	NA	NA	NA	NA
New.CleanUp.ReferenceOTU18377	0	6	0	53	0	0	0.597142	0.0123839	0.34042	-5.00598	2.82448	4.89268	0.000211962	0.00534662	k__Bacteria	p__Bacteroidetes	c__Bacteroidia	o__Bacteroidales	f__[Paraprevotellaceae]	g__Paraprevotella	s__
987581	7	10	152	1666	0.18917	0.00324373	2.46461	0.310777	0.911263	7.64552	2.81025	-4.36157	0.00301702	0.0200721	k__Bacteria	p__Bacteroidetes	c__Bacteroidia	o__Bacteroidales	f__Prevotellaceae	g__Prevotella	s__
New.ReferenceOTU831	0	1	0	6	0	0	39.0005	1	1	-1.04358e-05	2.80733	1.07589e-05	0.00887478	0.0394577	k__Bacteria	p__Proteobacteria	c__Alphaproteobacteria	o__RF32	f__	g__	s__
New.ReferenceOTU1717	4	9	7	130	0.141516	0.00994106	1.19202	0.0804954	0.466983	-4.56717	2.80084	5.18529	8.79363e-06	0.00120766	k__Bacteria	p__Firmicutes	c__Clostridia	o__Clostridiales	f__Lachnospiraceae	g__	s__
New.CleanUp.ReferenceOTU15288	4	6	17	1555	0.492895	0.0621606	3.48788	0.669921	1	4.86995	2.80042	-3.17327	0.0131339	0.0498516	k__Bacteria	p__Bacteroidetes	c__Bacteroidia	o__Bacteroidales	f__Prevotellaceae	g__Prevotella	s__
701221	5	11	11	809	0	0	0.597142	0.0123839	0.34042	5.06542	2.79682	-3.74926	0.00528659	0.0274241	k__Bacteria	p__Firmicutes	c__Clostridia	o__Clostridiales	f__Lachnospiraceae	g__Roseburia	s__
196191	0	5	0	46	0	0	0.864193	0.0350877	0.344472	-0.756411	2.79451	0.743115	0.000514318	0.00840516	k__Bacteria	p__Firmicutes	c__Clostridia	o__Clostridiales	f__Ruminococcaceae	g__Oscillospira	s__
525914	2	4	3	130	0.406124	0.0286546	3.84059	0.635117	1	-4.6945	2.79357	5.25247	0.00245649	0.018181	k__Bacteria	p__Firmicutes	c__Clostridia	o__Clostridiales	f__Ruminococcaceae	g__	s__
24271	2	3	3	20	0.606866	0.0406658	6.80248	1	1	-4.14971	2.79107	5.24566	0.00174602	0.0150308	k__Bacteria	p__Firmicutes	c__Bacilli	o__Lactobacillales	f__Lactobacillaceae	g__Lactobacillus	NA
956050	6	10	40	3104	0.132389	0.00231856	1.59493	0.148607	0.649564	12.7386	2.78797	-9.68248	0.00685018	0.0327927	k__Bacteria	p__Bacteroidetes	c__Bacteroidia	o__Bacteroidales	f__Prevotellaceae	g__Prevotella	s__
580934	11	7	1458	123	Inf	0.756858	Inf	0.0902256	0.466983	1.18931	-2.78431	4.40468	0.00335622	0.0213829	k__Bacteria	p__Spirochaetes	c__Spirochaetes	o__Spirochaetales	f__Spirochaetaceae	g__Treponema	s__
366633	5	6	6	117	0.706131	0.0955538	4.95181	1	1	1.69473	2.76607	-0.83623	7.25869e-05	0.00362229	k__Bacteria	p__Firmicutes	c__Clostridia	o__Clostridiales	f__Ruminococcaceae	g__Oscillospira	s__
294246	0	5	0	126	0	0	0.864193	0.0350877	0.344472	-3.09888	2.75662	3.04282	0.0053939	0.0276633	k__Bacteria	p__Firmicutes	c__Clostridia	o__Clostridiales	f__Ruminococcaceae	g__	s__
New.ReferenceOTU172	7	6	20	186	1.43338	0.196384	11.1743	1	1	-1.65747	2.75063	3.15577	0.000391498	0.00722227	k__Bacteria	p__Firmicutes	c__Clostridia	o__Clostridiales	f__	g__	s__
348897	7	4	277	23	2.90271	0.407568	24.4537	0.394856	0.911263	2.45513	-2.73314	1.90031	0.00183335	0.0151068	k__Bacteria	p__Firmicutes	c__Clostridia	o__Clostridiales	f__	g__	s__
New.ReferenceOTU2278	3	7	4	102	0.231405	0.0237827	1.72973	0.198381	0.710647	-1.05111	2.72901	1.62842	0.000854311	0.0107748	k__Bacteria	p__Bacteroidetes	c__Bacteroidia	o__Bacteroidales	f__RF16	g__	s__
New.ReferenceOTU364	0	6	0	50	0	0	0.597142	0.0123839	0.34042	0.715658	2.72636	-0.702874	0.000320917	0.00639763	k__Bacteria	p__Firmicutes	c__Clostridia	o__Clostridiales	f__Ruminococcaceae	g__Oscillospira	s__
343443	11	11	947	7116	0	0	Inf	1	1	-1.68743	2.69642	6.77885	0.010224	0.0429541	k__Bacteria	p__Bacteroidetes	c__Bacteroidia	o__Bacteroidales	f__Prevotellaceae	g__Prevotella	s__
New.ReferenceOTU1022	0	7	0	74	0	0	0.422165	0.00386997	0.239358	3.43613	2.68782	-3.37401	0.000627689	0.00941802	k__Bacteria	p__Bacteroidetes	c__Bacteroidia	o__Bacteroidales	f__S24-7	g__	s__
New.ReferenceOTU1936	2	7	2	139	0.141516	0.00994106	1.19202	0.0804954	0.466983	-3.24659	2.67088	3.48913	0.00178947	0.0150308	k__Bacteria	p__Bacteroidetes	c__Bacteroidia	o__Bacteroidales	f__Prevotellaceae	g__Prevotella	s__
288106	4	1	40	104	5.28626	0.405744	308.287	0.310777	0.911263	-12.4619	2.66951	14.9511	0.00530289	0.0274241	k__Bacteria	p__Fibrobacteres	c__Fibrobacteria	o__Fibrobacterales	f__Fibrobacteraceae	g__Fibrobacter	s__succinogenes
591671	5	7	13	139	0.492895	0.0621606	3.48788	0.669921	1	-2.61745	2.6394	3.70484	0.00104956	0.0122128	k__Bacteria	p__Firmicutes	c__Clostridia	o__Clostridiales	f__Lachnospiraceae	g__Dorea	s__
1625448	8	3	119	3	6.40687	0.820093	69.2058	0.0861089	0.466983	7.00809	-2.63892	-3.86648	0.000257922	0.00577431	k__Bacteria	p__Firmicutes	c__Clostridia	o__Clostridiales	f__Clostridiaceae	g__	s__
4466706	3	1	43	3	3.53774	0.23115	215.848	0.586466	1	3.68049	-2.63741	-0.398937	0.0068716	0.0327927	k__Bacteria	p__Firmicutes	c__Clostridia	o__Clostridiales	f__Ruminococcaceae	g__	s__
515590	7	3	113	5	4.32144	0.578124	42.0474	0.198381	0.710647	5.73834	-2.63123	-2.32995	0.000483369	0.00830232	k__Bacteria	p__Bacteroidetes	c__Bacteroidia	o__Bacteroidales	f__	g__	s__
523064	0	4	0	37	0	0	1.32125	0.0902256	0.466983	-6.03131	2.62612	5.89761	0.000688206	0.00966617	k__Bacteria	p__Firmicutes	c__Clostridia	o__Clostridiales	f__Lachnospiraceae	g__	s__
352647	1	5	1	61	0.132389	0.00231856	1.59493	0.148607	0.649564	-1.63244	2.62422	1.82661	0.00114651	0.0128826	k__Bacteria	p__Firmicutes	c__Clostridia	o__Clostridiales	f__Ruminococcaceae	g__	s__
536754	4	5	6	96	0.697652	0.0894908	5.09207	1	1	1.55481	2.62409	-0.704527	0.000487157	0.00830232	k__Bacteria	p__Firmicutes	c__Bacilli	o__Lactobacillales	f__Lactobacillaceae	g__Lactobacillus	s__reuteri
335884	5	2	73	3	3.5236	0.404275	48.8332	0.361455	0.911263	7.35749	-2.61487	-4.01945	0.00104099	0.0122128	k__Bacteria	p__Firmicutes	c__Clostridia	o__Clostridiales	f__Christensenellaceae	g__	s__
New.ReferenceOTU2372	11	10	2561	586	Inf	0.0256407	Inf	1	1	10.1035	-2.61212	-3.04105	0.00440164	0.0246704	k__Bacteria	p__Firmicutes	c__Clostridia	o__Clostridiales	f__Christensenellaceae	g__	s__
309873	9	2	93	2	16.649	1.72532	293.149	0.00892219	0.34042	-1.43978	-2.60972	4.36495	2.48778e-05	0.00256241	k__Bacteria	p__Firmicutes	c__Clostridia	o__Clostridiales	f__	g__	s__
New.ReferenceOTU651	3	6	3	83	0.330345	0.0354397	2.45991	0.386997	0.911263	0.682636	2.60782	-0.101543	0.000305844	0.0063843	k__Bacteria	p__Firmicutes	c__Clostridia	o__Clostridiales	f__Ruminococcaceae	g__	s__
New.ReferenceOTU2331	10	9	552	38	2.1446	0.0959818	143.849	1	1	4.3956	-2.60114	0.15724	0.00117875	0.0130083	k__Bacteria	p__Bacteroidetes	c__Bacteroidia	o__Bacteroidales	f__Porphyromonadaceae	g__Paludibacter	s__
44827	1	5	1	58	0.132389	0.00231856	1.59493	0.148607	0.649564	1.96798	2.59715	-1.74867	0.000853293	0.0107748	k__Bacteria	p__Firmicutes	c__Clostridia	o__Clostridiales	f__Ruminococcaceae	g__Ruminococcus	s__flavefaciens
522595	0	5	0	84	0	0	0.864193	0.0350877	0.344472	-2.31445	2.58888	2.27352	0.00471832	0.0255783	k__Bacteria	p__Bacteroidetes	c__Bacteroidia	o__Bacteroidales	f__Bacteroidaceae	g__Bacteroides	s__
539202	11	7	1208	133	Inf	0.756858	Inf	0.0902256	0.466983	3.717	-2.58303	2.09875	0.00133178	0.0136167	k__Bacteria	p__Firmicutes	c__Clostridia	o__Clostridiales	f__Ruminococcaceae	g__	s__
4452051	3	1	33	1	3.53774	0.23115	215.848	0.586466	1	0.594468	-2.5764	2.5708	0.00337589	0.0213979	k__Bacteria	p__Firmicutes	c__Clostridia	o__Clostridiales	f__Lachnospiraceae	g__	s__
513445	0	4	0	173	0	0	1.32125	0.0902256	0.466983	6.73562	2.55358	-6.59402	0.0129883	0.0498516	k__Bacteria	p__Bacteroidetes	c__Bacteroidia	o__Bacteroidales	f__Bacteroidaceae	g__Bacteroides	s__
New.ReferenceOTU1868	0	2	0	19	0	0	5.24114	0.47619	1	-3.80833	2.55118	3.93716	0.00349681	0.0217189	k__Bacteria	p__Firmicutes	c__Clostridia	o__Clostridiales	f__Ruminococcaceae	g__Ruminococcus	s__
356180	5	3	83	4	2.14148	0.278254	19.7663	0.659443	1	5.26088	-2.54805	-2.00377	0.000554352	0.00856474	k__Bacteria	p__Firmicutes	c__Clostridia	o__Clostridiales	f__	g__	s__
525698	9	1	74	1	33.9762	2.66177	2119.9	0.00190522	0.239358	4.13979	-2.53533	-1.33118	0.000102669	0.00404717	k__Bacteria	p__Firmicutes	c__Clostridia	o__Clostridiales	f__Ruminococcaceae	g__	s__
New.ReferenceOTU427	11	7	1107	152	Inf	0.756858	Inf	0.0902256	0.466983	0.207766	-2.5346	5.42209	0.00555243	0.0279557	k__Bacteria	p__Firmicutes	c__Clostridia	o__Clostridiales	f__Ruminococcaceae	g__	s__
New.ReferenceOTU502	4	7	4	88	0.344506	0.0408936	2.45358	0.394856	0.911263	0.29519	2.51092	0.36752	0.000166154	0.00457136	k__Bacteria	p__Firmicutes	c__Clostridia	o__Clostridiales	f__Lachnospiraceae	g__Coprococcus	s__
355246	3	3	94	10	1	0.100646	9.93577	1	1	11.0238	-2.49972	-7.93215	0.00367259	0.0225394	k__Bacteria	p__Bacteroidetes	c__Bacteroidia	o__Bacteroidales	f__[Odoribacteraceae]	g__Butyricimonas	s__
305187	11	9	1000	142	Inf	0.190798	Inf	0.47619	1	7.48902	-2.48631	-1.76771	0.00171498	0.0150308	k__Bacteria	p__Firmicutes	c__Clostridia	o__Clostridiales	f__	g__	s__
641783	11	10	2466	625	Inf	0.0256407	Inf	1	1	8.84659	-2.48521	-1.22785	0.000232171	0.00562674	k__Bacteria	p__Firmicutes	c__Clostridia	o__Clostridiales	f__Ruminococcaceae	g__	s__
278609	0	4	0	40	0	0	1.32125	0.0902256	0.466983	-2.8473	2.47008	2.79711	0.00349318	0.0217189	k__Bacteria	p__Firmicutes	c__Clostridia	o__Clostridiales	f__Ruminococcaceae	g__Oscillospira	s__
373928	6	6	19	159	1	0.138669	7.21144	1	1	0.881906	2.44035	0.746146	0.00105726	0.0122128	k__Bacteria	p__Firmicutes	c__Clostridia	o__Clostridiales	f__	g__	s__
New.ReferenceOTU1596	0	4	0	36	0	0	1.32125	0.0902256	0.466983	-4.81022	2.43638	4.69775	0.00143444	0.0142277	k__Bacteria	p__Firmicutes	c__Clostridia	o__Clostridiales	f__Lachnospiraceae	g__	s__
20799	0	5	0	66	0	0	0.864193	0.0350877	0.344472	1.78861	2.42282	-1.75676	0.00483774	0.0259597	k__Bacteria	p__Firmicutes	c__Clostridia	o__Clostridiales	f__	g__	s__
New.ReferenceOTU131	11	3	109	4	Inf	3.35093	Inf	0.00103199	0.239358	7.12507	-2.42034	-4.21132	0.000881029	0.0108895	k__Bacteria	p__Bacteroidetes	c__Bacteroidia	o__Bacteroidales	f__Bacteroidaceae	g__Bacteroides	s__
New.ReferenceOTU1821	4	4	13	57	1	0.126361	7.91382	1	1	-2.5463	2.41262	3.77785	0.00051932	0.00840516	k__Bacteria	p__Bacteroidetes	c__Bacteroidia	o__Bacteroidales	f__Prevotellaceae	g__Prevotella	s__
854151	6	3	130	8	3.02714	0.406519	28.217	0.386997	0.911263	11.6151	-2.41179	-7.66871	0.000669571	0.00951253	k__Bacteria	p__Firmicutes	c__Clostridia	o__Clostridiales	f__	g__	s__
New.ReferenceOTU918	0	5	0	47	0	0	0.864193	0.0350877	0.344472	1.32559	2.40443	-1.30212	0.00170829	0.0150308	k__Bacteria	p__Firmicutes	c__Clostridia	o__Clostridiales	f__Lachnospiraceae	g__	s__
68838	2	5	8	170	0.283801	0.0204779	2.47356	0.361455	0.911263	-8.20727	2.39899	8.6317	0.00377909	0.0227851	k__Bacteria	p__Bacteroidetes	c__Bacteroidia	o__Bacteroidales	f__Prevotellaceae	g__Prevotella	s__
370217	10	7	292	10	5.28626	0.405744	308.287	0.310777	0.911263	6.80578	-2.38447	-3.25027	0.000757999	0.0101836	k__Bacteria	p__Firmicutes	c__Clostridia	o__Clostridiales	f__Christensenellaceae	g__	s__
528692	10	6	110	367	7.5535	0.626987	431.301	0.148607	0.649564	3.46919	2.38374	-0.612792	0.00195217	0.0155705	k__Bacteria	p__Firmicutes	c__Clostridia	o__Clostridiales	f__Lachnospiraceae	g__	s__
28970	10	11	721	5202	0	0	39.0005	1	1	10.2591	2.37754	-4.72045	0.00258185	0.0185055	k__Bacteria	p__Bacteroidetes	c__Bacteroidia	o__Bacteroidales	f__Prevotellaceae	g__Prevotella	s__
324326	0	7	0	42	0	0	0.422165	0.00386997	0.239358	-0.851216	2.34623	0.836188	0.00079061	0.0104604	k__Bacteria	p__Firmicutes	c__Clostridia	o__Clostridiales	f__Ruminococcaceae	g__Oscillospira	s__
359984	5	11	22	170	0	0	0.597142	0.0123839	0.34042	1.10598	2.34073	0.266886	0.000543694	0.00850641	k__Bacteria	p__Firmicutes	c__Clostridia	o__Clostridiales	f__Ruminococcaceae	g__	s__
772972	9	7	405	49	2.4623	0.260377	34.8984	0.635117	1	-2.99479	-2.33014	7.3848	0.00132283	0.0136167	k__Bacteria	p__Firmicutes	c__Clostridia	o__Clostridiales	f__	g__	s__
New.ReferenceOTU121	6	6	10	97	1	0.138669	7.21144	1	1	-5.6368	2.32549	6.30489	0.000166433	0.00457136	k__Bacteria	p__Spirochaetes	c__Spirochaetes	o__Spirochaetales	f__Spirochaetaceae	g__Treponema	s__
541602	2	4	2	60	0.406124	0.0286546	3.84059	0.635117	1	4.71456	2.32089	-4.10839	0.00168025	0.0150308	k__Bacteria	p__Firmicutes	c__Clostridia	o__Clostridiales	f__Lachnospiraceae	g__	s__
364085	2	7	5	109	0.141516	0.00994106	1.19202	0.0804954	0.466983	-4.67047	2.31629	5.16156	0.00143189	0.0142277	k__Bacteria	p__Firmicutes	c__Clostridia	o__Clostridiales	f__Clostridiaceae	g__Clostridium	s__
340923	3	5	4	141	0.466966	0.0505911	3.59385	0.659443	1	-6.41962	2.30979	6.76386	0.00485169	0.0259597	k__Bacteria	p__Firmicutes	c__Clostridia	o__Clostridiales	f__Ruminococcaceae	g__Ruminococcus	s__
45921	10	11	925	3253	0	0	39.0005	1	1	4.22999	2.30878	1.51622	0.000211008	0.00534662	k__Bacteria	p__Bacteroidetes	c__Bacteroidia	o__Bacteroidales	f__Bacteroidaceae	g__Bacteroides	s__
661758	0	4	0	30	0	0	1.32125	0.0902256	0.466983	-5.62739	2.30388	5.50674	0.0018915	0.0153809	k__Bacteria	p__Spirochaetes	c__Spirochaetes	o__Spirochaetales	f__Spirochaetaceae	g__Treponema	s__
208949	2	3	55	11	0.606866	0.0406658	6.80248	1	1	5.1766	-2.30241	-1.04075	0.0117138	0.0462563	k__Bacteria	p__Bacteroidetes	c__Bacteroidia	o__Bacteroidales	f__Bacteroidaceae	g__Bacteroides	s__
New.ReferenceOTU2301	3	7	3	83	0.231405	0.0237827	1.72973	0.198381	0.710647	0.402547	2.29722	0.172118	0.00126233	0.0135673	k__Bacteria	p__Firmicutes	c__Clostridia	o__Clostridiales	f__Ruminococcaceae	g__Oscillospira	s__
531867	11	10	33	404	Inf	0.0256407	Inf	1	1	-0.159367	2.2848	1.9931	0.00133253	0.0136167	k__Bacteria	p__Firmicutes	c__Clostridia	o__Clostridiales	f__Ruminococcaceae	g__	s__
353214	8	2	92	5	10.4037	1.18968	157.527	0.0299731	0.344472	8.86413	-2.28439	-5.98107	0.00512886	0.0270872	k__Bacteria	p__Firmicutes	c__Clostridia	o__Clostridiales	f__	g__	s__
644244	11	11	5943	1507	0	0	Inf	1	1	9.3972	-2.28193	-0.573492	0.000133117	0.00421878	k__Bacteria	p__Firmicutes	c__Clostridia	o__Clostridiales	f__Christensenellaceae	g__	s__
548699	7	6	32	219	1.43338	0.196384	11.1743	1	1	3.68056	2.27783	-1.86833	0.00261098	0.0185055	k__Bacteria	p__Proteobacteria	c__Epsilonproteobacteria	o__Campylobacterales	f__Helicobacteraceae	g__	s__
337057	8	2	101	3	10.4037	1.18968	157.527	0.0299731	0.344472	4.36735	-2.2733	-1.53587	0.00659062	0.0316965	k__Bacteria	p__Firmicutes	c__Clostridia	o__Clostridiales	f__Christensenellaceae	g__	s__
187492	10	11	631	101	0	0	39.0005	1	1	9.75852	-2.26982	-4.90095	0.00634795	0.0306487	k__Bacteria	p__Firmicutes	c__Clostridia	o__Clostridiales	f__Christensenellaceae	g__	s__
New.ReferenceOTU2672	4	2	32	104	2.4623	0.260377	34.8984	0.635117	1	-9.62104	2.26866	11.3656	0.00429503	0.0243964	k__Bacteria	p__Bacteroidetes	c__Bacteroidia	o__Bacteroidales	f__[Paraprevotellaceae]	g__CF231	s__
516576	2	3	2	34	0.606866	0.0406658	6.80248	1	1	-4.35074	2.26566	4.65791	0.00152163	0.0143615	k__Bacteria	p__Firmicutes	c__Clostridia	o__Clostridiales	f__Lachnospiraceae	g__	s__
589071	2	6	2	196	0.201219	0.0144806	1.69444	0.182663	0.710647	10.8539	2.25815	-10.5105	0.00316764	0.0204984	k__Bacteria	p__Bacteroidetes	c__Bacteroidia	o__Bacteroidales	f__Bacteroidaceae	g__Bacteroides	s__uniformis
52212	1	5	1	110	0.132389	0.00231856	1.59493	0.148607	0.649564	0.615334	2.25001	-0.340471	0.00918366	0.0404471	k__Bacteria	p__Bacteroidetes	c__Bacteroidia	o__Bacteroidales	f__[Paraprevotellaceae]	g__Paraprevotella	s__
514242	1	6	1	70	0.0941933	0.00165826	1.09548	0.0634675	0.466983	3.37145	2.24771	-2.97066	0.00216463	0.0169334	k__Bacteria	p__Firmicutes	c__Clostridia	o__Clostridiales	f__Clostridiaceae	g__Clostridium	s__
New.ReferenceOTU354	1	4	3	47	0.18917	0.00324373	2.46461	0.310777	0.911263	-3.26246	2.24683	3.84356	0.00267355	0.0186695	k__Bacteria	p__Firmicutes	c__Clostridia	o__Clostridiales	f__Ruminococcaceae	g__Oscillospira	s__
708680	9	10	75	386	0.466287	0.00695174	10.4186	1	1	3.38241	2.24339	-1.04661	0.00251877	0.0183575	k__Bacteria	p__Firmicutes	c__Clostridia	o__Clostridiales	f__Lachnospiraceae	g__Roseburia	s__
274299	1	2	2	47	0.466287	0.00695174	10.4186	1	1	-5.80834	2.23542	5.9929	0.00856789	0.0385088	k__Bacteria	p__Spirochaetes	c__Spirochaetes	o__Spirochaetales	f__Spirochaetaceae	g__Treponema	s__
531773	3	9	5	134	0.0961195	0.00634813	0.840562	0.0299731	0.344472	-0.059117	2.21714	0.857714	0.00195261	0.0155705	k__Bacteria	p__Firmicutes	c__Clostridia	o__Clostridiales	f__Lachnospiraceae	g__	s__
24175	2	6	2	55	0.201219	0.0144806	1.69444	0.182663	0.710647	0.50486	2.2082	-0.05829	0.00166258	0.0150308	k__Bacteria	p__Firmicutes	c__Clostridia	o__Clostridiales	f__	g__	s__
309745	0	4	0	70	0	0	1.32125	0.0902256	0.466983	-0.0729956	2.20517	0.0717121	0.0107828	0.0442776	k__Bacteria	p__Firmicutes	c__Clostridia	o__Clostridiales	f__Ruminococcaceae	g__	s__
302975	3	4	4	80	0.669	0.071127	5.58908	1	1	-4.97658	2.2026	5.72074	0.00311047	0.0202951	k__Bacteria	p__Firmicutes	c__Bacilli	o__Lactobacillales	f__Lactobacillaceae	g__Lactobacillus	s__
577228	11	11	1976	741	0	0	Inf	1	1	3.42664	-2.20079	3.53369	0.00919549	0.0404471	k__Bacteria	p__Bacteroidetes	c__Bacteroidia	o__Bacteroidales	f__S24-7	g__	s__
296406	11	7	1452	326	Inf	0.756858	Inf	0.0902256	0.466983	4.46325	-2.19758	1.90194	0.0127427	0.0490655	k__Bacteria	p__Spirochaetes	c__Spirochaetes	o__Spirochaetales	f__Spirochaetaceae	g__Treponema	s__
25562	2	4	19	119	0.406124	0.0286546	3.84059	0.635117	1	-7.35364	2.19151	8.80956	0.00725002	0.0340723	k__Bacteria	p__Proteobacteria	c__Betaproteobacteria	o__Tremblayales	f__	g__	s__
308912	11	10	296	71	Inf	0.0256407	Inf	1	1	5.76699	-2.18985	-1.13695	0.000114809	0.00404717	k__Bacteria	p__Firmicutes	c__Clostridia	o__Clostridiales	f__Christensenellaceae	g__	s__
New.CleanUp.ReferenceOTU2592	6	6	16	90	1	0.138669	7.21144	1	1	-3.65776	2.18828	4.61903	0.00224339	0.0171153	k__Bacteria	p__Bacteroidetes	c__Bacteroidia	o__Bacteroidales	f__Prevotellaceae	g__Prevotella	s__
295100	6	3	41	4	3.02714	0.406519	28.217	0.386997	0.911263	6.67419	-2.18462	-3.77999	0.000124428	0.00404717	k__Bacteria	p__Firmicutes	c__Clostridia	o__Clostridiales	f__Christensenellaceae	g__	s__
97263	0	5	0	30	0	0	0.864193	0.0350877	0.344472	1.36897	2.18449	-1.34444	0.00179981	0.0150308	k__Bacteria	p__Firmicutes	c__Clostridia	o__Clostridiales	f__Ruminococcaceae	g__	s__
New.ReferenceOTU1788	2	2	4	20	1	0.059902	16.6939	1	1	-4.1077	2.18066	4.76228	0.00263509	0.0185055	k__Bacteria	p__Proteobacteria	c__Alphaproteobacteria	o__RF32	f__	g__	s__
New.ReferenceOTU2259	5	8	8	205	0.330345	0.0354397	2.45991	0.386997	0.911263	4.45505	2.18031	-3.25757	0.00148475	0.0142277	k__Bacteria	p__Firmicutes	c__Clostridia	o__Clostridiales	f__Lachnospiraceae	g__	s__
365496	4	6	224	48	0.492895	0.0621606	3.48788	0.669921	1	10.1355	-2.18018	-5.79512	0.00849865	0.038337	k__Bacteria	p__Bacteroidetes	c__Bacteroidia	o__Bacteroidales	f__Bacteroidaceae	g__Bacteroides	s__plebeius
194360	1	6	1	71	0.0941933	0.00165826	1.09548	0.0634675	0.466983	3.09689	2.17401	-2.77068	0.0045341	0.0251307	k__Bacteria	p__Proteobacteria	c__Betaproteobacteria	o__Burkholderiales	f__Alcaligenaceae	g__Sutterella	s__
New.ReferenceOTU2324	5	3	81	19	2.14148	0.278254	19.7663	0.659443	1	6.21489	-2.17097	-2.67182	0.00399013	0.0233106	k__Bacteria	p__Tenericutes	c__RF3	o__ML615J-28	f__	g__	s__
632932	5	2	32	2	3.5236	0.404275	48.8332	0.361455	0.911263	3.45447	-2.16814	-0.78671	0.000661867	0.00951241	k__Bacteria	p__Firmicutes	c__Clostridia	o__Clostridiales	f__	g__	s__
New.ReferenceOTU1165	1	4	2	46	0.18917	0.00324373	2.46461	0.310777	0.911263	-2.22167	2.15879	2.5446	0.0054614	0.0278778	k__Bacteria	p__Bacteroidetes	c__Bacteroidia	o__Bacteroidales	f__Prevotellaceae	g__Prevotella	s__
528782	11	10	1235	461	Inf	0.0256407	Inf	1	1	2.81406	-2.15861	3.58179	0.00522868	0.0273411	k__Bacteria	p__Firmicutes	c__Clostridia	o__Clostridiales	f__	g__	s__
287635	2	4	6	112	0.406124	0.0286546	3.84059	0.635117	1	-7.63494	2.14533	8.2493	0.0101173	0.0428254	k__Bacteria	p__Firmicutes	c__Clostridia	o__Clostridiales	f__Ruminococcaceae	g__	s__
New.ReferenceOTU807	8	2	45	2	10.4037	1.18968	157.527	0.0299731	0.344472	5.19696	-2.13997	-2.68129	0.000490348	0.00830232	k__Bacteria	p__Bacteroidetes	c__Bacteroidia	o__Bacteroidales	f__Bacteroidaceae	g__Bacteroides	s__
888914	11	7	1884	467	Inf	0.756858	Inf	0.0902256	0.466983	11.328	-2.1396	-4.40453	0.00347865	0.0217189	k__Bacteria	p__Firmicutes	c__Clostridia	o__Clostridiales	f__Christensenellaceae	g__	s__
New.ReferenceOTU2476	8	3	14	106	6.40687	0.820093	69.2058	0.0861089	0.466983	-0.501616	2.1374	1.85836	0.0031198	0.0202951	k__Bacteria	p__Firmicutes	c__Clostridia	o__Clostridiales	f__Ruminococcaceae	g__	s__
New.CleanUp.ReferenceOTU11931	0	4	0	24	0	0	1.32125	0.0902256	0.466983	-1.45821	2.1209	1.43166	0.00303594	0.0200721	k__Bacteria	p__Bacteroidetes	c__Bacteroidia	o__Bacteroidales	f__Prevotellaceae	g__Prevotella	s__
359750	0	7	0	40	0	0	0.422165	0.00386997	0.239358	0.720391	2.11153	-0.707133	0.00249362	0.0183459	k__Bacteria	p__Firmicutes	c__Clostridia	o__Clostridiales	f__Clostridiaceae	g__Clostridium	NA
819181	11	7	687	101	Inf	0.756858	Inf	0.0902256	0.466983	6.49808	-2.11084	-1.30735	0.00755627	0.0349796	k__Bacteria	p__Firmicutes	c__Clostridia	o__Clostridiales	f__Ruminococcaceae	g__	s__
530061	6	9	20	147	0.283801	0.0204779	2.47356	0.361455	0.911263	1.52078	2.10057	0.0178694	0.00114416	0.0128826	k__Bacteria	p__Firmicutes	c__Clostridia	o__Clostridiales	f__Clostridiaceae	g__Clostridium	s__
1654477	3	7	7	341	0.231405	0.0237827	1.72973	0.198381	0.710647	9.52043	2.09765	-8.18466	0.00595014	0.0293705	k__Bacteria	p__Fusobacteria	c__Fusobacteriia	o__Fusobacteriales	f__Fusobacteriaceae	g__Fusobacterium	s__
572130	10	6	248	32	7.5535	0.626987	431.301	0.148607	0.649564	5.44716	-2.09675	-1.42257	0.00395092	0.0233106	k__Bacteria	p__Firmicutes	c__Clostridia	o__Clostridiales	f__	g__	s__
New.ReferenceOTU1279	0	5	0	30	0	0	0.864193	0.0350877	0.344472	-4.57148	2.09425	4.4643	0.00186931	0.0153011	k__Bacteria	p__Bacteroidetes	c__Bacteroidia	o__Bacteroidales	f__[Paraprevotellaceae]	g__[Prevotella]	s__
561171	10	1	98	2	63.0128	4.10712	4517.63	0.000345887	0.239358	0.00716327	-2.09129	2.72404	0.0054946	0.0278778	k__Bacteria	p__Firmicutes	c__Clostridia	o__Clostridiales	f__Lachnospiraceae	g__	s__
351927	11	9	1116	394	Inf	0.190798	Inf	0.47619	1	6.27762	-2.08841	0.215434	0.00368476	0.0225394	k__Bacteria	p__Firmicutes	c__Clostridia	o__Clostridiales	f__Ruminococcaceae	g__	s__
311390	2	7	2	44	0.141516	0.00994106	1.19202	0.0804954	0.466983	-1.88585	2.07216	2.34858	0.000160294	0.00457136	k__Bacteria	p__Firmicutes	c__Clostridia	o__Clostridiales	f__Lachnospiraceae	g__Coprococcus	s__
921813	10	10	70	277	1	0.0116023	86.1896	1	1	1.42695	2.03321	1.18684	6.84721e-05	0.00362229	k__Bacteria	p__Bacteroidetes	c__Bacteroidia	o__Bacteroidales	f__Porphyromonadaceae	g__Parabacteroides	s__
New.ReferenceOTU1677	8	2	111	2	10.4037	1.18968	157.527	0.0299731	0.344472	5.72103	-2.02865	-3.25904	0.00509649	0.0270355	k__Bacteria	p__Bacteroidetes	c__Bacteroidia	o__Bacteroidales	f__Bacteroidaceae	g__Bacteroides	s__
302670	11	6	406	88	Inf	1.15715	Inf	0.0350877	0.344472	2.59433	-2.01751	2.29241	0.0025249	0.0183575	k__Bacteria	p__Spirochaetes	c__Spirochaetes	o__Spirochaetales	f__Spirochaetaceae	g__Treponema	s__
New.ReferenceOTU455	2	7	2	177	0.141516	0.00994106	1.19202	0.0804954	0.466983	5.65316	2.00105	-5.06579	0.00941533	0.04069	k__Bacteria	p__Bacteroidetes	c__Bacteroidia	o__Bacteroidales	f__Prevotellaceae	g__Prevotella	s__
356167	3	8	4	119	0.156082	0.0144496	1.21937	0.0861089	0.466983	1.14957	1.99927	-0.432767	0.00934287	0.0406019	k__Bacteria	p__Firmicutes	c__Clostridia	o__Clostridiales	f__Ruminococcaceae	g__	s__
174153	1	6	1	42	0.0941933	0.00165826	1.09548	0.0634675	0.466983	-0.241809	1.99805	0.484833	0.00399826	0.0233106	k__Bacteria	p__Firmicutes	c__Clostridia	o__Clostridiales	f__Lachnospiraceae	g__	s__
43544	10	11	263	1153	0	0	39.0005	1	1	-1.61352	1.98471	5.39045	0.0119468	0.0470264	k__Bacteria	p__Bacteroidetes	c__Bacteroidia	o__Bacteroidales	f__Prevotellaceae	g__Prevotella	s__
1035392	11	10	494	88	Inf	0.0256407	Inf	1	1	6.83206	-1.98051	-2.34993	0.00568981	0.0284721	k__Bacteria	p__Firmicutes	c__Clostridia	o__Clostridiales	f__Ruminococcaceae	g__	s__
958505	11	9	1297	423	Inf	0.190798	Inf	0.47619	1	5.32929	-1.98017	1.13752	0.00721131	0.0340198	k__Bacteria	p__Firmicutes	c__Clostridia	o__Clostridiales	f__Ruminococcaceae	g__	s__
New.ReferenceOTU392	3	3	10	19	1	0.100646	9.93577	1	1	-7.21872	1.98004	8.09503	0.00121884	0.0133317	k__Bacteria	p__Firmicutes	c__Clostridia	o__Clostridiales	f__Ruminococcaceae	g__Oscillospira	s__
544734	6	5	20	150	1.41617	0.201946	10.4653	1	1	-7.07298	1.97151	8.05699	0.00952955	0.0408977	k__Bacteria	p__Firmicutes	c__Clostridia	o__Clostridiales	f__Ruminococcaceae	g__	s__
New.ReferenceOTU895	2	4	2	89	0.406124	0.0286546	3.84059	0.635117	1	-7.36751	1.96908	7.40402	0.00842507	0.0381443	k__Bacteria	p__Firmicutes	c__Clostridia	o__Clostridiales	f__Lachnospiraceae	NA	NA
New.ReferenceOTU1767	10	5	194	22	10.6165	0.912843	603.043	0.0634675	0.466983	4.64504	-1.96362	-0.962276	0.0039401	0.0233106	k__Bacteria	p__Firmicutes	c__Clostridia	o__Clostridiales	f__	g__	s__
318928	7	9	21	204	0.406124	0.0286546	3.84059	0.635117	1	-2.53128	1.96137	4.14058	0.00164394	0.0150308	k__Bacteria	p__Firmicutes	c__Clostridia	o__Clostridiales	f__Ruminococcaceae	g__Ruminococcus	s__
New.ReferenceOTU124	10	5	122	11	10.6165	0.912843	603.043	0.0634675	0.466983	3.34706	-1.95763	-0.177497	0.00227096	0.0171153	k__Bacteria	p__Firmicutes	c__Clostridia	o__Clostridiales	f__	g__	s__
New.ReferenceOTU474	1	7	1	37	0.0666871	0.0011634	0.77182	0.0237358	0.344472	-0.148425	1.95201	0.404676	0.00177874	0.0150308	k__Bacteria	p__Bacteroidetes	c__Bacteroidia	o__Bacteroidales	f__Bacteroidaceae	g__Bacteroides	s__
4315471	1	3	2	31	0.282665	0.0046329	4.3262	0.586466	1	-6.90769	1.94554	7.99105	0.00574556	0.0286352	k__Bacteria	p__Firmicutes	c__Clostridia	o__Clostridiales	f__Ruminococcaceae	g__Ruminococcus	s__
New.ReferenceOTU643	3	6	6	109	0.330345	0.0354397	2.45991	0.386997	0.911263	-3.83293	1.94411	4.57815	0.00926677	0.0405082	k__Bacteria	p__Firmicutes	c__Clostridia	o__Clostridiales	f__Lachnospiraceae	g__Dorea	s__
354622	1	7	1	47	0.0666871	0.0011634	0.77182	0.0237358	0.344472	-2.79808	1.93975	2.94308	0.00342819	0.0216186	k__Bacteria	p__Firmicutes	c__Clostridia	o__Clostridiales	f__Lachnospiraceae	g__Coprococcus	s__
318366	9	7	389	45	2.4623	0.260377	34.8984	0.635117	1	0.532845	-1.92675	3.80159	0.0106053	0.0436937	k__Bacteria	p__Firmicutes	c__Clostridia	o__Clostridiales	f__Ruminococcaceae	g__	s__
940433	3	5	3	25	0.466966	0.0505911	3.59385	0.659443	1	-1.58786	1.92239	2.02847	0.000254107	0.00577431	k__Bacteria	p__Bacteroidetes	c__Bacteroidia	o__Bacteroidales	f__S24-7	g__	s__
530854	9	3	154	11	10.4037	1.18968	157.527	0.0299731	0.344472	-0.904657	-1.91198	4.02662	0.00494455	0.0263425	k__Bacteria	p__Bacteroidetes	c__Bacteroidia	o__Bacteroidales	f__Prevotellaceae	g__Prevotella	s__
292458	5	5	6	73	1	0.138669	7.21144	1	1	-3.46569	1.8922	4.19368	0.00356341	0.0220219	k__Bacteria	p__Spirochaetes	c__Spirochaetes	o__Spirochaetales	f__Spirochaetaceae	g__Treponema	s__
New.ReferenceOTU2661	11	6	315	64	Inf	1.15715	Inf	0.0350877	0.344472	4.16543	-1.88991	0.50546	0.0014578	0.0142277	k__Bacteria	p__Firmicutes	c__Clostridia	o__Clostridiales	f__Ruminococcaceae	g__	s__
New.ReferenceOTU319	2	9	5	110	0.0600635	0.00341124	0.579601	0.00892219	0.34042	4.21312	1.86616	-3.30724	0.00485095	0.0259597	Unassigned	NA	NA	NA	NA	NA	NA
461487	9	4	185	31	7.06635	0.838913	100.593	0.0804954	0.466983	1.7611	-1.86029	2.30142	0.00427654	0.0243964	k__Bacteria	p__Firmicutes	c__Clostridia	o__Clostridiales	f__	g__	s__
583958	9	6	101	24	3.5236	0.404275	48.8332	0.361455	0.911263	3.43983	-1.85568	-0.0253979	0.000644342	0.00946632	k__Bacteria	p__Firmicutes	c__Clostridia	o__Clostridiales	f__Lachnospiraceae	NA	NA
New.ReferenceOTU1887	3	10	3	72	0.0458803	0.000778864	0.544737	0.0075188	0.34042	0.299926	1.85524	0.262027	0.00371496	0.0225394	k__Bacteria	p__Firmicutes	c__Clostridia	o__Clostridiales	f__Ruminococcaceae	g__Oscillospira	s__
307900	9	3	56	5	10.4037	1.18968	157.527	0.0299731	0.344472	1.60166	-1.8525	1.0851	0.000107885	0.00404717	k__Bacteria	p__Firmicutes	c__Clostridia	o__Clostridiales	f__Ruminococcaceae	g__	s__
New.ReferenceOTU2486	6	5	7	37	1.41617	0.201946	10.4653	1	1	2.24306	1.84943	-1.37824	0.000266291	0.00577431	k__Bacteria	p__Firmicutes	c__Clostridia	o__Clostridiales	f__Ruminococcaceae	g__Oscillospira	s__
581003	5	1	37	3	7.5535	0.626987	431.301	0.148607	0.649564	2.80578	-1.84559	-0.436893	0.00810575	0.0369694	k__Bacteria	p__Firmicutes	c__Clostridia	o__Clostridiales	f__	g__	s__
106258	3	6	6	36	0.330345	0.0354397	2.45991	0.386997	0.911263	-1.59828	1.84518	2.34074	0.00105299	0.0122128	k__Bacteria	p__Firmicutes	c__Clostridia	o__Clostridiales	f__	g__	s__
331417	6	8	18	101	0.466966	0.0505911	3.59385	0.659443	1	-2.73315	1.84277	4.14625	0.0037201	0.0225394	k__Bacteria	p__Firmicutes	c__Clostridia	o__Clostridiales	f__[Mogibacteriaceae]	g__	s__
738351	10	11	80	332	0	0	39.0005	1	1	1.95695	1.834	0.806054	0.000898329	0.0109934	k__Bacteria	p__Firmicutes	c__Clostridia	o__Clostridiales	f__Ruminococcaceae	g__	s__
721569	11	9	65	322	Inf	0.190798	Inf	0.47619	1	3.63769	1.81489	-1.17217	0.00628085	0.0304436	k__Bacteria	p__Firmicutes	c__Clostridia	o__Clostridiales	f__Ruminococcaceae	g__	s__
333380	0	8	0	46	0	0	0.298425	0.00103199	0.239358	3.84092	1.81474	-3.76275	0.00515007	0.0270872	k__Bacteria	p__Proteobacteria	c__Betaproteobacteria	o__Burkholderiales	f__Alcaligenaceae	g__Sutterella	s__
New.ReferenceOTU2575	11	9	814	209	Inf	0.190798	Inf	0.47619	1	5.45463	-1.80718	0.250407	0.0109305	0.0444409	k__Bacteria	p__Spirochaetes	c__Spirochaetes	o__Spirochaetales	f__Spirochaetaceae	g__Treponema	s__
28056	5	10	21	176	0.0941933	0.00165826	1.09548	0.0634675	0.466983	0.690151	1.80688	0.867023	0.0126491	0.0490103	k__Bacteria	p__Bacteroidetes	c__Bacteroidia	o__Bacteroidales	f__Bacteroidaceae	g__Bacteroides	s__
22371	3	8	4	100	0.156082	0.0144496	1.21937	0.0861089	0.466983	2.95006	1.79702	-2.24374	0.0120656	0.0471958	k__Bacteria	p__Firmicutes	c__Clostridia	o__Clostridiales	f__Lachnospiraceae	g__	s__
New.CleanUp.ReferenceOTU6807	7	0	20	0	Inf	2.36874	Inf	0.00386997	0.239358	1.18671	-1.79034	0.618915	0.000530422	0.00840516	k__Bacteria	p__Bacteroidetes	c__Bacteroidia	o__Bacteroidales	f__S24-7	g__	s__
New.ReferenceOTU1136	9	10	150	557	0.466287	0.00695174	10.4186	1	1	-3.46211	1.76333	6.73411	0.00840491	0.0381443	k__Bacteria	p__Bacteroidetes	c__Bacteroidia	o__Bacteroidales	f__[Paraprevotellaceae]	g__	s__
New.CleanUp.ReferenceOTU26749	11	9	117	268	Inf	0.190798	Inf	0.47619	1	0.822127	1.76246	1.81405	0.0114623	0.0460122	k__Bacteria	p__Firmicutes	c__Clostridia	o__Clostridiales	f__Lachnospiraceae	g__	s__
353173	11	8	244	61	Inf	0.440065	Inf	0.214286	0.710647	5.88388	-1.76007	-1.60844	0.00221261	0.0169862	k__Bacteria	p__Firmicutes	c__Clostridia	o__Clostridiales	f__Ruminococcaceae	g__	s__
360890	5	1	21	1	7.5535	0.626987	431.301	0.148607	0.649564	5.14104	-1.75808	-3.22377	0.00990079	0.0421381	k__Bacteria	p__Firmicutes	c__Clostridia	o__Clostridiales	f__	g__	s__
40523	3	5	15	50	0.466966	0.0505911	3.59385	0.659443	1	-8.14604	1.75591	8.70445	0.0027663	0.0188903	k__Bacteria	p__Bacteroidetes	c__Bacteroidia	o__Bacteroidales	f__	g__	s__
360808	4	4	5	31	1	0.126361	7.91382	1	1	0.744099	1.75236	0.0586992	0.00237237	0.0176641	k__Bacteria	p__Firmicutes	c__Clostridia	o__Clostridiales	f__Ruminococcaceae	g__	s__
New.ReferenceOTU2115	2	5	2	45	0.283801	0.0204779	2.47356	0.361455	0.911263	-0.784627	1.74497	1.16338	0.0116436	0.0462563	k__Bacteria	p__Bacteroidetes	c__Bacteroidia	o__Bacteroidales	f__Prevotellaceae	g__Prevotella	s__
New.ReferenceOTU1509	6	3	15	28	3.02714	0.406519	28.217	0.386997	0.911263	-2.43279	1.74287	3.71309	0.0021269	0.0168261	k__Bacteria	p__Firmicutes	c__Clostridia	o__Clostridiales	f__Lachnospiraceae	g__Epulopiscium	s__
New.ReferenceOTU1494	3	5	6	34	0.466966	0.0505911	3.59385	0.659443	1	-3.77059	1.74159	4.56206	0.0021373	0.0168261	k__Bacteria	p__Firmicutes	c__Clostridia	o__Clostridiales	f__Ruminococcaceae	g__Oscillospira	s__
New.ReferenceOTU1620	5	11	13	129	0	0	0.597142	0.0123839	0.34042	2.36597	1.73264	-0.885004	0.00261399	0.0185055	k__Bacteria	p__Firmicutes	c__Clostridia	o__Clostridiales	f__Lachnospiraceae	g__	s__
222930	7	9	72	221	0.406124	0.0286546	3.84059	0.635117	1	2.90528	1.73121	-0.22474	0.00430293	0.0243964	k__Bacteria	p__Bacteroidetes	c__Bacteroidia	o__Bacteroidales	f__Prevotellaceae	g__Prevotella	s__
544996	5	8	8	72	0.330345	0.0354397	2.45991	0.386997	0.911263	-0.205134	1.72969	1.14591	0.00331714	0.0212435	k__Bacteria	p__Firmicutes	c__Clostridia	o__Clostridiales	f__Ruminococcaceae	g__Oscillospira	s__
New.ReferenceOTU2704	10	11	82	396	0	0	39.0005	1	1	4.68033	1.72885	-1.66259	0.000979664	0.011756	k__Bacteria	p__Bacteroidetes	c__Bacteroidia	o__Bacteroidales	f__	g__	s__
607825	6	3	95	9	3.02714	0.406519	28.217	0.386997	0.911263	-4.38709	-1.72107	7.24436	0.00460299	0.0253987	k__Bacteria	p__Firmicutes	c__Clostridia	o__Clostridiales	f__	g__	s__
303269	8	2	30	23	10.4037	1.18968	157.527	0.0299731	0.344472	4.51883	1.71854	-2.57974	0.00865455	0.0387573	k__Bacteria	p__Firmicutes	c__Clostridia	o__Clostridiales	f__	g__	s__
New.ReferenceOTU2468	5	6	254	72	0.706131	0.0955538	4.95181	1	1	-10.0955	-1.71485	13.8935	0.00235469	0.0176387	k__Bacteria	p__Firmicutes	c__Clostridia	o__Clostridiales	f__	g__	s__
New.CleanUp.ReferenceOTU21859	5	2	21	2	3.5236	0.404275	48.8332	0.361455	0.911263	1.01295	-1.71274	1.27624	0.00124521	0.0135007	k__Bacteria	p__Firmicutes	c__Clostridia	o__Clostridiales	f__	g__	s__
4426266	2	5	2	45	0.283801	0.0204779	2.47356	0.361455	0.911263	2.07897	1.7108	-1.62895	0.00992087	0.0421381	k__Bacteria	p__Bacteroidetes	c__Bacteroidia	o__Bacteroidales	f__Bacteroidaceae	g__Bacteroides	s__
New.ReferenceOTU728	7	2	48	9	7.06635	0.838913	100.593	0.0804954	0.466983	2.22189	-1.7065	0.463779	0.005564	0.0279557	k__Bacteria	p__Firmicutes	c__Clostridia	o__Clostridiales	f__	g__	s__
199226	1	5	1	33	0.132389	0.00231856	1.59493	0.148607	0.649564	-0.838256	1.70033	1.1034	0.0102401	0.0429541	k__Bacteria	p__Firmicutes	c__Clostridia	o__Clostridiales	f__Ruminococcaceae	g__	s__
New.ReferenceOTU2599	9	4	59	5	7.06635	0.838913	100.593	0.0804954	0.466983	-1.31287	-1.69891	3.81609	0.000798958	0.0104604	k__Bacteria	p__Firmicutes	c__Clostridia	o__Clostridiales	f__	g__	s__
New.CleanUp.ReferenceOTU20710	6	9	8	82	0.283801	0.0204779	2.47356	0.361455	0.911263	0.714761	1.69803	0.240407	0.00584536	0.0290155	k__Bacteria	p__Firmicutes	c__Clostridia	o__Clostridiales	f__Lachnospiraceae	g__	s__
342543	0	5	0	27	0	0	0.864193	0.0350877	0.344472	-1.61178	1.69542	1.58208	0.011681	0.0462563	k__Bacteria	p__Firmicutes	c__Clostridia	o__Clostridiales	f__Ruminococcaceae	g__	s__
New.ReferenceOTU773	8	9	19	100	0.606866	0.0406658	6.80248	1	1	-3.8339	1.67866	5.29256	0.000348894	0.00673802	k__Bacteria	p__Firmicutes	c__Clostridia	o__Clostridiales	f__Lachnospiraceae	g__Coprococcus	s__
302809	11	10	152	40	Inf	0.0256407	Inf	1	1	3.1229	-1.66885	0.578796	0.000144418	0.00435367	k__Bacteria	p__Firmicutes	c__Clostridia	o__Clostridiales	f__Ruminococcaceae	g__	s__
443620	7	5	46	8	2.02883	0.286707	16.0874	0.669921	1	3.98475	-1.65764	-1.37853	0.00175854	0.0150308	k__Bacteria	p__Firmicutes	c__Clostridia	o__Clostridiales	f__Ruminococcaceae	g__Oscillospira	s__
312916	7	5	12	62	2.02883	0.286707	16.0874	0.669921	1	-1.30174	1.65164	2.37801	0.00441114	0.0246704	k__Bacteria	p__Proteobacteria	c__Gammaproteobacteria	o__Aeromonadales	f__Succinivibrionaceae	g__Succinivibrio	s__
309285	10	9	165	31	2.1446	0.0959818	143.849	1	1	1.01157	-1.6478	2.54728	0.000370641	0.00694143	k__Bacteria	p__Firmicutes	c__Clostridia	o__Clostridiales	f__	g__	s__
316587	4	7	9	44	0.344506	0.0408936	2.45358	0.394856	0.911263	-3.44657	1.63616	4.20986	0.00397041	0.0233106	k__Bacteria	p__Firmicutes	c__Bacilli	o__Lactobacillales	f__Streptococcaceae	g__Streptococcus	s__
New.ReferenceOTU2091	5	2	24	3	3.5236	0.404275	48.8332	0.361455	0.911263	2.19562	-1.63506	0.207123	0.010369	0.0431519	k__Bacteria	p__Firmicutes	c__Clostridia	o__Clostridiales	f__	g__	s__
New.ReferenceOTU1493	6	8	29	114	0.466966	0.0505911	3.59385	0.659443	1	-4.60013	1.63408	6.05346	0.0102859	0.0429541	k__Bacteria	p__Firmicutes	c__Clostridia	o__Clostridiales	f__Ruminococcaceae	g__Oscillospira	s__
New.ReferenceOTU2298	6	2	43	5	4.96992	0.590167	69.0579	0.182663	0.710647	0.314761	-1.63291	2.08537	0.007612	0.0351061	k__Bacteria	p__Firmicutes	c__Erysipelotrichi	o__Erysipelotrichales	f__Erysipelotrichaceae	g__RFN20	s__
New.CleanUp.ReferenceOTU16311	4	7	9	45	0.344506	0.0408936	2.45358	0.394856	0.911263	-3.35944	1.6314	4.26072	0.00269884	0.0187403	k__Bacteria	p__Bacteroidetes	c__Bacteroidia	o__Bacteroidales	f__Prevotellaceae	g__Prevotella	s__
1522739	3	7	4	39	0.231405	0.0237827	1.72973	0.198381	0.710647	-0.389443	1.62617	1.05496	0.00310062	0.0202951	k__Bacteria	p__Firmicutes	c__Clostridia	o__Clostridiales	f__Clostridiaceae	g__	s__
353336	8	3	69	10	6.40687	0.820093	69.2058	0.0861089	0.466983	3.90073	-1.6079	-1.10984	0.00880188	0.0392748	k__Bacteria	p__Firmicutes	c__Clostridia	o__Clostridiales	f__	g__	s__
70067	5	2	23	2	3.5236	0.404275	48.8332	0.361455	0.911263	-0.10086	-1.57749	2.06775	0.0032216	0.0207391	k__Bacteria	p__Firmicutes	c__Clostridia	o__Clostridiales	f__Lachnospiraceae	g__Blautia	s__producta
New.ReferenceOTU2268	0	5	0	18	0	0	0.864193	0.0350877	0.344472	3.44398	1.57625	-3.37436	0.0059644	0.0293705	Unassigned	NA	NA	NA	NA	NA	NA
547348	9	5	68	9	4.96992	0.590167	69.0579	0.182663	0.710647	2.74869	-1.57239	-0.0407287	0.00177781	0.0150308	k__Bacteria	p__Firmicutes	c__Clostridia	o__Clostridiales	f__Ruminococcaceae	g__	s__
290957	9	7	135	28	2.4623	0.260377	34.8984	0.635117	1	-0.463654	-1.55872	3.82149	0.00537251	0.0276633	k__Bacteria	p__Firmicutes	c__Clostridia	o__Clostridiales	f__Ruminococcaceae	g__	s__
302880	5	4	6	30	1.43338	0.196384	11.1743	1	1	-4.38674	1.55012	4.94456	0.004706	0.0255783	k__Bacteria	p__Firmicutes	c__Bacilli	o__Lactobacillales	f__Streptococcaceae	g__Streptococcus	s__
New.ReferenceOTU1463	4	6	16	70	0.492895	0.0621606	3.48788	0.669921	1	-2.80004	1.54758	4.05389	0.0120663	0.0471958	k__Bacteria	p__Bacteroidetes	c__Bacteroidia	o__Bacteroidales	f__Bacteroidaceae	g__Bacteroides	s__
New.ReferenceOTU2582	3	6	6	31	0.330345	0.0354397	2.45991	0.386997	0.911263	-1.01804	1.53465	2.01929	0.00285115	0.0193627	k__Bacteria	p__Firmicutes	c__Clostridia	o__Clostridiales	f__Clostridiaceae	g__	s__
279534	3	3	5	11	1	0.100646	9.93577	1	1	-3.77355	1.52849	4.3403	0.002628	0.0185055	k__Bacteria	p__Firmicutes	c__Clostridia	o__Clostridiales	f__Ruminococcaceae	g__	s__
305261	8	8	84	29	1	0.100646	9.93577	1	1	2.0098	-1.52153	1.3405	0.00147907	0.0142277	k__Bacteria	p__Firmicutes	c__Clostridia	o__Clostridiales	f__	g__	s__
168068	5	1	21	1	7.5535	0.626987	431.301	0.148607	0.649564	0.502133	-1.5184	1.27281	0.00798811	0.0365678	k__Bacteria	p__Firmicutes	c__Clostridia	o__Clostridiales	f__Ruminococcaceae	g__	s__
New.ReferenceOTU1095	5	9	9	59	0.201219	0.0144806	1.69444	0.182663	0.710647	-0.971409	1.51774	1.98261	0.00417981	0.024029	k__Bacteria	p__Firmicutes	c__Clostridia	o__Clostridiales	f__	g__	s__
844589	5	4	24	6	1.43338	0.196384	11.1743	1	1	5.81678	-1.51706	-3.74583	0.00936209	0.0406019	k__Bacteria	p__Bacteroidetes	c__Bacteroidia	o__Bacteroidales	f__S24-7	g__	s__
335267	11	6	1103	232	Inf	1.15715	Inf	0.0350877	0.344472	9.44039	-1.51246	-2.95756	0.00176994	0.0150308	k__Bacteria	p__Firmicutes	c__Clostridia	o__Clostridiales	f__	g__	s__
1110312	11	7	273	93	Inf	0.756858	Inf	0.0902256	0.466983	1.4402	-1.51137	3.0574	0.00439111	0.0246704	k__Bacteria	p__Firmicutes	c__Clostridia	o__Clostridiales	f__	g__	s__
301464	5	3	31	6	2.14148	0.278254	19.7663	0.659443	1	-0.696092	-1.50524	3.29361	0.00303679	0.0200721	k__Bacteria	p__Firmicutes	c__Clostridia	o__Clostridiales	f__	g__	s__
New.CleanUp.ReferenceOTU3403	3	8	3	29	0.156082	0.0144496	1.21937	0.0861089	0.466983	-0.492655	1.48567	1.06168	0.000865861	0.0108101	k__Bacteria	p__Firmicutes	c__Clostridia	o__Clostridiales	f__Ruminococcaceae	g__Oscillospira	s__
New.ReferenceOTU703	11	8	168	63	Inf	0.440065	Inf	0.214286	0.710647	9.06885	-1.4781	-5.26683	0.00154511	0.0144679	k__Bacteria	p__Firmicutes	c__Clostridia	o__Clostridiales	f__	g__	s__
68837	10	11	201	584	0	0	39.0005	1	1	0.937481	1.47603	3.01413	0.00273794	0.0188716	k__Bacteria	p__Spirochaetes	c__Spirochaetes	o__Spirochaetales	f__Spirochaetaceae	g__Treponema	s__
New.ReferenceOTU2386	4	7	11	65	0.344506	0.0408936	2.45358	0.394856	0.911263	0.547021	1.46816	0.70302	0.0111893	0.045196	k__Bacteria	p__Bacteroidetes	c__Bacteroidia	o__Bacteroidales	f__Bacteroidaceae	g__Bacteroides	s__
11235	11	11	154	382	0	0	Inf	1	1	-1.35369	1.46518	4.69318	0.00403505	0.0234147	k__Bacteria	p__Proteobacteria	c__Epsilonproteobacteria	o__Campylobacterales	f__Campylobacteraceae	g__Campylobacter	s__
591540	2	7	3	28	0.141516	0.00994106	1.19202	0.0804954	0.466983	-1.18002	1.43598	1.67208	0.00610779	0.0298389	k__Bacteria	p__Firmicutes	c__Clostridia	o__Clostridiales	f__Lachnospiraceae	g__Coprococcus	s__
New.ReferenceOTU2123	2	3	8	16	0.606866	0.0406658	6.80248	1	1	-4.76405	1.43222	5.54743	0.0115835	0.0461846	k__Bacteria	p__Firmicutes	c__Clostridia	o__Clostridiales	f__Lachnospiraceae	g__	s__
556422	6	4	24	4	2.02883	0.286707	16.0874	0.669921	1	1.96271	-1.40912	0.286555	0.00090977	0.0110243	k__Bacteria	p__Firmicutes	c__Clostridia	o__Clostridiales	f__Ruminococcaceae	g__	s__
New.ReferenceOTU1261	2	7	6	25	0.141516	0.00994106	1.19202	0.0804954	0.466983	-3.50528	1.38286	4.22377	0.00381451	0.0228871	k__Bacteria	p__Bacteroidetes	c__Bacteroidia	o__Bacteroidales	f__Prevotellaceae	g__Prevotella	s__
1832447	9	8	67	16	1.64781	0.147005	24.5907	1	1	3.5757	-1.38154	-0.815083	0.00220526	0.0169862	k__Bacteria	p__Spirochaetes	c__Spirochaetes	o__Sphaerochaetales	f__Sphaerochaetaceae	g__Sphaerochaeta	s__
New.ReferenceOTU1098	3	7	8	44	0.231405	0.0237827	1.72973	0.198381	0.710647	3.41103	1.38081	-2.36364	0.01246	0.0484295	k__Bacteria	p__Bacteroidetes	c__Bacteroidia	o__Bacteroidales	f__Prevotellaceae	g__Prevotella	s__
111237	9	9	34	104	1	0.059902	16.6939	1	1	-2.79466	1.37508	4.68141	0.00130743	0.0136167	k__Bacteria	p__Firmicutes	c__Clostridia	o__Clostridiales	f__Ruminococcaceae	g__	s__
New.ReferenceOTU1884	11	8	223	84	Inf	0.440065	Inf	0.214286	0.710647	4.28367	-1.36208	-0.0257266	0.00733249	0.0343294	k__Bacteria	p__Spirochaetes	c__Spirochaetes	o__Spirochaetales	f__Spirochaetaceae	g__Treponema	s__
New.ReferenceOTU2329	11	11	169	624	0	0	Inf	1	1	5.98674	1.35304	-1.98426	0.0011437	0.0128826	k__Bacteria	p__Firmicutes	c__Clostridia	o__Clostridiales	f__Ruminococcaceae	g__Oscillospira	s__
New.ReferenceOTU763	7	8	20	73	0.669	0.071127	5.58908	1	1	2.04344	1.34564	-0.409615	0.01087	0.0443412	k__Bacteria	p__Bacteroidetes	c__Bacteroidia	o__Bacteroidales	f__Porphyromonadaceae	g__Parabacteroides	s__
New.ReferenceOTU1534	0	4	0	9	0	0	1.32125	0.0902256	0.466983	-3.66128	1.34024	3.58088	0.0131486	0.0498516	k__Bacteria	p__Firmicutes	c__Clostridia	o__Clostridiales	f__Ruminococcaceae	g__	s__
331117	11	6	727	176	Inf	1.15715	Inf	0.0350877	0.344472	9.77855	-1.33737	-3.9454	0.00945726	0.0407288	k__Bacteria	p__Firmicutes	c__Clostridia	o__Clostridiales	f__	g__	s__
New.ReferenceOTU1746	3	4	6	18	0.669	0.071127	5.58908	1	1	-2.70324	1.33131	3.45572	0.0115156	0.0460624	k__Bacteria	p__Firmicutes	c__Clostridia	o__Clostridiales	f__	g__	s__
New.ReferenceOTU1131	9	4	28	32	7.06635	0.838913	100.593	0.0804954	0.466983	-2.49273	1.32975	4.08479	0.0122821	0.0478884	k__Bacteria	p__Bacteroidetes	c__Bacteroidia	o__Bacteroidales	f__	g__	s__
28413	2	7	3	50	0.141516	0.00994106	1.19202	0.0804954	0.466983	5.97045	1.32286	-5.02016	0.00927495	0.0405082	k__Bacteria	p__Bacteroidetes	c__Bacteroidia	o__Bacteroidales	f__Prevotellaceae	g__Prevotella	s__
578588	7	4	43	7	2.90271	0.407568	24.4537	0.394856	0.911263	3.26178	-1.32123	-0.745972	0.00697379	0.0331523	k__Bacteria	p__Firmicutes	c__Clostridia	o__Clostridiales	f__Clostridiaceae	g__	s__
288683	11	10	187	379	Inf	0.0256407	Inf	1	1	0.146025	1.31966	3.43865	0.0114658	0.0460122	k__Bacteria	p__Actinobacteria	c__Coriobacteriia	o__Coriobacteriales	f__Coriobacteriaceae	g__	s__
20439	9	4	30	7	7.06635	0.838913	100.593	0.0804954	0.466983	5.87443	-1.31313	-3.72674	0.00225992	0.0171153	k__Bacteria	p__Firmicutes	c__Clostridia	o__Clostridiales	f__Lachnospiraceae	g__	s__
354957	11	6	1458	373	Inf	1.15715	Inf	0.0350877	0.344472	9.96134	-1.30979	-3.08052	0.00743926	0.0345674	k__Bacteria	p__Firmicutes	c__Clostridia	o__Clostridiales	f__	g__	s__
1029949	10	7	113	38	5.28626	0.405744	308.287	0.310777	0.911263	-0.132986	-1.29761	3.50793	0.00443795	0.0247086	k__Bacteria	p__Firmicutes	c__Clostridia	o__Clostridiales	f__Lachnospiraceae	g__Lachnospira	s__
New.ReferenceOTU1490	8	9	80	29	0.606866	0.0406658	6.80248	1	1	1.48706	-1.25675	1.69316	0.00128828	0.0136167	k__Bacteria	p__Firmicutes	c__Clostridia	o__Clostridiales	f__[Mogibacteriaceae]	g__	s__
1060029	7	8	18	55	0.669	0.071127	5.58908	1	1	-1.72153	1.25248	3.15978	0.00415044	0.0239717	k__Bacteria	p__Actinobacteria	c__Actinobacteria	o__Actinomycetales	f__Corynebacteriaceae	g__Corynebacterium	s__
367946	11	11	226	81	0	0	Inf	1	1	5.95161	-1.25071	-1.86233	0.00617314	0.0300394	k__Bacteria	p__Firmicutes	c__Clostridia	o__Clostridiales	f__Ruminococcaceae	g__	s__
New.ReferenceOTU1873	8	2	27	3	10.4037	1.18968	157.527	0.0299731	0.344472	1.72488	-1.25065	0.121723	0.00894857	0.0396431	k__Bacteria	p__Firmicutes	c__Clostridia	o__Clostridiales	f__	g__	s__
334839	8	3	27	4	6.40687	0.820093	69.2058	0.0861089	0.466983	0.841504	-1.24129	1.14505	0.00219561	0.0169862	k__Bacteria	p__Firmicutes	c__Clostridia	o__Clostridiales	f__Ruminococcaceae	g__	s__
565357	5	9	10	48	0.201219	0.0144806	1.69444	0.182663	0.710647	-0.450755	1.18904	1.59668	0.011184	0.045196	k__Bacteria	p__Firmicutes	c__Clostridia	o__Clostridiales	f__	g__	s__
324244	11	11	586	262	0	0	Inf	1	1	4.52156	-1.1849	1.0963	0.00192101	0.0155187	k__Bacteria	p__Firmicutes	c__Clostridia	o__Clostridiales	f__Ruminococcaceae	g__	s__
185593	8	2	25	2	10.4037	1.18968	157.527	0.0299731	0.344472	-1.18751	-1.1833	2.84372	0.00524259	0.0273411	k__Bacteria	p__Tenericutes	c__Mollicutes	o__Anaeroplasmatales	f__Anaeroplasmataceae	g__	s__
New.ReferenceOTU425	6	10	18	44	0.132389	0.00231856	1.59493	0.148607	0.649564	-3.34429	1.16077	4.55449	0.00172838	0.0150308	k__Bacteria	p__Firmicutes	c__Clostridia	o__Clostridiales	f__Ruminococcaceae	g__	s__
976470	3	7	3	19	0.231405	0.0237827	1.72973	0.198381	0.710647	0.154675	1.15499	0.42652	0.00737636	0.0344044	k__Bacteria	p__Firmicutes	c__Clostridia	o__Clostridiales	f__Lachnospiraceae	g__Coprococcus	s__
New.ReferenceOTU1369	6	7	11	37	0.697652	0.0894908	5.09207	1	1	0.922097	1.11982	0.282519	0.0131054	0.0498516	k__Bacteria	p__Bacteroidetes	c__Bacteroidia	o__Bacteroidales	f__S24-7	g__	s__
New.ReferenceOTU85	9	5	39	7	4.96992	0.590167	69.0579	0.182663	0.710647	4.42875	-1.10923	-2.27936	0.00718105	0.0340068	k__Bacteria	p__Firmicutes	c__Clostridia	o__Clostridiales	f__	g__	s__
New.ReferenceOTU1140	2	7	3	18	0.141516	0.00994106	1.19202	0.0804954	0.466983	-0.306414	1.10704	0.89752	0.00982253	0.0420092	k__Bacteria	p__Bacteroidetes	c__Bacteroidia	o__Bacteroidales	f__Prevotellaceae	g__Prevotella	s__
New.ReferenceOTU434	6	8	15	42	0.466966	0.0505911	3.59385	0.659443	1	-1.22211	1.10073	2.51019	0.0108686	0.0443412	k__Bacteria	p__Firmicutes	c__Clostridia	o__Clostridiales	f__Ruminococcaceae	g__	s__
540532	2	5	2	12	0.283801	0.0204779	2.47356	0.361455	0.911263	-3.10889	1.09902	3.39345	0.0105936	0.0436937	k__Bacteria	p__Firmicutes	c__Clostridia	o__Clostridiales	f__Lachnospiraceae	g__Coprococcus	s__
4315785	7	5	15	32	2.02883	0.286707	16.0874	0.669921	1	-1.80061	1.09817	3.13374	0.0127041	0.0490655	k__Bacteria	p__Firmicutes	c__Clostridia	o__Clostridiales	f__Ruminococcaceae	g__	s__
New.ReferenceOTU1223	7	6	36	12	1.43338	0.196384	11.1743	1	1	-0.398656	-1.09227	2.69463	0.00470465	0.0255783	k__Bacteria	p__Firmicutes	c__Clostridia	o__Clostridiales	f__Ruminococcaceae	g__	s__
340809	9	4	34	7	7.06635	0.838913	100.593	0.0804954	0.466983	-0.419521	-1.0922	2.44975	0.00609299	0.0298389	k__Bacteria	p__Firmicutes	c__Clostridia	o__Clostridiales	f__Ruminococcaceae	g__	s__
300613	9	2	21	3	16.649	1.72532	293.149	0.00892219	0.34042	2.72512	-1.04976	-1.04742	0.0079743	0.0365678	k__Bacteria	p__Firmicutes	c__Clostridia	o__Clostridiales	f__Ruminococcaceae	g__	s__
New.ReferenceOTU2140	9	6	42	12	3.5236	0.404275	48.8332	0.361455	0.911263	0.209919	-1.04152	2.1454	0.00274829	0.0188716	k__Bacteria	p__Firmicutes	c__Clostridia	o__Clostridiales	f__Ruminococcaceae	g__	s__
918187	10	10	20	47	1	0.0116023	86.1896	1	1	2.22342	0.871782	-0.750928	0.0102867	0.0429541	k__Bacteria	p__Bacteroidetes	c__Bacteroidia	o__Bacteroidales	f__Porphyromonadaceae	g__Parabacteroides	s__
