# Supplementary material for: Transport to the Slaughterhouse Affects the Salmonella Shedding and Modifies the Fecal Microbiota of Finishing Pigs
Source: Animals (Basel). 2020 Apr 13;10(4):676. doi: 10.3390/ani10040676 (PMC7222783; doi:10.3390/ani10040676)
Supplement: Supplementary file 1 [file animals-10-00676-s001.zip › Table_S5.xlsx]

## Sheet: Foglio1
Table S5. Differentially abundant OTUs when comparing the sample of the Test 3. We included only Salmonella negative animals in this group. We compared faecal samples collected from the same pig on farm and at the slaughterhouse.
OTU	+samples in group 0	+samples in group 1	counts in group 0	counts in group 1	oddsRatio	lower	upper	fisherP	fisherAdjP	(Intercept)	SamplingSLAUGHTER	normFactor_neg_vs_neg	pvalues	adjPvalues	Kingdom	Phylum	Class	Order	Family	Genus	Species
4466706	3	2	8	41	1.66507	0.167912	22.3397	0.66142	1	1.86474	3.26358	-1.22369	5.78545e-05	0.0178915	k__Bacteria	p__Firmicutes	c__Clostridia	o__Clostridiales	f__Ruminococcaceae	g__	s__
355246	6	0	85	0	Inf	1.47671	Inf	0.00831601	0.561369	2.37351	-3.15747	0.732646	0.000159647	0.017953	k__Bacteria	p__Bacteroidetes	c__Bacteroidia	o__Bacteroidales	f__[Odoribacteraceae]	g__Butyricimonas	s__
New.ReferenceOTU334	4	3	111	66	1.49516	0.214072	11.9077	0.694765	1	-15.4614	-3.00344	20.1978	0.000455356	0.0331339	k__Bacteria	p__Firmicutes	c__Clostridia	o__Clostridiales	f__	g__	s__
589277	7	6	212	8	1.35033	0.293678	6.40571	0.741054	1	4.60232	-2.77242	-0.920778	9.17419e-05	0.017953	k__Bacteria	p__Bacteroidetes	c__Bacteroidia	o__Bacteroidales	f__Bacteroidaceae	g__Bacteroides	s__
325213	8	5	12	85	2.13777	0.463291	10.8397	0.320266	0.975573	2.77412	2.62429	-1.95364	1.51374e-05	0.0128325	k__Bacteria	p__Firmicutes	c__Clostridia	o__Clostridiales	f__	g__	s__
New.ReferenceOTU2057	6	1	66	1	8.32603	0.855871	423.027	0.043596	0.879945	9.51863	-2.51701	-6.60781	2.07477e-05	0.0128325	k__Bacteria	p__Bacteroidetes	c__Bacteroidia	o__Bacteroidales	f__Bacteroidaceae	g__Bacteroides	s__fragilis
581003	6	3	23	10	2.55116	0.441887	18.8037	0.273343	0.975573	-5.15185	-2.37322	7.70385	5.33223e-05	0.0178915	k__Bacteria	p__Firmicutes	c__Clostridia	o__Clostridiales	f__	g__	s__
New.ReferenceOTU364	0	3	0	10	0	0	2.472	0.230769	0.923298	1.1464	2.26086	-1.21076	8.30191e-05	0.017953	k__Bacteria	p__Firmicutes	c__Clostridia	o__Clostridiales	f__Ruminococcaceae	g__Oscillospira	s__
110842	15	12	353	82	2.44125	0.501713	13.9358	0.300845	0.975573	1.70951	-2.05538	2.45337	0.000196934	0.0203006	k__Bacteria	p__Firmicutes	c__Clostridia	o__Clostridiales	f__	g__	s__
354905	1	8	4	55	0.0884659	0.00178741	0.800171	0.019656	0.693958	5.45954	1.96089	-5.44859	0.00052453	0.0360469	k__Bacteria	p__Firmicutes	c__Bacilli	o__Lactobacillales	f__Lactobacillaceae	g__Lactobacillus	s__
New.ReferenceOTU2115	2	7	7	48	0.227043	0.0198512	1.46443	0.127386	0.923298	4.09219	1.92005	-3.66661	0.000276578	0.0263175	k__Bacteria	p__Bacteroidetes	c__Bacteroidia	o__Bacteroidales	f__Prevotellaceae	g__Prevotella	s__
519836	8	4	36	20	2.82822	0.579644	16.2396	0.175996	0.923298	-6.04671	-1.91776	8.48211	0.000129886	0.017953	k__Bacteria	p__Bacteroidetes	c__Bacteroidia	o__Bacteroidales	f__Prevotellaceae	g__Prevotella	s__
New.ReferenceOTU1715	2	9	3	51	0.151284	0.0134963	0.927248	0.0309503	0.879945	1.49325	1.74085	-1.18599	0.000708862	0.0438431	k__Bacteria	p__Firmicutes	c__Clostridia	o__Clostridiales	f__	g__	s__
291493	12	10	124	55	1.69054	0.401059	7.4752	0.523107	1	-1.84563	-1.73107	5.38367	0.000381442	0.0294902	k__Bacteria	p__Firmicutes	c__Clostridia	o__Clostridiales	f__Lachnospiraceae	g__	s__
542934	9	1	31	1	15.8888	1.78126	784.081	0.00334205	0.450395	0.658049	-1.59069	1.04095	0.000307153	0.0271392	k__Bacteria	p__Firmicutes	c__Erysipelotrichi	o__Erysipelotrichales	f__Erysipelotrichaceae	g__	s__
514242	0	5	0	10	0	0	1.03076	0.047124	0.879945	1.19353	1.55535	-1.26156	0.000125439	0.017953	k__Bacteria	p__Firmicutes	c__Clostridia	o__Clostridiales	f__Clostridiaceae	g__Clostridium	s__
New.CleanUp.ReferenceOTU6858	1	6	3	12	0.135919	0.00267882	1.32029	0.0914761	0.923298	4.11689	1.44797	-4.01133	0.000342564	0.0282501	k__Bacteria	p__Bacteroidetes	c__Bacteroidia	o__Bacteroidales	f__Prevotellaceae	g__Prevotella	s__
531773	7	13	8	53	0.324122	0.0692855	1.38191	0.112834	0.923298	3.46346	1.34404	-2.75846	0.000156601	0.017953	k__Bacteria	p__Firmicutes	c__Clostridia	o__Clostridiales	f__Lachnospiraceae	g__	s__
552621	10	12	51	21	0.746497	0.173229	3.14544	0.751186	1	0.0252132	-1.26882	2.37839	0.00013717	0.017953	k__Bacteria	p__Firmicutes	c__Erysipelotrichi	o__Erysipelotrichales	f__Erysipelotrichaceae	g__L7A_E11	s__
295748	11	14	52	25	0.597434	0.127323	2.65945	0.514476	1	1.52619	-1.02863	0.794694	0.000645487	0.0420246	k__Bacteria	p__Firmicutes	c__Clostridia	o__Clostridiales	f__Ruminococcaceae	g__	s__
