# Supplementary material for: Transport to the Slaughterhouse Affects the Salmonella Shedding and Modifies the Fecal Microbiota of Finishing Pigs
Source: Animals (Basel). 2020 Apr 13;10(4):676. doi: 10.3390/ani10040676 (PMC7222783; doi:10.3390/ani10040676)
Supplement: Supplementary file 1 [file animals-10-00676-s001.zip › Table_S6.xlsx]

## Sheet: Foglio1
Table S6. Differentially abundant OTUs when comparing the sample of the Test 4. We included fecal samples collected on farm. We compared the fecal microbiota composition of the pigs which were negative throughout the study with the fecal microbial composition of pigs which became Salmonella positive at slaughterhouse.
OTU	+samples in group 0	+samples in group 1	counts in group 0	counts in group 1	oddsRatio	lower	upper	fisherP	fisherAdjP	(Intercept)	Herd_category_fecesNEG-POS	normFactor_Herd_category_feces	pvalues	adjPvalues	Kingdom	Phylum	Class	Order	Family	Genus	Species
New.ReferenceOTU433	4	2	3946	1231	1.19284	0.136298	15.7199	1	1	1.55862	-4.90688	6.0735	2.38202e-13	1.44707e-10	k__Bacteria	p__Spirochaetes	c__Spirochaetes	o__Spirochaetales	f__Spirochaetaceae	g__Treponema	s__
514045	3	5	6	273	0.238094	0.02763	1.66023	0.103999	1	0.303194	4.48873	0.279425	7.32873e-14	8.9044e-11	k__Bacteria	p__Spirochaetes	c__Spirochaetes	o__Spirochaetales	f__Spirochaetaceae	g__Treponema	s__
344284	1	3	3	60	0.158826	0.00268429	2.32181	0.126437	1	-3.15691	3.26672	3.70382	2.18337e-06	0.000431354	k__Bacteria	p__Firmicutes	c__Clostridia	o__Clostridiales	f__	g__	s__
733799	14	6	491	1963	2.26467	0.368658	14.5597	0.425276	1	8.57947	3.21461	-5.31068	1.88943e-12	7.65219e-10	k__Bacteria	p__Bacteroidetes	c__Bacteroidia	o__Bacteroidales	f__	g__	s__
New.ReferenceOTU2090	4	1	309	855	2.5898	0.212329	144.127	0.626016	1	-24.8171	3.13227	28.5714	4.51674e-05	0.0045732	Unassigned	NA	NA	NA	NA	NA	NA
New.ReferenceOTU2596	5	1	126	1	3.44147	0.310898	185.325	0.371706	1	0.842455	-3.08191	2.70692	3.32392e-06	0.00050482	k__Bacteria	p__Firmicutes	c__Clostridia	o__Clostridiales	f__	g__	s__
208949	5	2	227	55	1.5828	0.200603	20.0368	1	1	22.3317	-2.76717	-18.12	5.911e-05	0.00460825	k__Bacteria	p__Bacteroidetes	c__Bacteroidia	o__Bacteroidales	f__Bacteroidaceae	g__Bacteroides	s__
New.ReferenceOTU2369	3	2	156	54	0.848622	0.080325	11.9544	1	1	1.00732	-2.72501	4.11604	0.000355511	0.0179977	Unassigned	NA	NA	NA	NA	NA	NA
552235	4	5	75	8	0.333556	0.0468336	2.14963	0.225187	1	2.49263	-2.67993	1.20561	8.11652e-06	0.00109573	k__Bacteria	p__Firmicutes	c__Clostridia	o__Clostridiales	f__Christensenellaceae	g__Christensenella	s__
571111	5	5	41	182	0.441566	0.0686826	2.71254	0.425276	1	-7.94547	2.64446	10.4891	2.48517e-06	0.000431354	k__Bacteria	p__Firmicutes	c__Clostridia	o__Clostridiales	f__Ruminococcaceae	g__Ruminococcus	s__flavefaciens
589277	7	3	212	19	1.53318	0.24652	11.9826	0.701995	1	12.5189	-2.60299	-8.93718	2.07841e-05	0.0022957	k__Bacteria	p__Bacteroidetes	c__Bacteroidia	o__Bacteroidales	f__Bacteroidaceae	g__Bacteroides	s__
New.ReferenceOTU2083	6	3	57	100	1.22237	0.188661	9.7308	1	1	-10.7053	2.46864	13.0522	7.55437e-05	0.00539915	k__Bacteria	p__Firmicutes	c__Clostridia	o__Clostridiales	f__Ruminococcaceae	g__	s__
1654477	3	3	34	7	0.512341	0.0549961	4.72256	0.640975	1	0.563101	-2.41292	3.11191	0.00076367	0.0331378	k__Bacteria	p__Fusobacteria	c__Fusobacteriia	o__Fusobacteriales	f__Fusobacteriaceae	g__Fusobacterium	s__
4466706	3	3	8	43	0.512341	0.0549961	4.72256	0.640975	1	-2.93577	2.12343	3.82575	0.000937325	0.0367371	k__Bacteria	p__Firmicutes	c__Clostridia	o__Clostridiales	f__Ruminococcaceae	g__	s__
New.CleanUp.ReferenceOTU8796	17	8	1723	315	3.05607	0.28942	43.5431	0.326828	1	-2.57401	-2.10686	8.09874	1.52236e-07	4.62416e-05	k__Bacteria	p__Bacteroidetes	c__Bacteroidia	o__Bacteroidales	f__Prevotellaceae	g__Prevotella	s__
New.ReferenceOTU121	15	6	191	10	2.99799	0.465197	21.3522	0.225187	1	2.99623	-2.07152	0.172083	1.44464e-06	0.000351048	k__Bacteria	p__Spirochaetes	c__Spirochaetes	o__Spirochaetales	f__Spirochaetaceae	g__Treponema	s__
544243	9	1	53	3	8.41987	0.872546	431.98	0.0485131	1	1.63983	-2.04031	0.910335	0.000268019	0.0155068	k__Bacteria	p__Firmicutes	c__Clostridia	o__Clostridiales	f__[Mogibacteriaceae]	g__	s__
New.ReferenceOTU710	9	6	645	765	0.757254	0.130361	4.21899	1	1	15.6107	1.91314	-12.9049	5.92872e-05	0.00460825	k__Bacteria	p__Spirochaetes	c__Spirochaetes	o__Spirochaetales	f__Spirochaetaceae	g__Treponema	s__
1084045	6	2	92	5	2.02915	0.273889	25.0467	0.672195	1	0.342753	-1.88113	2.26276	0.000805765	0.0332603	k__Bacteria	p__Firmicutes	c__Bacilli	o__Bacillales	f__Planococcaceae	g__	s__
68838	5	2	106	8	1.5828	0.200603	20.0368	1	1	-3.62193	-1.85114	6.58315	0.00108404	0.0399123	k__Bacteria	p__Bacteroidetes	c__Bacteroidia	o__Bacteroidales	f__Prevotellaceae	g__Prevotella	s__
158215	12	2	221	7	7.16613	1.05315	87.1382	0.0258871	1	2.60483	-1.82737	0.211796	0.000532175	0.0258637	k__Bacteria	p__Bacteroidetes	c__Bacteroidia	o__Bacteroidales	f__Bacteroidaceae	g__Bacteroides	s__coprophilus
293621	14	6	631	51	2.26467	0.368658	14.5597	0.425276	1	-3.33457	-1.75471	7.55612	6.06848e-05	0.00460825	k__Bacteria	p__Firmicutes	c__Clostridia	o__Clostridiales	f__Ruminococcaceae	g__	s__
515590	10	7	51	113	0.644594	0.101566	3.63861	0.708426	1	2.11676	1.7199	-0.499097	0.000230655	0.0140123	k__Bacteria	p__Bacteroidetes	c__Bacteroidia	o__Bacteroidales	f__	g__	s__
New.ReferenceOTU1791	6	9	14	74	0.111873	0.00906697	0.771906	0.0209395	1	0.246198	1.6216	0.774857	0.000347209	0.0179977	k__Bacteria	p__Firmicutes	c__Clostridia	o__Clostridiales	f__Lachnospiraceae	g__Coprococcus	s__
516159	8	9	65	414	0.172111	0.014303	1.16417	0.057457	1	0.84226	1.60271	1.30365	0.000323522	0.0178672	k__Bacteria	p__Proteobacteria	c__Gammaproteobacteria	o__Aeromonadales	f__Succinivibrionaceae	g__Succinivibrio	s__
343443	18	11	5032	947	0	0	67.2939	1	1	-2.19039	-1.59512	9.31756	1.47146e-05	0.00178782	k__Bacteria	p__Bacteroidetes	c__Bacteroidia	o__Bacteroidales	f__Prevotellaceae	g__Prevotella	s__
443620	7	7	13	46	0.346413	0.0528899	1.95996	0.256772	1	1.90422	1.56942	-0.919045	0.000821242	0.0332603	k__Bacteria	p__Firmicutes	c__Clostridia	o__Clostridiales	f__Ruminococcaceae	g__Oscillospira	s__
43544	16	10	1228	263	0.543797	0.00925412	7.91773	1	1	0.983909	-1.56828	4.62319	4.92745e-05	0.00460527	k__Bacteria	p__Bacteroidetes	c__Bacteroidia	o__Bacteroidales	f__Prevotellaceae	g__Prevotella	s__
300235	6	7	13	157	0.276768	0.0410004	1.59306	0.13222	1	1.27199	1.52439	-0.276398	0.00113227	0.0404621	k__Bacteria	p__Firmicutes	c__Clostridia	o__Clostridiales	f__Lachnospiraceae	g__Roseburia	s__
309285	14	10	78	165	0.290573	0.00539593	3.21648	0.371706	1	-0.710785	1.46062	2.94954	0.000218649	0.0140123	k__Bacteria	p__Firmicutes	c__Clostridia	o__Clostridiales	f__	g__	s__
New.ReferenceOTU515	10	9	996	1232	0.258416	0.0216054	1.7635	0.139511	1	16.8955	1.45643	-13.1434	0.000591021	0.0276189	k__Bacteria	p__Firmicutes	c__Clostridia	o__Clostridiales	f__Lachnospiraceae	g__	s__
644244	19	11	5579	5943	0	0	Inf	1	1	8.47284	1.34158	-1.03651	0.000227399	0.0140123	k__Bacteria	p__Firmicutes	c__Clostridia	o__Clostridiales	f__Christensenellaceae	g__	s__
233549	19	11	4369	4389	0	0	Inf	1	1	14.1204	1.24378	-8.15028	0.000631319	0.0284093	k__Bacteria	p__Bacteroidetes	c__Bacteroidia	o__Bacteroidales	f__Bacteroidaceae	g__Bacteroides	s__
804526	18	11	171	487	0	0	67.2939	1	1	6.37433	1.20335	-3.57072	0.00102371	0.0388691	k__Bacteria	p__Firmicutes	c__Clostridia	o__Clostridiales	f__Lachnospiraceae	g__Coprococcus	s__
