# Supplementary figures and images for: Transport to the Slaughterhouse Affects the Salmonella Shedding and Modifies the Fecal Microbiota of Finishing Pigs
Source: MDPI journal article supplement (doi:10.3390/ani10040676), 2020-04-13

**Alpha diversity**

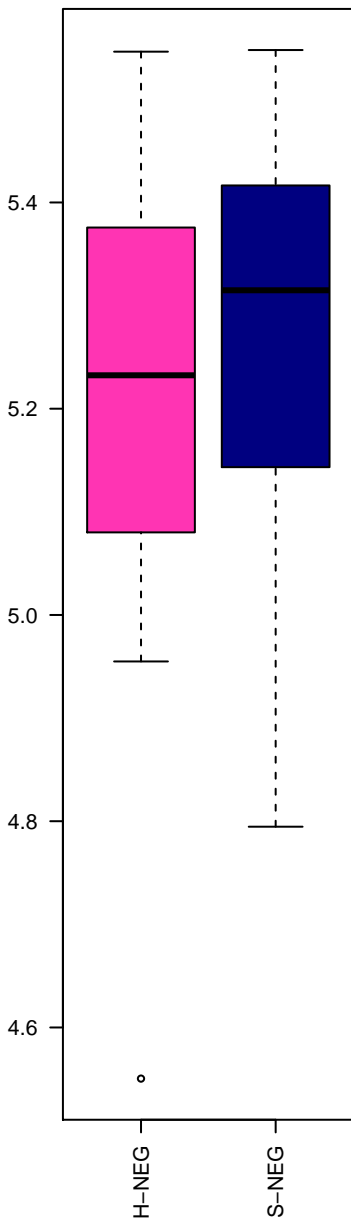

**Beta diversity**

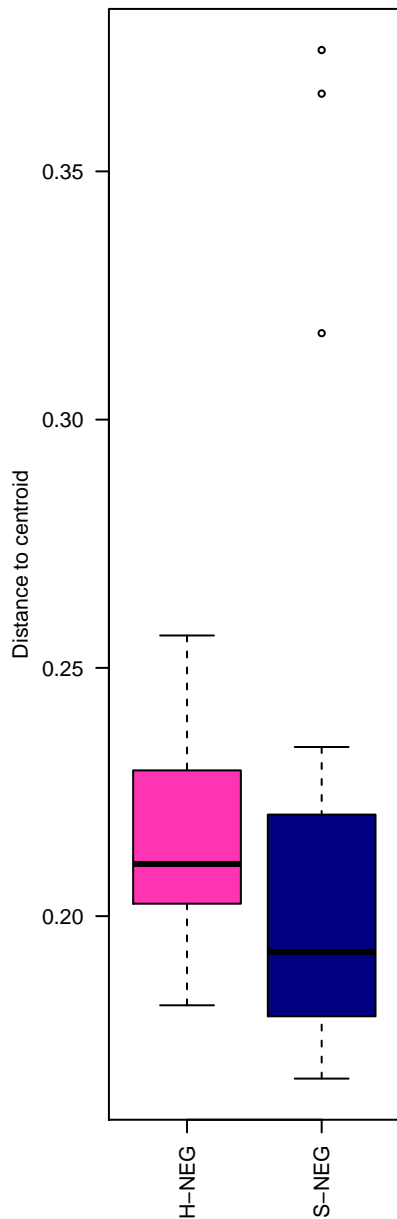

**Richness**

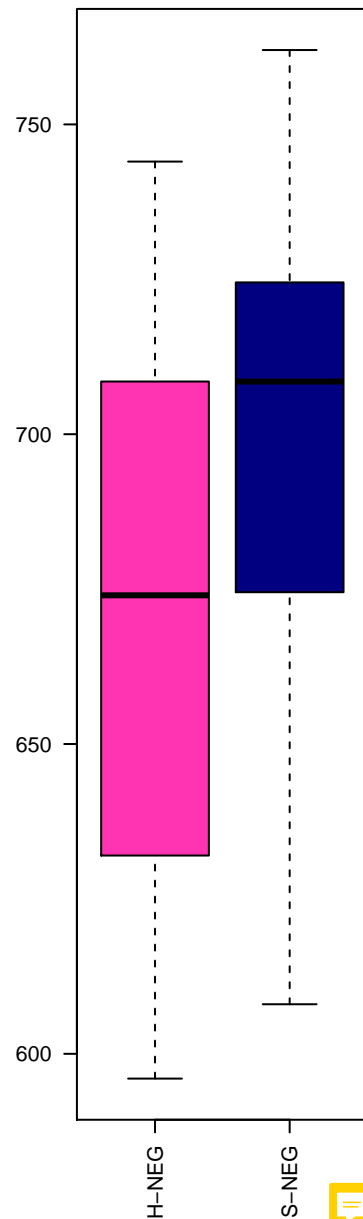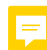

Supplement: s1 [file s1]
